# Supplementary material
Source: PubMed Central journal article supplement (PMC10807647)
Supplement: NIHMS1937077-supplement-322652_Data_Supplement.pdf [file NIHMS1937077-supplement-322652_Data_Supplement.pdf]

1 **SUPPLEMENTARY MATERIAL ONLINE**

2  
3 **Role of cAMP in Cardiomyocyte Viability: Beneficial or Detrimental?**

4  
5 Yishuai Zhang<sup>1</sup>, Si Chen<sup>1</sup>, Lingfeng Luo<sup>2,1,#</sup>, Sarah Greenly<sup>1</sup>, Hangchuan Shi<sup>3,4</sup>, Jasmine Jiayuan  
6 Xu<sup>1</sup> and Chen Yan<sup>1, \*</sup>

7  
8 <sup>1</sup>Aab Cardiovascular Research Institute, Department of Medicine

9 <sup>2</sup>Department of Biochemistry and Biophysics

10 <sup>3</sup>Department of Clinical and Translational Research

11 <sup>4</sup>Department of Public Health Sciences; University of Rochester School of Medicine and Dentistry,  
12 Rochester, NY 14642.

13  
14 # Current address is Department of Surgery, Stanford University, Stanford, CA 94305

15  
16 \*Correspondence to: Chen Yan, Ph.D., Aab Cardiovascular Research Institute, University of  
17 Rochester School of Medicine and Dentistry, Rochester, NY 14642. Phone: 585-276-7704.

18 Email: Chen\_Yan@urmc.rochester.edu

19  
20 Short title: Role of cAMP in Cardiomyocyte Viability

## Supplementary Materials and Methods

### Animal studies

All experimental C57BL/6J mice were purchased from Jackson Laboratories and housed in an air-conditioned room with a 12 h light–dark cycle and fed a standard chow diet with free access to tap water. All animal experiment procedures were performed according to the guidelines of the University of Rochester Committee on Animal Resources and the NIH Guide for the Care and Use of Laboratory Animals. All mice in animal experiments were randomized using simple randomization with a specific ID number before the procedure. Experimental mice were randomly assigned to different groups and treated as indicated. The sample sizes of animal studies were estimated by G\*power analysis (<https://www.psychologie.hhu.de/arbeitsgruppen/allgemeine-psychologie-und-arbeitspsychologie/gpower>) based on the primary parameters such as mean values and standard deviations taken from preliminary data at power 80% with an  $\alpha$  of 0.05. For the acute cardiac injury mouse model induced by ISO, a power calculation indicated that at least 7 animals in the ISO treatment groups would be required to provide >80% power ( $\alpha=0.05$ ) to detect a 60%-70% change in IgG-positive myocardium portion with a standard deviation of  $\approx 40\%$  based on our pilot experiments. Because these values for the sham groups are extremely low, 3 animals would be enough. Considering the variations of PANX1(WT) or PANX1(S206A) expression levels in individual mice that affect the outcomes, the mouse numbers were almost doubled in these groups. For the acute ischemia-reperfusion (IR) mouse model, considering the possible animal mortality in experiments, a power calculation indicated that at least 8-10 animals (10 for male mice, 8 for female mice, because the possible mortality of female mice in experiments is less than that of male mice) in the IR groups would provide >80% power ( $\alpha=0.05$ ) to detect a 40%-50% change in myocardial infarction area and cardiac function with a standard deviation of  $\approx 30\%$  based on our pilot experiments. The variations for the sham groups are much smaller, thus at least 6 animals would be enough.

### ISO-induced acute cardiac injury in mice

C57BL/6J mice aged 16-18 weeks were randomly chosen and subjected to subcutaneous injection with vehicle saline or isoproterenol (ISO, 100 mg/kg per 8 hours twice in 24 hours) as described previously with modifications<sup>30,31</sup>. 24 hours (h) later, mice were anesthetized via intraperitoneal injection of ketamine (80 mg/kg)/midazolam (0.6 mg/kg), and finally euthanized by cervical dislocation. Heart tissue and blood samples were collected for further analysis. The heart was stopped by injection of 10% potassium chloride (KCl) and excised. A part of heart ventricular tissue was snap-frozen in OCT for cryosectioning (5  $\mu$ m), and another part was snap-frozen in liquid nitrogen and stored at  $-80^{\circ}\text{C}$  for further experiments. Plasma was collected by centrifuging blood at 3500 g for 20 minutes (min) at  $4^{\circ}\text{C}$  and stored at  $-80^{\circ}\text{C}$  for further experiments. We only used male mice because our pilot study showed that female mice were resistant to acute ISO-induced cardiac injury in this model (Figure S12F and S12G). There was no animal excluded from the analysis in experiments.

To determine the role of pannexin-1 (PANX1) phosphorylation at S206 in ISO-induced acute cardiac injury, we created adeno-associated virus 9 (AAV9) expression vectors expressing GFP, human wild type PANX1 (PANX1(WT)), or PANX1 mutant with Serine 206 mutated to Alanine (PANX1(S206A) under the control of a cardiac-specific cTNT promoter. AAV9-cTNT-PANX1(WT), AAV9-cTNT-PANX1(S206A), or AAV9-cTNT-GFP virus was produced by Gene Therapy Center Vector Core of the University of North Carolina. AAV9 ( $2.2 \times 10^{11}$  vg/mouse) was intraperitoneally injected into postnatal male mice at 6-7 days as described<sup>32,33</sup>, and mice were then kept for further studies. Mice at 16 weeks old were subjected to acute ISO treatment as

99 described above. There were 6 groups of mice, including Saline/GFP (n=3), ISO/GFP (n=7),  
100 Saline/PANX1(WT) (n=6), ISO/PANX1(WT) (n=14), Saline/PANX1(S206A) (n=6) and  
101 ISO/PANX1(S206A) (n=14).  
102

### 103 **Ex vivo ischemia-reperfusion (IR) in isolated mouse hearts**

104 To evaluate the effect of e[cAMP] on IR-induced cardiac injury and the underlying  
105 mechanism, excluding the impact of other tissues or organs, we used isolated mouse hearts  
106 subjected to global ischemia and reperfusion with a Langendorff system *ex vivo*<sup>48</sup>. The sample  
107 sizes were determined according to our previous study<sup>48</sup>. There were two experiments. For  
108 experiment #1, there were two groups of mice, including IR without cAMP (n=6) and IR with cAMP  
109 (n=6). C57BL/6J male mouse at the age of 12-14 weeks was anesthetized via intraperitoneal  
110 injection of heparin and ketamine/midazolam, and the heart was isolated in a cold K-H buffer and  
111 quickly connected to Langendorff perfusion system. Under a constant perfusion pressure (80  
112 mmHg), the heart was equilibrated with K-H buffer (95% oxygen, 5% carbon dioxide, 37°C) and  
113 then perfused with K-H buffer containing with or without cAMP (20 μM) for 30 min and through  
114 the entire reperfusion period. Then, the heart was subjected to 40 min no-flow global ischemia  
115 followed by 50 min reperfusion. At the end of reperfusion, the coronary outflow was collected for  
116 CK activity measurement. For experiment #2, there were two groups of mice, including IR with  
117 PSB36 (A1R antagonist) (n=7) and IR with PSB36 plus cAMP (n=7). C57BL/6J male mouse at  
118 the age of 12-14 weeks was anesthetized via intraperitoneal injection of heparin and  
119 ketamine/midazolam, and the heart was isolated in a cold K-H buffer and quickly connected to  
120 Langendorff perfusion system. Under a constant perfusion pressure (80 mmHg), the heart was  
121 equilibrated with K-H buffer (95% oxygen, 5% carbon dioxide, 37°C) and then perfused with K-H  
122 buffer containing PSB36 (20 nM) with or without cAMP (20 μM) for 30 min and through the entire  
123 reperfusion period. Then, the heart was subjected to 40 min no-flow global ischemia followed by  
124 50 min reperfusion. At the end of reperfusion, the coronary outflow was collected for CK activity  
125 measurement. The heart was subjected to recycling perfusion with 2 mg/mL FITC-Dextran (40  
126 kDa) in K-H buffer for 20 min. After Dextran perfusion, the mouse heart was stopped by 10% KCl,  
127 fixed by 4% (wt/vol) paraformaldehyde (PFA), dehydrated by 30% sucrose in PBS, freezing  
128 embedded in OCT, and cryosectioned (5 μm). The Dextran-positive myocardium area was  
129 quantified as described above. The representative images were chosen based on their quality  
130 and to most accurately reflect the group average across all the available data.  
131

### 132 **In vivo mouse cardiac ischemia-reperfusion (IR) injury**

133 To evaluate the effect of extracellular cAMP (e[cAMP]) on IR-induced cardiac injury in mice,  
134 we used *in vivo* mouse cardiac IR model. C57BL/6J male or female mice aged 10-12 weeks were  
135 randomly chosen for cardiac IR injury or sham operation as described<sup>48</sup>. There were 4 groups,  
136 including sham/saline (n=6 for male or female mice), IR/saline (n=10 for male mice or n=8 for  
137 female mice), sham/cAMP (n=6 for male or female mice), and IR/cAMP (n=10 for male mice or  
138 n=9 for female mice). Briefly, mice were anesthetized with 2.0% isoflurane by endotracheal  
139 intubation performed with a 20-gauge intravenous catheter. Ischemia was performed by ligating  
140 the left anterior descending artery (LAD) at 1.5 to 2.0 mm below the left auricle. Occlusion of LAD  
141 was confirmed by the change of color and the elevation of the ST segment on the  
142 electrocardiogram. After 45 minutes (min) of occlusion, the suture was untied for reperfusion, and  
143 the chest cavity and skin incision were closed. Sham operation was performed via an identical  
144 procedure, except that the suture was just passed underneath LAD without occlusion. At the  
145 beginning of reperfusion, mice were subjected to subcutaneous injection with cAMP (10 mg/kg)  
146 or vehicle (saline). After 24 hours (h) of reperfusion, mouse cardiac function was detected by  
147 echocardiogram, and then mice were anesthetized via intraperitoneal injection of ketamine (80  
148 mg/kg)/midazolam (0.6 mg/kg). The blood samples were collected for further experiments. LAD  
149 was re-occluded at the same position for IR surgery. The heart was perfused with 2% Evans Blue

150 to delineate the risk area, stopped by injection 10% KCl and sliced into 4-5 slices (1 mm), and  
151 heart tissue slices were stained with 1% 2, 3, 5-Triphenyltetrazolium chloride (TTC) for the infarct  
152 areas. The area at risk (unstained by Evans blue dye) and the myocardial infarct area (unstained  
153 by TTC) were measured using ImageJ. The infarct area/risk area ratio was used to evaluate  
154 myocardial infarction, and the risk area/total area ratio was used to evaluate the repeatability and  
155 stability of surgery. The representative images were chosen based on their quality and to most  
156 accurately reflect the group average across all the available data. The heart tissues from another  
157 pack of mice were stopped by injection of 10% KCl and snap frozen in OCT for cryosectioning (5  
158  $\mu\text{m}$ ) for further experiments, including histological immunostaining and TUNEL staining. The mice  
159 were finally euthanized by cervical dislocation. The surgeries and echo assessments were  
160 processed by a surgery core technician who is blind from the grouping information and data  
161 collection. Analyses were carried out by another person. We excluded the mice that died during  
162 the ischemia surgery due to the surgery's failure.

163

### 164 **Echocardiography**

165 Cardiac function was evaluated via echocardiography. Mice were anesthetized via  
166 continuous inhaling isoflurane (2%) mixed with oxygen. Echocardiography was monitored in  
167 anesthetized mice using a Vevo3100 echocardiography machine equipped with an MS-550D 40-  
168 MHz frequency probe (VisualSonics). B-mode echocardiography on the long axis was used to  
169 assess ventricular function. The ejection fraction was calculated by the following formula: %EF=  
170  $(\text{LV end-diastolic volume} - \text{LV end-systolic volume}) / (\text{LV end-diastolic volume}) \times 100\%$ . The  
171 echocardiography data were collected blindly.

172

### 173 **Plasma cardiac troponin I measurement**

174 Plasma cardiac troponin-I (cTnI) was detected using the mouse cardiac troponin-I Elisa  
175 kit (Life Diagnostics inc, CTNI1HSP) to evaluate cardiac injury. The plasma samples were diluted  
176 by 4 folds, and the measurement was carried out as described<sup>9</sup>. The absorbance at 450 nm was  
177 measured in a plate reader (BMG LABTECH Inc, NC, USA). The results were calculated from the  
178 standard curve.

179

### 180 **Creatine kinase activity measurement**

181 Creatine kinase (CK) activity in collected coronary outflow was measured using the  
182 Creatine Kinase Activity Colorimetric Assay Kit (BioVision, K777-100) to evaluate cardiac injury  
183 in ex vivo studies<sup>49</sup>. At the end of heart perfusion, coronary outflow solution was collected for  
184 creatine kinase activity assay. The measurement was performed according to the manufacturer's  
185 instructions. 50  $\mu\text{L}$  samples were mixed with 50  $\mu\text{L}$  reaction mixture and incubated at 37°C for 40  
186 min. OD450nm values at 10 min and 40 min were recorded by a multi-plate reader. OD450nm  
187 value at the endpoint of the standard was recorded for standard curve preparation. The results  
188 were calculated from the standard curve, reaction time, and sample volume (CK activity = NADH  
189 amount/reaction time/sample volume).

190

### 191 **Myocardial IgG accumulation and quantification in the heart**

192 We measured myocardial accumulation of IgG by immunostaining to evaluate myocardial  
193 cell membrane integrity associated with cardiac injury<sup>34</sup>. After animal sacrifice, the excised heart  
194 was frozen, embedded in OCT, and cryosectioned into 5  $\mu\text{m}$  sections kept at -80°C for future  
195 experiments. Heart sections (without fixation) were dried at RT for 20 min, washed with PBS once  
196 for 2 min, and incubated with Dylight 594 conjugated goat anti-mouse IgG secondary antibody  
197 and Alexa Fluor™ 488 conjugated Wheat Germ Agglutinin (WGA) (20  $\mu\text{g}/\text{mL}$ ) at 4°C overnight.  
198 The sections were washed with PSB thrice for 5 min each and mounted with a gold anti-fade  
199 mounting solution. The whole heart cross-section was scanned by EVOS FL auto image system,  
200 or multiple images were taken with Olympus upright Epi-Fluorescence Microscope BX51 and

201 composited together. One heart section from each mouse was used. IgG-positive myocardium  
202 area with red fluorescence was analyzed by ImageJ. The result was presented as the percentage  
203 of IgG-positive myocardium versus whole heart cross-section area. The representative images  
204 were chosen based on their quality and to most accurately reflect the group average across all  
205 the available data.

206

### 207 **TUNEL staining and quantification in the heart**

208 Myocardial apoptosis in the heart was measured using Terminal deoxynucleotidyl  
209 transferase dUTP nick end labeling (TUNEL) staining. The frozen heart sections were dried and  
210 fixed in 4% PFA at RT for 1 h. After being washed with PBS, heart sections were permeabilized  
211 with 1% triton x-100 at RT for 1 h. The heart sections were washed with PBS and incubated with  
212 TUNEL staining buffer at 37°C for 1 h, according to the commercial kit manual (Sigma-Aldrich,  
213 12156792910). Myocytes and nuclei were visualized respectively using a membrane staining  
214 Alexa Fluor™ 488 conjugated WGA at 20 µg/ml RT for 1 h and 4',6-diamidino-2-phenylindole  
215 (DAPI) at 1µg/mL RT for 5 min. Heart sections were mounted with a gold anti-fade mounting  
216 solution. TUNEL-positive nuclei with red fluorescence indicated apoptotic CMs. One heart section  
217 from each mouse was used. 10 fields from each heart section were randomly imaged by Olympus  
218 upright Epi-Fluorescence Microscope BX51. Approximately  $1 \times 10^4$  cells from each heart section  
219 were counted using ImageJ. The result was presented as the percentage of TUNEL staining  
220 positive myocardial cells versus total myocardial cells in each heart section. The representative  
221 images were chosen based on their quality and to most accurately reflect the group average  
222 across all the available data.

223

### 224 **Proximity ligation assay and quantification in the heart and CMs**

225 We used proximity ligation assay (PLA) to detect PKA-mediated PANX1 phosphorylation  
226 (p-PANX1) in the heart. Mice were subjected to acute ISO treatment or cardiac IR, as indicated  
227 in the text. PLA was performed according to the commercial kit (Sigma-Aldrich, DUO92008-  
228 100RXN) protocol with some modifications. Frozen heart sections were fixed in precooled  
229 acetone at -20°C for 10 min, dried at RT for 20 min, washed with PBS 2 times for 5 min each, and  
230 permeabilized with 1% triton x-100 at RT for 1 h. Heart sections were washed with PBS 3 times  
231 for 5 min each time, blocked in Duolink blocking solution at RT for 1 h, and incubated in two  
232 primary antibodies together, e.g., mouse anti-pannexin1 antibody plus rabbit anti-Phospho-PKA  
233 Substrate (RRXS\*/T\*) antibody, rabbit anti-β-1AR antibody, rabbit anti-H2R antibody or rabbit  
234 anti-P2X7R antibody at 4°C overnight. Heart sections incubated with individual primary antibodies  
235 alone were used as negative controls. After washing away primary antibodies, heart sections  
236 were sequentially incubated in Duolink probe anti-rabbit plus (Sigma-Aldrich, DUO92004-  
237 100RXN) and anti-mouse minus mixture (Sigma-Aldrich, DUO92004-100RXN) at 37°C for 1 h, in  
238 ligation reaction mixture at 37°C for 30 min, and in amplification reaction mixture at 37°C for 100  
239 min. Myocardial cells were visualized using WGA staining as described above, and then heart  
240 sections were mounted with Duolink® In Situ Mounting Medium with DAPI (Sigma-Aldrich,  
241 DUO92004-100RXN). One section from each mouse was used. 7-10 fields from each section  
242 were randomly recorded by Olympus upright Epi-Fluorescence Microscope BX51. The red  
243 fluorescence intensity of the PLA positive signal and myocardium area were analyzed by ImageJ.  
244 The result was presented as the fluorescence intensity of PLA normalized by the myocardium  
245 area. The representative images for PLA quantification experiments were chosen based on their  
246 quality and to most accurately reflect the group average across all the available data.

247

248 We also used PLA to detect PKA-mediated p-PANX1 and protein-protein interaction in  
249 isolated CMs. PLA was carried out following commercial kit instructions with some minor  
250 modifications. Isolated CMs were seeded in Laminin-coated 35-mm glass bottom dishes. For  
251 detecting PKA-mediated p-PANX1, CMs were pretreated with PKA inhibitor followed by βAR or

252 H2R agonist stimulation as indicated in the text. For detecting CAMKII $\delta$  binding with calmodulin  
253 to reflect CAMKII activation <sup>71</sup>, CMs were pretreated with PANX1 inhibitor or P2X7R antagonist  
254 followed by  $\beta$ AR or H2R agonist stimulation as indicated in the text. For detecting protein-protein  
255 interaction, CMs at the basal condition were used. CMs were fixed in 4% PFA at RT for 1 h,  
256 washed with PBS 3 times for 5 min each, and permeabilized with 1% triton x-100 at RT for 1 h.  
257 CMs were sequentially washed with PBS 3 times for 5 min each, blocked in Duolink blocking  
258 buffer at RT for 1 h, and incubated with two primary antibodies together as indicated in the results,  
259 including mouse anti-PANX1 antibody, rabbit anti-Phospho-PKA Substrate (RRXS\*/T\*) antibody,  
260 rabbit anti-CAMKII $\delta$  antibody, mouse anti-calmodulin antibody, rabbit anti- $\beta$ -1AR antibody, rabbit  
261 anti-H2R receptor antibody, rabbit anti-P2X7R antibody, rabbit anti-A2A receptor antibody, mouse  
262 anti-MRP4 antibody, rabbit anti-CGRPR antibody and rabbit anti-RXFP1 antibody at 4°C  
263 overnight. Meanwhile, CMs were incubated with each corresponding primary antibody alone as  
264 negative controls. After washing away primary antibodies, myocytes were then sequentially  
265 incubated in Duolink probe anti-rabbit plus and anti-mouse minus mixture at 37°C for 1 h, in  
266 ligation reaction mixture at 37°C for 30 min, and in amplification reaction mixture at 37°C for 100  
267 min. Myocytes were visualized using WGA (20  $\mu$ g/ml at RT for 1 h) staining and then mounted  
268 with Duolink® In Situ Mounting Medium with DAPI. For quantification, 10 fields from each dish  
269 were randomly recorded by confocal microscope in a z-stack model. The red dot indicated a PLA  
270 positive signal. Approximately 40-50 CMs per dish were counted by ImageJ. The result was  
271 presented as an average dot number per CM. The representative images for PLA quantification  
272 experiments were chosen based on their quality and to most accurately reflect the group average  
273 across all the available data.

274

#### 275 **Adult mouse CM isolation and culture**

276 Adult mouse CM isolation and culture were performed according to our previous protocol  
277 with some modifications <sup>9,10</sup>. The sample sizes for *in vitro* studies were determined according to  
278 our previous experiences <sup>9,10</sup>. Briefly, C57BL/6J mice at 14-17 weeks were randomly chosen and  
279 anesthetized by intraperitoneal injection of heparin and ketamine (80 mg/kg)/midazolam (0.6  
280 mg/kg). The heart was rapidly harvested and placed in precooled isolation buffer (120 mM NaCl,  
281 15 mM KCl, 0.6 mM Na<sub>2</sub>HPO<sub>4</sub>, 0.6 mM KH<sub>2</sub>PO<sub>4</sub>, 1.2 mM MgSO<sub>4</sub>, 10 mM HEPES, 10 mM creatine  
282 monohydrate, 30 mM Taurine, 5.6 mM D-glucose, 4.6 mM NaHCO<sub>3</sub>, 10 mM BDM, filtered at 0.20  
283  $\mu$ m, pH 7.4) on ice to wash away blood and excess fat briefly. The heart was immediately  
284 cannulated using a blunted 20-gauge needle and connected to a Langendorff apparatus which  
285 used gravity to drive buffer heated to 37°C into the heart. The heart was initially perfused for 3  
286 min using isolation buffer, followed by calcium-free digestion buffer (isolation buffer with 1.3  
287 mg/mL collagenase II) for 3 min, then digestion buffer with 28 nM CaCl<sub>2</sub> for 6-10 min. Digestion  
288 was halted by removing the heart from the cannulating needle and placing it in 1 mL calcium-  
289 containing digestion buffer with 9 ml stopping buffer (isolation buffer with 10% FBS and 12.5 nM  
290 CaCl<sub>2</sub>). The atria were removed, and ventricles were dissociated using forceps in a petri dish. An  
291 additional 10 ml digestion buffer was then added to the dissociated heart and filtered through 200-  
292  $\mu$ m mesh into a 50 mL conical tube. The tube was then incubated for 5 min at 37°C followed by 5  
293 min at RT, allowing a pellet to form. In sterile conditions, the supernatant, primarily cardiac  
294 fibroblasts, was retained if desired or discarded. The pellet with CMs was then resuspended in a  
295 10 ml stopping buffer. Calcium concentration in this buffer was then gradually increased, with 2  
296 min between each step: first to 112.5 nM, then to 512.5 nM, and finally to 1.4  $\mu$ M. CMs were then  
297 visually inspected; more than 60% of myocytes retained rod-shaped morphology, then used for  
298 experiments. Myocytes were then kept at RT for 10 min to form a pellet and resuspended in CM  
299 culture medium (MEM with 0.02% BSA, 10 mM HEPES, 4 mM NaHCO<sub>3</sub>, 10 mM creatine, 0.5%  
300 insulin-selenium-transferrin, 2% penicillin/streptomycin (P/S), 10  $\mu$ M blebbistatin, pH 7.4). CMs  
301 were then plated on Laminin (10-20  $\mu$ g/mL) coated dishes, centrifuged at 500 g for 2 min, and  
302 incubated in a cell culture incubator for 2 h. CMs were washed twice with PBS to remove dead

303 cells and incubated in a fresh culture medium for 1 h before treatments. CMs were cultured in the  
304 presence of blebbistatin (a myosin II inhibitor) to block myocyte contraction and to extend their  
305 survival during the culture, as described previously<sup>9,10,62</sup>.

306

### 307 **Trypan blue viability assay and quantification**

308 To evaluate CM death, we performed trypan blue staining as described previously with  
309 some modifications<sup>9</sup>. Isolated CMs were seeded in Laminin coated 35-mm glass bottom dishes  
310 and then treated with different cell death stimuli (ISO, AMT, or H<sub>2</sub>O<sub>2</sub>) for 24 h with pretreatment  
311 of a vehicle or various reagents (inhibitors, antagonists, or calcium chelate) as indicated. After  
312 treatment, CMs were centrifuged at 500 g for 2 min and incubated with Trypan blue solution (final  
313 concentration of 0.2%) for 5 min. After removing the trypan blue solution, the whole glass bottom  
314 in the dish was automatically scanned with 20 fields and composited by the EVOS FL auto image  
315 system. The dead CM was stained blue. An average of 1 x 10<sup>3</sup> myocytes in each dish were  
316 counted using ImageJ. Some key experimental results were measured by two people, with one  
317 person counting blindly. The result was the percentage of trypan blue positive CMs versus total  
318 CMs. The representative images were chosen based on their quality and to most accurately  
319 reflect the group average across all the available data.

320

### 321 **LDH leakage measurement**

322 LDH leakage to the culture medium of damaged CMs was measured using the LDH  
323 Cytotoxicity Detection Kit (Takara Bio, MK401) as described<sup>10</sup>. After inducing CM death as  
324 indicated, the cell culture medium was centrifuged at 1 x 10<sup>3</sup> g for 5 min at 4°C to collect  
325 supernatant for LDH leakage measurement. Samples were incubated with a reaction mixture at  
326 RT for 30 min. OD490nm values were measured by a multi-plate reader. The results were  
327 calculated by comparing the sample OD490nm values to the control with a maximal OD490nm  
328 value derived from CMs treated with 1% Triton X-100 for 24 h to induce a maximal LDH leakage.  
329 The results were presented as the fold change of the control group.

330

### 331 **cAMP level measurement**

332 Intracellular or extracellular cAMP was measured using the cAMP Elisa kit (Cell Biolabs,  
333 STA-500). Each sample was collected from approximately 1.5-2 x 10<sup>5</sup> CMs cultured in 1 mL  
334 culture medium. CMs were pretreated with various inhibitors/antagonists followed by agonists of  
335 different GsPCRs as indicated. For intracellular cAMP measurement, CMs were lysed with lysis  
336 buffer after the treatment and centrifuged to collect the supernatant of cell lysis. To measure  
337 extracellular cAMP, the CM culture medium was collected by centrifugation and heated at 80°C  
338 for 5 min to inactivate enzymes involved in cAMP degradation. According to the cAMP assay Elisa  
339 kit manual, an acetylated sample or standard was incubated with an anti-cAMP antibody and HRP  
340 conjugated cAMP tracer at RT for 2 h in each well or the 96-well plate pre-coated with secondary  
341 antibody. Each well was washed 5 times and reacted with substrate solution at RT for 20 min.  
342 The reaction was stopped by the stopping solution. OD450nm value was recorded by a multi-  
343 plate reader. Results were calculated based on the standard curve and normalized to the protein  
344 concentration of the sample following the cAMP Elisa kit instruction using the nonacetylated  
345 protocol. For plasma cAMP measurement, each plasma sample was diluted for 2 folds by lysis  
346 buffer. Results were calculated based on the standard curve.

347

### 348 **Extracellular ATP measurement**

349 ATP was measured using the ATP determination kit (Thermo Fisher Scientific, A22066)  
350 based on the manual. Each sample is collected from approximately 1.5-2 x 10<sup>5</sup> CMs cultured in 1  
351 mL culture medium. Since ATP was known to be rapidly degraded by ATPases such as CD39 on  
352 the extracellular membrane surface, CMs were pretreated with a CD39 inhibitor, POM1 (20 μM).  
353 At the end of treatment, the CM culture medium was immediately collected by centrifugation and

354 heated at 80°C for 5 min to prevent ATP degradation. Standard or experimental samples were  
355 incubated with luciferase and its substrate D-Luciferin at 28°C for 15 min. The luminescence  
356 assay was carried out by a multi-plate reader. The results were calculated by standard curve and  
357 normalized by each sample protein concentration.

358

### 359 **Intracellular calcium measurement**

360 We used Fluo-4 to evaluate intracellular calcium changes in CMs as described with  
361 modifications<sup>72</sup>. Isolated CMs were seeded in Laminin-coated 35-mm glass bottom dishes. CMs  
362 were incubated with fresh CM culturing medium containing Fluo-4 AM (10 μM) and 0.2% Pluronic  
363 F127 for 30 min to allow Fluo-4 AM loading. Then the CM culturing medium was replaced by  
364 Tyrode buffer (140 mM NaCl, 5 mM KCl, 5 mM HEPES, 1 mM NaH<sub>2</sub>PO<sub>4</sub>, 1 mM MgCl<sub>2</sub>, 1.8 mM  
365 CaCl<sub>2</sub>, 10 mM glucose, and 10 μM blebbistatin, pH=7.4) and incubated in the dark for 20 min to  
366 allow for complete de-esterification of AM esters. CMs were kept at rest for 2 min and then  
367 subjected to treatment. The fluorescence signals of Fluo-4 in CMs were continuously recorded  
368 under the excitation and emission wavelength 488/515 nm every 1 min for 40 min by the time-  
369 lapse image system. 40 CMs on average from each dish were recorded. The fluorescence  
370 intensity of Fluo-4 was analyzed using SlideBook 6.0. The relative calcium change ( $\Delta F/F_0$ ) was  
371 calculated by the ratio of the maximal changes of Fluo-4 fluorescence intensity ( $\Delta F$ ) versus that  
372 at 0 min ( $F_0$ ).

373

### 374 **Pannexin-1 activity assay**

375 We evaluated PANX1 activity in CMs by measuring YO-PRO3 influx as described with  
376 modifications<sup>29</sup>. Isolated CMs were seeded in Laminin coated 35-mm glass bottom dishes and  
377 transfected with lentiviral PANX1(WT) or PANX1(S206A) for 48 hr. Then the CM culturing medium  
378 was replaced by assay buffer (144 mM NaCl, 5 mM KCl, 1 mM CaCl<sub>2</sub>, 1 mM MgCl<sub>2</sub>, 20 mM  
379 HEPES, 2mM L-D glucose, 10 μM blebbistatin, pH=7.4) and incubated with or without ISO (10  
380 μM) or AMT (10 μM) in the presence of YO-PRO3 (1 μM) for 20 min. The fluorescence images of  
381 YO-PRO3 in CMs were recorded under the excitation and emission wavelength 612/631 nm at 0  
382 min and 20 min. 10 random fields with 200 CMs on average from each dish were recorded by the  
383 EVOS FL auto image system. The fluorescence intensity of YO-PRO3 was analyzed using  
384 ImageJ. The relative change of YO-PRO3 ( $\Delta F/F_0$ ) was calculated by the ratio of maximal changes  
385 of the intensity ( $\Delta F$ ) versus that at 0 min ( $F_0$ ). The representative images were chosen based on  
386 their quality and to most accurately reflect the group average across all the available data.

387

### 388 **Immunoprecipitation**

389 After the treatment, the heart tissue or CM membrane protein was extracted according  
390 to the membrane protein extraction kit (Thermo Scientific, 89842). Protease inhibitor and  
391 phosphatase inhibitor cocktails were added to the extraction buffer. We immunoprecipitated  
392 PANX1 using PANX1 antibody and immunoblotting for phosphorylated PANX1 using phosphor-  
393 PKA Substrate (RRXS\*/T\*) antibody. 150 μg protein was mixed with 2 μg mouse-anti pannexin1  
394 primary antibody and 1 mg dynabeads protein G, and incubated with rotation at 4°C overnight.  
395 The beads were washed with membrane protein extraction lysis buffer 5 times and boiled with 1X  
396 loading buffer at 100°C for 7 min. The supernatant was subjected to Western blotting. The PKA  
397 phosphorylated PANX1 and total PANX1 were detected by immunoblotting with phosphor-PKA  
398 Substrate (RRXS\*/T\*) antibody and PANX1 antibody, respectively.

399

### 400 **Co-immunoprecipitation**

401 For identifying the complex of PANX1, β1AR, H2R, and P2X7R, we immunoprecipitated  
402 PANX1 from the membrane protein lysate of P2X7R overexpressed CMs using PANX1 antibody  
403 and immunoblotting PANX1, β1AR, H2R, and P2X7R using PANX1, β1AR, H2R, and P2X7R  
404 antibodies. 200 μg protein was pre-cleaned with 0.1 μg 0.5% BSA blocked TrueBlot® Anti-Rabbit



405 IgG Magnetic Beads for 1 hour at 4°C. Pre-cleaned protein was mixed with 4 µg rabbit anti-  
406 pannexin1 primary antibody or rabbit IgG and incubated with rotation at 4°C overnight. The protein  
407 mixture with PANX1 antibody or rabbit IgG was mixed with 0.2 µg BSA blocked TrueBlot® Anti-  
408 Rabbit IgG Magnetic Beads and incubated with rotation for 4 hours at 4°C. The beads were  
409 washed with membrane protein extraction lysis buffer 5 times and boiled with 1X loading buffer  
410 at 100°C for 7 min. The supernatant was subjected to Western blotting. The immunoblots of  
411 PANX1, β1AR, and H2R were performed using rabbit anti-PANX1 antibody, rabbit anti-β1AR  
412 antibody, rabbit anti-H2R, and Rabbit TrueBlot® Anti-Rabbit IgG HRP secondary antibody. The  
413 immunoblots of P2X7R were performed using goat anti-P2X7R antibody and Goat TrueBlot® Anti-  
414 Goat IgG HRP secondary antibody. The blot blocking and secondary antibody dilution (1:5000  
415 diluted in blocking buffer) were performed using blocking buffer containing 5% non-fat milk in  
416 PBST (Tween 20 diluted in PBS of 0.1%). The experiment was repeated 3 times.

417  
418 For identifying the complex of MRP4, A2AR, CGRP-R, and RXFP1, we  
419 immunoprecipitated MRP4 from CM membrane protein lysate using MRP4 antibody and  
420 immunoblotting MRP4, A2AR, CGRPR, and RXFP1 using MRP4, A2AR, CGRPR, and RXFP1  
421 antibodies. 200 µg protein was pre-cleaned with 0.1 µg 0.5% BSA blocked TrueBlot® Anti-Rabbit  
422 IgG Magnetic Beads for 1 hour at 4°C. Pre-cleaned protein was mixed with 4 µg rabbit anti-MRP4  
423 primary antibody or rabbit IgG and incubated with rotation at 4°C overnight. The protein mixture  
424 with PANX1 antibody or rabbit IgG was mixed with 0.2 µg BSA blocked TrueBlot® Anti-Rabbit IgG  
425 Magnetic Beads and incubated with rotation for 4 hours at 4°C. The beads were washed with  
426 membrane protein extraction lysis buffer 5 times and boiled with 1X loading buffer at 100°C for 7  
427 min. The supernatant was subjected to Western blotting. The immunoblots of MRP4 and A2AR  
428 were performed using rat anti-MRP4 antibody, goat anti-rat IgG HRP secondary antibody, mouse  
429 anti-A2AR antibody, and Mouse TrueBlot® ULTRA Anti-Mouse Ig HRP secondary antibody,  
430 respectively. The immunoblots of CGRPR and RXFP1 were performed using rabbit anti-CGRPR  
431 antibody, rabbit anti-RXFP1 antibody, and Rabbit TrueBlot® Anti-Rabbit IgG HRP secondary  
432 antibody. The blot blocking and secondary antibody dilution were performed using the blocking  
433 buffer as above. The experiment was repeated 3 times.

#### 434 435 **Western blot**

436 After the treatment, CMs were harvested and lysed in a buffer (RIPA buffer consisting of  
437 50 mM Tris-Cl, pH 7.4, 150 mM NaCl, 1% (v/v) NP-40, 0.1% (w/v) SDS, 1 mM EDTA, pH 8.0, or  
438 solubilization buffer from membrane protein extraction kit) with protease inhibitor cocktail (working  
439 concentration: 1.04 mM AEBSF, 0.8 µM Aprotinin, 40 µM Bestatin, 14 µM E-64, 20 µM Leupeptin  
440 and 15 µM Pepstatin A) and 100X phosphatase inhibitor cocktail (contents: sodium fluoride,  
441 sodium orthovanadate, sodium pyrophosphate and β-glycerophosphate, Thermofisher Scientific)  
442 on ice for 20 min. The cell lysate was centrifuged at 16000 × g 4°C for 15 min. The supernatant  
443 was collected, mixed with loading buffer, and heated at 100°C for 7 min. The sample was loaded  
444 in 10% SDS-PAGE gel and subjected to electrophoresis in a constant voltage (110 V) model for  
445 2 h. For detecting PANX1 protein levels in CMs overexpressing GFP, PANX1(WT),  
446 PANX1(S206A), or PANX1(S206D), or for detecting P2X7R protein levels in CMs overexpressing  
447 LacZ or hP2X7R, 15~20 µg protein per sample was loaded into the gel. After electrophoresis, the  
448 protein was transferred onto the PVDF membrane in a constant current (140 mA) model for 1 h.  
449 The blot was blocked by blocking buffer containing 5% bovine serum albumin in PBST for 1 h and  
450 incubated with the primary antibody, including rabbit anti-Phospho-PKA substrate, rabbit anti-  
451 PANX1, rabbit anti-P2X7R or mouse anti-GAPDH antibodies at 4°C overnight. The primary  
452 antibody was removed, and the blot was washed by PBST and incubated with HRP-conjugated  
453 secondary antibody (1:5000 diluted in blocking buffer) at RT for 1 h. The secondary antibody was  
454 washed away by PBST. The blot was exposed using ECL reagent (Immobilon Western  
455 Chemiluminescent HRP Substrate, Millipore, WBKLS0100) and imaged by Biorad gel dock. The

456 phosphorylated PANX1 level was normalized to the total PANX1, and the PANX1 or P2X7R level  
 457 was normalized to GAPDH. The representative images were chosen based on their quality and  
 458 to most accurately reflect the group average across all the available data.

459

460 **Lentivirus production and transduction**

461 The lentiviral expression vectors carrying human wild-type PANX1 (pLV[Exp]-Puro-  
 462 CMV>hPANX1(WT)), PANX1(S206A) with serine 206 (TCT) mutated to alanine (GCC)  
 463 (pLV[Exp]-Puro-CMV>hPANX1(S206A)) and PANX1(S206D) with serine 206 (TCT) mutated to  
 464 aspartic acid (GAC) (pLV[Exp]-Puro-CMV>hPANX1(S206D)) were generated by Vector-Builder,  
 465 and pLV[Exp]-Puro-CMV>GFP was used as negative control. The lentiviral expression vectors  
 466 for shRNAs were designed with the online software from Vector-Builder and produced by Vector-  
 467 Builder Inc. In lentivirus-mediated transduction, CMs were treated with lentivirus for 8 h, and the  
 468 virus was washed away by fresh medium. CMs were cultured for an additional 48 h and then  
 469 subjected to further treatment. The sequences of shRNA vectors are shown below.

470

|                                       |                        |
|---------------------------------------|------------------------|
| 471 pLV[shRNA]-EGFP-U6>mAdcy5         | AGAATCACTGTTTACGGATTA  |
| 472 pLV[shRNA]-EGFP-U6>mAdcy6         | CACCCTGATACTCGGGATTTA  |
| 473 pLV[shRNA]-EGFP-U6>mAbcc4 (MRP4)  | GGTATACTTCAGACGGAATTA  |
| 474 pLV[shRNA]-EGFP-U6>mAbcc5 (MRP5)  | GTGCATTC TCATCTCCAAATT |
| 475 pLV[shRNA]-EGFP-U6>mEnpp1         | CCAGAGACATACTATTCATTT  |
| 476 pLV[shRNA]-EGFP-U6>mEnpp2         | CGACCCAAGATTCCCAATAAT  |
| 477 pLV[shRNA]-EGFP-U6>mEnpp3         | CGGCAATGTATCAAGGTTTAA  |
| 478 pLV[shRNA]-EGFP-U6>mNt5e (CD73)   | GCACTGGGAAATCATGAATTT  |
| 479 pLV[shRNA]-EGFP-U6>mAdora1        | CATGGAGTACAT GGTCTACTT |
| 480 pLV[shRNA]-EGFP-U6>mEntpd1 (CD39) | CCAAGGACATTCAGGTTTCAA  |
| 481 pLV[shRNA]-EGFP-U6>mPANX1         | CCACCTTCGATGTTCTACATT  |
| 482 pLV[shRNA]-EGFP-U6>mP2RX7         | CCTGGACAATCTGAGGAAATT  |
| 483 pLV[shRNA]-EGFP-U6>Scramble       | CCTAAGGTTAAGTCGCCCTCG  |

484

485 **Adenovirus production and transduction**

486 Adenovirus expressing hP2X7R (Ad-P2X7R) was generated using the ViraPower  
 487 Adenovirus Expression System (Invitrogen) according to the manufacturer's protocol. Adenovirus  
 488 expressing LacZ (Ad-Laz) was used as a negative control. We performed Ad-P2X7R and Ad-  
 489 LacZ titration. WT adult mouse CMs were respectively transduced with Ad-P2X7R (50 MOI) or  
 490 Ad-Laz (50 MOI), and the virus was washed away 6 h later. CMs were further cultured for an  
 491 additional 48 h and then subjected to the indicated treatment. P2X7R expressions were detected  
 492 by western blot.

493

494 **Reverse transcription quantification PCR**

495 CM RNA was extracted by TRIZOL according to the manufactural protocol. 1 µg total  
 496 RNA was used as the template for reverse transcription into cDNA with iScript™ Reverse  
 497 Transcription Supermix (Bio-rad, 1708841). The gene expression was evaluated via real-time  
 498 PCR following the kit manual (Bio-rad, 1708882). The real-time PCR was performed through  
 499 Polymerase activation and DNA denaturation (95°C for 3 min), 40 times thermal cycles  
 500 (Denaturation at 95°C for 10 seconds, annealing and extension at 55°C for 30 seconds). Each  
 501 experiment was repeated 4 times. GAPDH was used as the housekeeping gene. Data were  
 502 normalized by GAPDH. The results were presented as the fold change of the control group  
 503 average. The information of PCR primes are shown below.

504

| 505 Gene name                   | Sequences            | Product length (bp) |
|---------------------------------|----------------------|---------------------|
| 506 Mouse Adcy5, forward 5'-3': | ACCGCCAATGCCATAGACTT | 125                 |

|     |                                     |                          |     |
|-----|-------------------------------------|--------------------------|-----|
| 507 | Mouse Adcy5, reverse 5'-3':         | TGCAGATACAGAGCCAGCAC     |     |
| 508 | Mouse Adcy6, forward 5'-3':         | CGGCTCATGGAGCAGATGAA     | 80  |
| 509 | Mouse Adcy6, reverse 5'-3':         | GGACCCATGTTCAACCCGAT     |     |
| 510 | Mouse mAbcc4 (MRP4), forward 5'-3': | GTCAGAGGCCATCGTCAGCA     | 136 |
| 511 | Mouse mAbcc4 (MRP4), reverse 5'-3': | CTTGTCCCAGAAAGCGGTGAAA   |     |
| 512 | Mouse mAbcc5 (MRP5), forward 5'-3': | CGAAGGGTTGTGTGGATCTTTTG  | 142 |
| 513 | Mouse mAbcc5 (MRP5), reverse 5'-3': | GGTTAGACTCTGTTGCCTGGGTG  |     |
| 514 | Mouse ENPP1, forward 5'-3':         | AGACGACTGCAAAACCCACA     | 128 |
| 515 | Mouse ENPP1, reverse 5'-3':         | GTGATTCAAACCTCTGCTGGACAC |     |
| 516 | Mouse ENPP2, forward 5'-3':         | TGATAAGGTAGAGCCAAAGAACA  | 99  |
| 517 | Mouse ENPP2, reverse 5'-3':         | GCAGGTCGTCCATACAGGAG     |     |
| 518 | Mouse ENPP3, forward 5'-3':         | GCACTACAGAATACGCCTGG     | 71  |
| 519 | Mouse ENPP3, reverse 5'-3':         | GCAACCTCGCCTTCGCTA       |     |
| 520 | Mouse Nt5e (CD73), forward 5'-3':   | TCCTGCAAGTGGGTGGAATC     | 105 |
| 521 | Mouse Nt5e (CD73), reverse 5'-3':   | AGATGGGCACTCGACACTTG     |     |
| 522 | Mouse Adora1, forward 5'-3':        | GTGATTTGGGCTGTGAAGGT     | 142 |
| 523 | Mouse Adora1, reverse 5'-3':        | AGTAGGTCTGTGGCCCAATG     |     |
| 524 | Mouse PANX1, forward 5'-3':         | ACTGTGGCTGCACAAGTTCT     | 85  |
| 525 | Mouse PANX1, reverse 5'-3':         | AGAGAAGCGCCAGAAGAGTG     |     |
| 526 | Mouse P2X7R, forward 5'-3':         | GGGGTGACGAAGTTAGGACA     | 110 |
| 527 | Mouse P2X7R, reverse 5'-3':         | ACTTGGCCTTCTGACTTGACA    |     |
| 528 | Mouse Entpd1 (CD39), forward 5'-3': | ATCACCTTCGTGCCCAAAA      | 169 |
| 529 | Mouse Entpd1 (CD39), reverse 5'-3': | CGCCACCACTTGAAACCTGA     |     |
| 530 | Mouse GAPDH, forward 5'-3':         | TCAAGAAGGTGGTGAAGCA      | 100 |
| 531 | Mouse GAPDH, reverse 5'-3':         | TGGGAGTTGCTGTTGAAGTC     |     |

532  
533 **Statistical analysis**

534 The specific sample size for each group is provided in the corresponding figure legends.  
535 Data are presented as mean  $\pm$  SEM. The normality assumptions were assessed in accordance  
536 with our prior similar studies<sup>73,74</sup>, initially tested using the Shapiro-Wilk test, and further validated  
537 through examination of residuals via q-q plots. **In cases where the sample size was insufficient to**  
538 **ascertain normality (e.g., group n < 6), a non-parametric test was employed.** To evaluate the  
539 equality of variances, the Brown-Forsythe test was applied. Consequently, the following statistical  
540 approaches were utilized: (1) Normally distributed data with equal variance were analyzed using  
541 the unpaired t-tests for two independent groups or the one-way/two-way ANOVA followed by post-  
542 hoc comparisons for three or more groups. (2) Normally distributed data rejecting equal variance  
543 were analyzed employing the Welch's t-test for two independent groups or the Welch ANOVA  
544 with Dunnett T3 post hoc tests for three or more groups. (3) Data with undetermined normal  
545 distribution underwent analysis using the Mann-Whitney test for two independent groups or the  
546 Kruskal-Wallis test with post-hoc Conover-Iman test for three or more groups. (4) When focusing  
547 on two conditions and normal data distribution remained undetermined, a two-way Aligned Ranks  
548 Transformation (ART) ANOVA was conducted. Bonferroni corrections were applied to control type  
549 I error inflation in multiple post-hoc comparisons, with corresponding adjusted P-values reported.  
550 All multiple comparisons were conducted within the same test; no experiment-wide multiple tests  
551 were applied in this study. Both parametric and non-parametric tests were two-sided, with a  
552 significance level set at 5%. The ART ANOVA models and Conover-Iman tests were executed  
553 using the ARTool and conover.test packages, respectively, in R 4.2.3 (<https://www.R-project.org/>).  
554 All other statistical analyses were performed using GraphPad Prism 9.0. Additional details  
555 regarding the statistical methods can be found in the figure legends.

556  
557

558 **Reagents and kits**  
 559 <sup>10</sup>PANX (ApexBio, A2700)  
 560 A804598 (Cayman Chemical Company, 20060)  
 561 Amthamine dihydrobromide (Tocris, 0668)  
 562 Apyrase (Sigma-Aldrich, A6535-200UN)  
 563 ATP Determination Kit (Thermo Fisher Scientific, A22066)  
 564 Autocamtide-2-related inhibitory peptide myristoylated (Tocris, 5959)  
 565 Blebbistatin (Cayman Chemical Company, 13013)  
 566 Bovine Serum Albumin (Sigma-Aldrich, A9647)  
 567 cAMP (Cayman Chemical Company, 18820)  
 568 cAMP Colorimetric ELISA Kit (Cell Biolabs, STA-500)  
 569 Ceefourin1 (Tocris, 5867)  
 570 CGP20712 (Tocris, 1024)  
 571 collagenase type II (Worthington Biochemical, LS004176)  
 572 Creatine Kinase (CK) Activity Colorimetric Assay Kit (BioVision, K777-100)  
 573 CV1808 (Tocris, 1710)  
 574 Deaminase (Sigma-Aldrich, 10102105001)  
 575 Dextran 40 (Sigma-Aldrich, FD40)  
 576 DMEM (Corning, 15017CV)  
 577 Duolink® In Situ Detection Reagents Red (Sigma-Aldrich, DUO92008-100RXN)  
 578 Duolink® In Situ Mounting Medium with DAPI (Sigma-Aldrich, DUO82040-5ML)  
 579 Duolink® In Situ PLA® Probe Anti-Mouse MINUS, Affinity purified Donkey anti-Mouse IgG  
 580 (Sigma-Aldrich, DUO92004-100RXN)  
 581 Duolink® In Situ PLA® Probe Anti-Rabbit PLUS, Affinity purified Donkey anti-Rabbit IgG (Sigma-  
 582 Aldrich, DUO92002-100RXN)  
 583 Duolink® In Situ Wash Buffers, Fluorescence (Sigma-Aldrich, DUO82049-4L)  
 584 ENPP1 inhibitor c (Cayman Chemical Company, 29809)  
 585 EGTA (Sigma-Aldrich, 324626-25GM)  
 586 Famotidine (Tocris, 7290)  
 587 Fetal Bovine Serum (Thermo Fisher Scientific, 10437028)  
 588 Fluo-4 AM (Ion Biosciences, 1041C)  
 589 Gap 26 (Cayman Chemical Company, 36625)  
 590 Halt™ Phosphatase Inhibitor Cocktail (100X)(Thermo Fisher Scientific, 78420)  
 591 Human CGRP8-37 (Tocris, 1181)  
 592 Human  $\alpha$ -CGRP (Tocris, 3012)  
 593 ICI118,551 (Tocris, 0821)  
 594 In Situ Cell Death Detection Kit, TMR red (Sigma-Aldrich, 12156792910)  
 595 Insulin-Transferrin-Selenium (ITS -G) (100X) (Thermo Fisher Scientific, 41400045)  
 596 Immobilon Western Chemiluminescent HRP Substrate (Millipore, WBKLS0100)  
 597 iQ™ SYBR® Green Supermix (Bio-rad, 1708882)  
 598 iScript™ Reverse Transcription Supermix (Bio-rad, 1708841)  
 599 Isoprenaline hydrochloride (Sigma-Aldrich, I5627)  
 600 KN 92 (Tocris, 4130)  
 601 KN 93 (Tocris, 1278)  
 602 Laminin (VWR, 47743-734)  
 603 LDH Cytotoxicity Detection Kit (Takara Bio, MK401)  
 604 LY294002 (Tocris, 1130)  
 605 MEM (Thermo Fisher Scientific, 11095080)  
 606 MK-571 (Tocris, 2338)  
 607 MOUSE CARDIAC TROPONIN-I ELISA (Life diagnostics inc, CTNI1HSP)  
 608 Novex DYNAL Dynabeads Protein (Thermo Fisher Scientific, G 10-003-D)

609 Penicillin-Streptomycin (10,000 U/mL) (Thermo Fisher Scientific, 15140122)  
610 Pierce™ Mem-PER™ Plus Membrane Protein Extraction Kit (Thermo Scientific, 89842)  
611 PKI 14-22 (Tocris, 2546)  
612 Pluronic F127 (Sigma-Aldrich, P2443)  
613 POM1 (Tocris, 2689)  
614 PolyJet In Vitro DNA Transfection Reagent (SignaGen Laboratories, SL100688)  
615 Protease Inhibitor Cocktail (Sigma-Aldrich, P8340)  
616 PSB12379 (Cayman Chemical Company, 28446)  
617 PSB36 (Tocris, 2019)  
618 Relaxin-2 (Sigma-Aldrich, SRP3147)  
619 RIPA buffer (VWR, N653)  
620 S32826 (Cayman Chemical Company, 13664)  
621 scrambled <sup>10</sup>PANX (ApexBio, A2701)  
622 TCS2510 (Tocris, 4069)  
623 TrueBlot® Anti-Rabbit IgG Magnetic Beads (Rockland, 00-1800-20)  
624 TRIZOL (Thermo Fisher Scientific, 15596026)  
625 Trypan blue (ICN Biomedicals Inc, 194600)  
626 Wheat Germ Agglutinin, Alexa Fluor™ 488 Conjugate (Thermo Fisher Scientific, W11261)  
627 YO3-PRO3 (Thermo Fisher Scientific, Y3607)  
628 Zinterol hydrochloride (Sigma-Aldrich, Z4402)  
629 ZM241385 (Tocris, 1036)

630

### 631 **Antibodies**

632 Rabbit anti-A2AR antibody (Alomone Labs, AAR-002) for PLA 1:100  
633 Mouse anti-A2AR antibody (Santa Cruz, sc-32261) for co-ip 1:200  
634 Rabbit anti-β1AR antibody (Alomone Labs, AAR-023) for PLA 1:100  
635 Rabbit anti-β1AR antibody (Proteintech, 28323-1-AP) for co-ip 1:1000  
636 Mouse anti-cAMP antibody (Novus Biologicals, MAB2146)  
637 Rabbit anti-CaMKIIδ antibody (ABclonal, A0656) for PLA 1:100  
638 Mouse anti-Calmodulin antibody (Thermo Fisher Scientific, MA3-917) for PLA 1:100  
639 Rabbit anti-CGRPR antibody (Novus Biologicals, NLS6731) for PLA 1:50  
640 Rabbit anti-CGRPR antibody (ABclonal, A11979) for co-ip 1:1000  
641 Mouse anti-GAPDH antibody (MilliporeSigma, MAB374) for Western blot 1:5000  
642 Rabbit anti-H2R antibody (ABclonal, A14170) for PLA 1:100, for co-ip 1:1000  
643 Rabbit anti-MRP4 antibody (AssayGenie, CAB2198)  
644 Rat anti-MRP4 antibody (Novus Biologicals, NBP1) for co-ip 1:1000  
645 Mouse anti-MRP4 antibody (Santa Cruz, sc-376262) for PLA 1:50  
646 Rabbit anti-P2X7R antibody (Alomone Labs, APR-008) for western blot 1:1000  
647 Goat anti-P2X7R antibody (Abcam, ab93354) for co-ip 1:1000  
648 Mouse anti-pannexin-1 antibody (Novus Biologicals, MAB7097) for PLA 1:100  
649 Rabbit anti-pannexin-1 antibody (Proteintech, 12595-1-AP) for western blot 1:1000  
650 Rabbit anti-Phospho-PKA substrate (RRXS\*/T\*) antibody (Cell Signaling, 96245) for PLA 1:100,  
651 for western blot 1:1000  
652 Rabbit anti-RXFP1 antibody (Proteintech, 18419-1-AP) for PLA 1:50  
653 Rabbit anti-RXFP1 antibody (ABclonal, A7127) for co-ip 1:1000  
654 Goat anti-Mouse IgG (H+L) cross-adsorbed secondary antibody, DyLight 594 conjugated  
655 (Thermo fisher Scientific, 35510) for immunostaining 1:100  
656 Goat TrueBlot®: Anti-Goat IgG HRP (Rockland, 18-8814-31) for co-ip 1:5000  
657 Mouse TrueBlot® ULTRA: Anti-Mouse Ig HRP (Rockland, 18-8817-30) for co-ip 1:5000  
658 Mouse IgG HRP Linked Whole Ab (Millipore Sigma, GENA931) for western blot 1:5000  
659 Rabbit TrueBlot®: Anti-Rabbit IgG HRP (Rockland, 18-8816-31) for co-ip 1:5000

660 Rabbit IgG HRP Linked Whole Ab (Millipore Sigma, GENA934) for western blot 1:5000  
661 Anti-rat IgG, HRP-linked Antibody (Cell Signaling, 7077s) for co-ip 1:5000

662  
663  
664  
665  
666  
667  
668  
669  
670  
671  
672  
673  
674  
675  
676  
677  
678  
679  
680  
681  
682  
683  
684  
685  
686  
687  
688  
689  
690  
691  
692  
693  
694  
695  
696  
697  
698  
699  
700  
701  
702  
703  
704  
705  
706  
707  
708  
709

710

## Figure S1

711

712

713

714

715

716

717

718

719

720

721

722

723

724

725

726

727

728

729

730

731

732

733

734

735

736

737

738

739

740

741

742

743

744

745

746

747

748

749

750

751

752

753

754

755

756

757

758

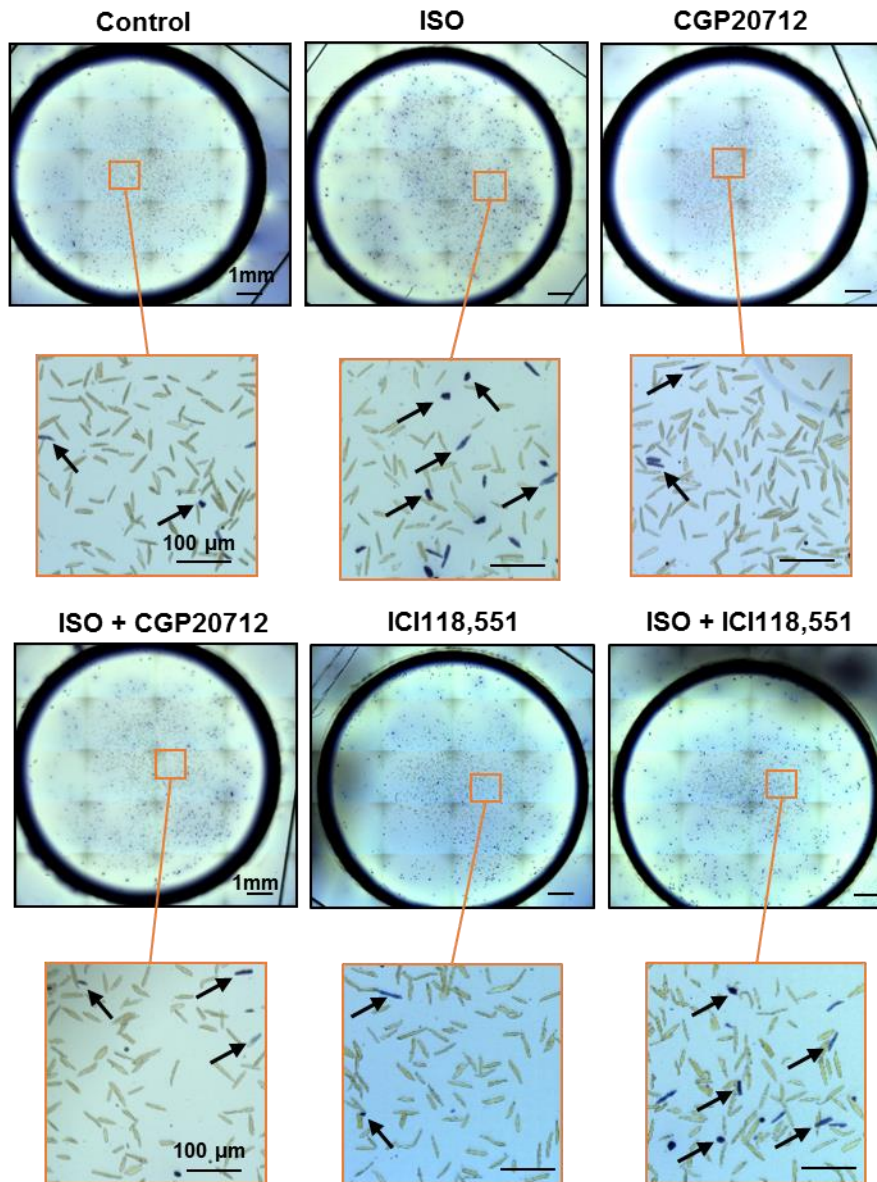

### Figure S1. Images of trypan blue exclusion assay.

Low magnification images showing adult mouse CMs with trypan blue exclusion assay on an entire field of the glass-bottom dish, which were composited together from 20 fields/each dish captured by EVOS FL auto image system. Approximately  $1 \times 10^3$  CMs were used in each dish to quantify CM death. The images with orange borders are the corresponding zoomed areas. Black arrows indicate the trypan blue stained CMs (dead CM). CMs were treated with 10  $\mu$ M ISO in the presence or absence of  $\beta$ 1AR antagonist CGP20712 (0.5  $\mu$ M),  $\beta$ 2AR antagonist ICI118,551 (0.5  $\mu$ M), or vehicle for 24 h.  $n$  = independent CM isolations from 4 mice. The representative images were chosen based on their quality and to most accurately reflect the group average across all the available data.

759  
760  
761  
762  
763  
764  
765  
766  
767  
768  
769  
770  
771  
772  
773  
774  
775  
776  
777  
778  
779  
780  
781  
782  
783  
784  
785  
786  
787  
788  
789  
790  
791  
792  
793  
794  
795  
796  
797  
798  
799  
800  
801  
802  
803  
804  
805  
806  
807  
808  
809

## Figure S2

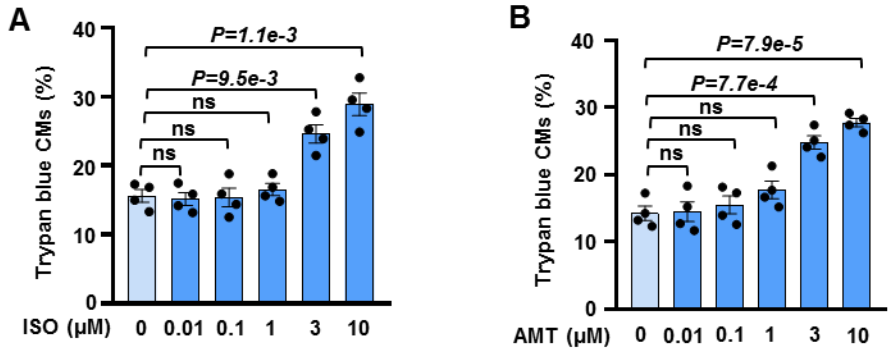

### Figure S2. The dose-response studies of $\beta$ AR and H2R agonists on CM death.

**A**, Quantitative result of trypan blue exclusion assay showing that  $\beta$ AR agonist ISO induced CM death in a dose-dependent manner,  $n=4$ . **B**, Quantitative result of trypan blue exclusion assay showing that H2R agonist AMT induced CM death in a dose-dependent manner,  $n=4$ . Data were presented as mean  $\pm$  SEM. Data in **Figures S2A** and **S2B** were analyzed by the Kruskal-Wallis test followed by Conover-Iman post-hoc test with Bonferroni corrections for 5 comparisons. All reported P-values have been adjusted for a predetermined number of multiple comparisons, as specified in the corresponding figures.  $P < 0.05$  was statistically significant. ns: no significant difference.



810  
811  
812  
813  
814  
815  
816  
817  
818  
819  
820  
821  
822  
823  
824  
825  
826  
827  
828  
829  
830  
831  
832  
833  
834  
835  
836  
837  
838  
839  
840  
841  
842  
843  
844  
845  
846  
847  
848  
849  
850  
851  
852  
853  
854  
855  
856  
857  
858  
859

**Figure S3**

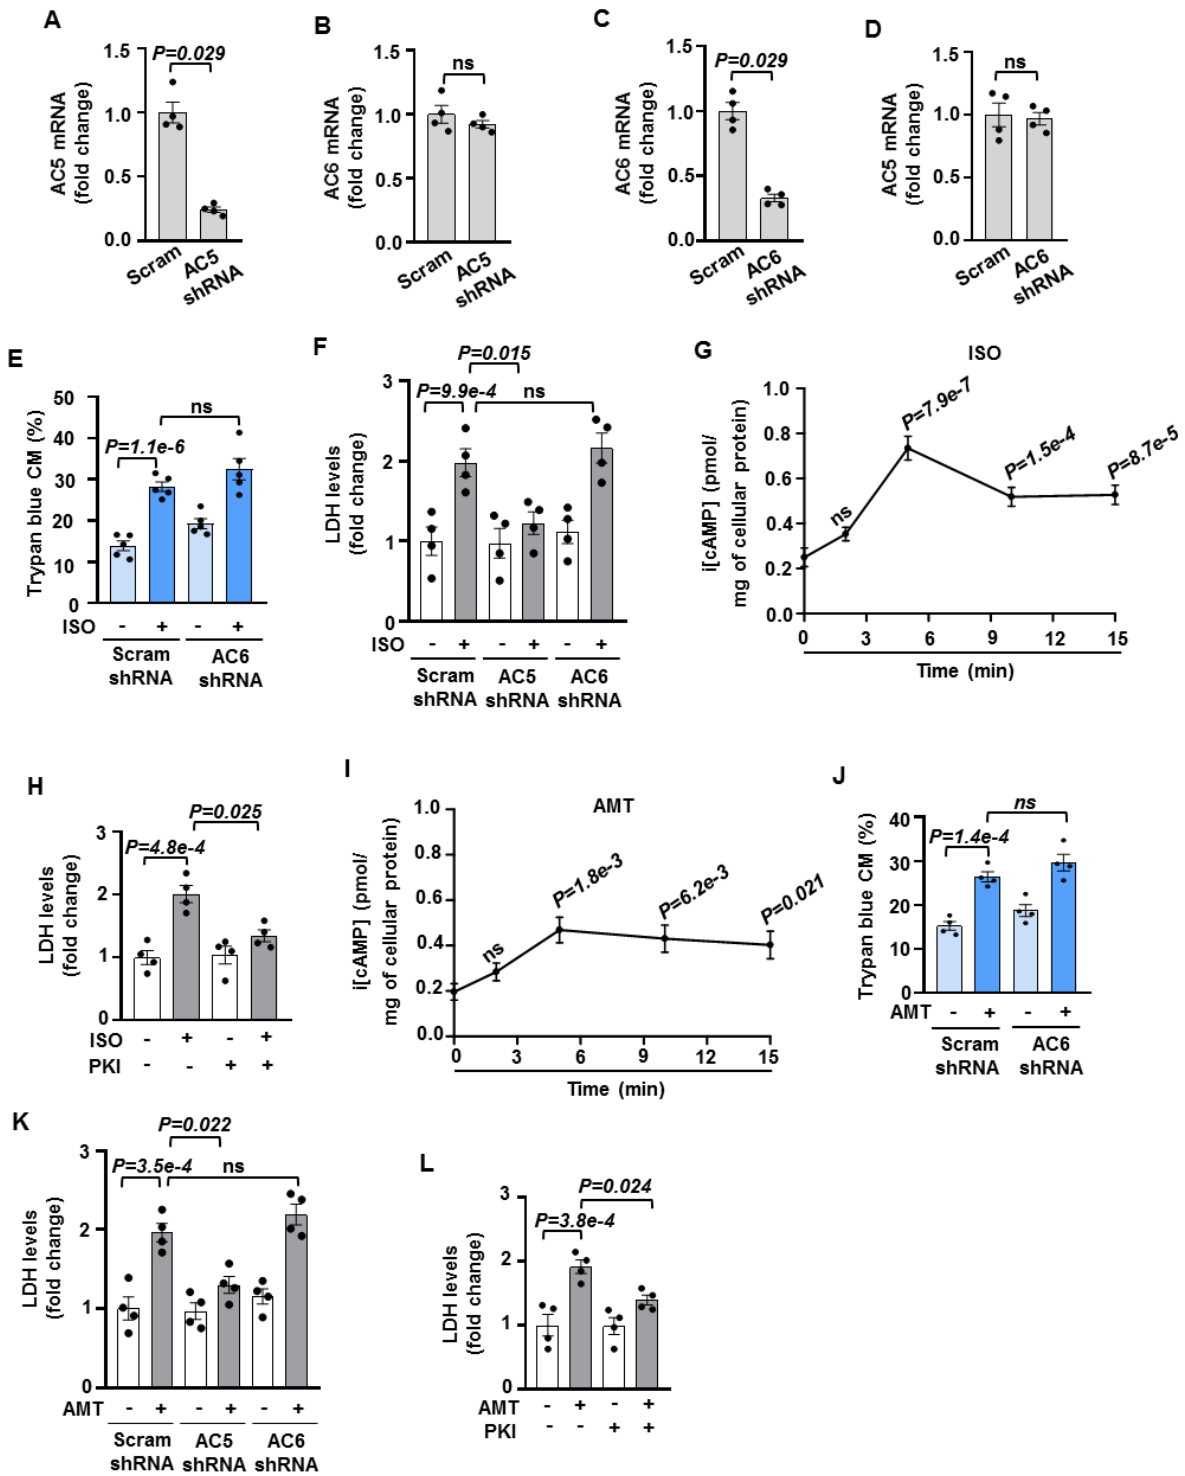

860 **Figure S3. The role of AC5 or AC6 in  $\beta$ 1AR- and H2R-induced CM death; the time course of**  
861  **$\beta$ 1AR- and H2R-induced i[cAMP] changes in CMs.**

862 **A-D**, Results of RT-qPCR showing mRNA levels of AC5 or AC6 in CMs treated with AC5 or AC6  
863 shRNA lentivirus. AC5 shRNA largely reduced AC5 expression but did not affect AC6 expression,  
864 and AC6 shRNA largely reduced AC6 expression but did not affect AC5 expression. These results  
865 demonstrated the efficiency and specificity of AC5 and AC6 expression knockdown, n=4. Data  
866 were normalized by the housekeeping gene GAPDH. The results were presented as the fold  
867 change of the control group average. **E** and **J**, Quantitative trypan blue exclusion assay results  
868 show that AC6 shRNA did not significantly affect CM death induced by ISO (10  $\mu$ M) or AMT (10  
869  $\mu$ M) for 24 h, n=5 for **E** and 4 for **J**. **F** and **K**, Results of LDH levels showing that AC5 shRNA, but  
870 not AC6 shRNA, attenuated ISO- or AMT-induced CM LDH leakage, n=4. **G** and **I**, Time course  
871 of i[cAMP] levels induced by ISO (10  $\mu$ M) or AMT (10  $\mu$ M) as indicated. ISO- or AMT-induced  
872 i[cAMP] peaked at 5 min. The statistics were performed by comparing to the 0-min time point,  
873 n=4. **H** and **L**, Result of LDH levels in CM supernatants showing that PKA inhibitor PKI 14-22  
874 (PKI, 5  $\mu$ M) significantly reduced LDH leakage induced by ISO (10  $\mu$ M) or AMT (10  $\mu$ M) for 24 h,  
875 n=4. Data were presented as mean  $\pm$  SEM. Data in **Figures S3F** and **S3K** were analyzed by the  
876 Kruskal-Wallis test followed by Conover-Iman post-hoc test with Bonferroni corrections for 3  
877 comparisons, **Figures S3G** and **S3I** by the Kruskal-Wallis test followed by Conover-Iman post-  
878 hoc test with Bonferroni corrections for 4 comparisons, **Figures S3E**, **S3H**, **S3J** and **S3L** by the  
879 two-way ART ANOVA with Bonferroni post-hoc test corrections for 2 comparisons, and **Figures**  
880 **S3A-S3D** by the Mann-Whitney test. All reported P-values have been adjusted for a  
881 predetermined number of multiple comparisons, as specified in the corresponding figures, except  
882 in **Figures S3A-S3D** where raw P-values are reported. P <0.05 was statistically significant. ns:  
883 no significant difference.

884  
885  
886  
887  
888  
889  
890  
891  
892  
893  
894  
895  
896  
897  
898  
899  
900  
901  
902  
903  
904  
905  
906  
907  
908  
909  
910

911  
912  
913  
914  
915  
916  
917  
918  
919  
920  
921  
922  
923  
924  
925  
926  
927  
928  
929  
930  
931  
932  
933  
934  
935  
936  
937  
938  
939  
940  
941  
942  
943  
944  
945  
946  
947  
948  
949  
950  
951  
952  
953  
954  
955  
956  
957  
958  
959  
960  
961

## Figure S4

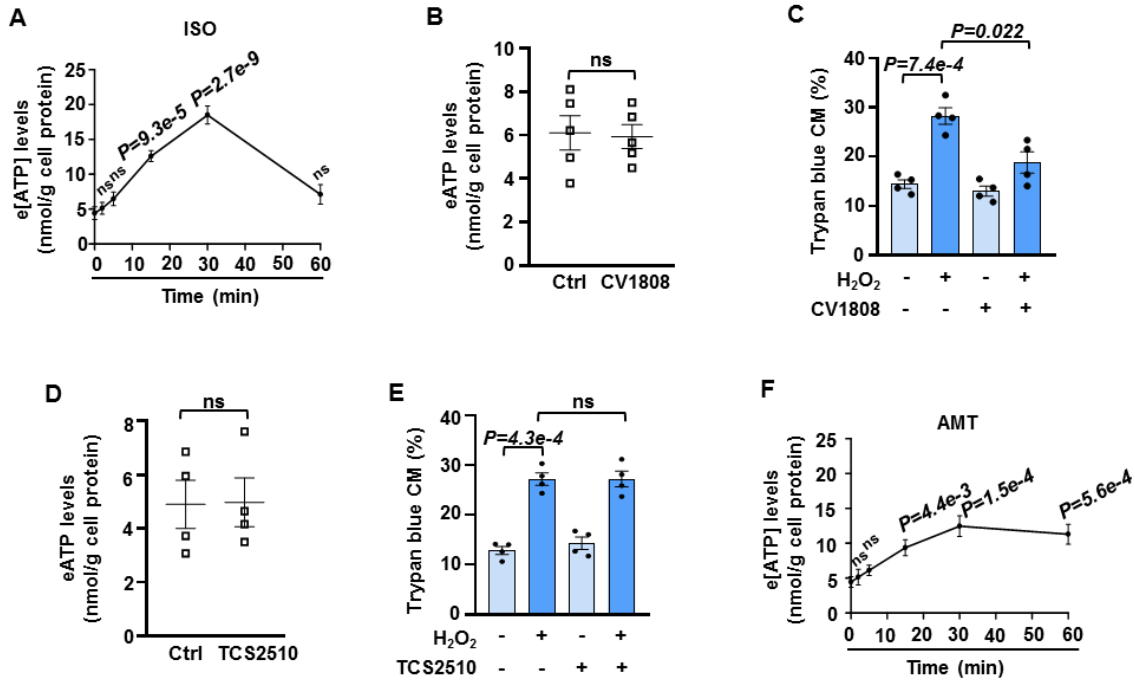

### Figure S4. Time course of $\beta$ 1AR- and H2R-induced e[ATP] in CMs; the effect of A2R or EP4 receptor agonist on CM viability and e[ATP] levels.

**A**, Time course study showing e[ATP] levels induced by ISO (10  $\mu$ M) as indicated. ISO-induced e[ATP] reached a peak at 30 min,  $n=6$ . The statistics were performed by comparing to the 0-min time point. **B**, Results of e[ATP] levels in CM supernatants showing that A2R agonist CV1808 (1  $\mu$ M for 30 min) did not significantly affect ATP efflux from CMs,  $n=5$ . **C**, Quantitative results of trypan blue exclusion showing that CV1808 (1  $\mu$ M) significantly inhibited CM death induced by H<sub>2</sub>O<sub>2</sub> (5  $\mu$ M for 24 h),  $n=4$ . **D**, Results of e[ATP] levels in CM supernatants showing that EP4 receptor agonist TCS2510 (1  $\mu$ M) did not significantly affect ATP efflux from CMs,  $n=4$ . **E**, Quantitative results of trypan blue exclusion assay show that TCS2510 (1  $\mu$ M) did not affect H<sub>2</sub>O<sub>2</sub>-induced CM death,  $n=4$ . **F**, Time course study showing e[ATP] levels induced by AMT (10  $\mu$ M) as indicated. AMT sustainedly increased e[ATP],  $n=4$ . The statistics were performed by comparing to the 0-min time point. Data were mean  $\pm$  SEM. Data in **Figure S4A** was analyzed by the one-way ANOVA followed by post-hoc comparisons with Bonferroni corrections for 5 comparisons, **Figures S4C** and **S4E** by the two-way ART ANOVA with Bonferroni post-hoc test corrections for 2 comparisons, **Figures S4B** and **S4D** by the Mann-Whitney test, and **Figure S4F** by the Kruskal-Wallis test followed by Conover-Iman post-hoc test with Bonferroni corrections for 5 comparisons. All reported P-values have been adjusted for a predetermined number of multiple comparisons, as specified in the corresponding figures, except in **Figures S4B** and **S4D** where raw P-values are reported.  $P < 0.05$  was statistically significant. ns: no significant difference.

Figure S5

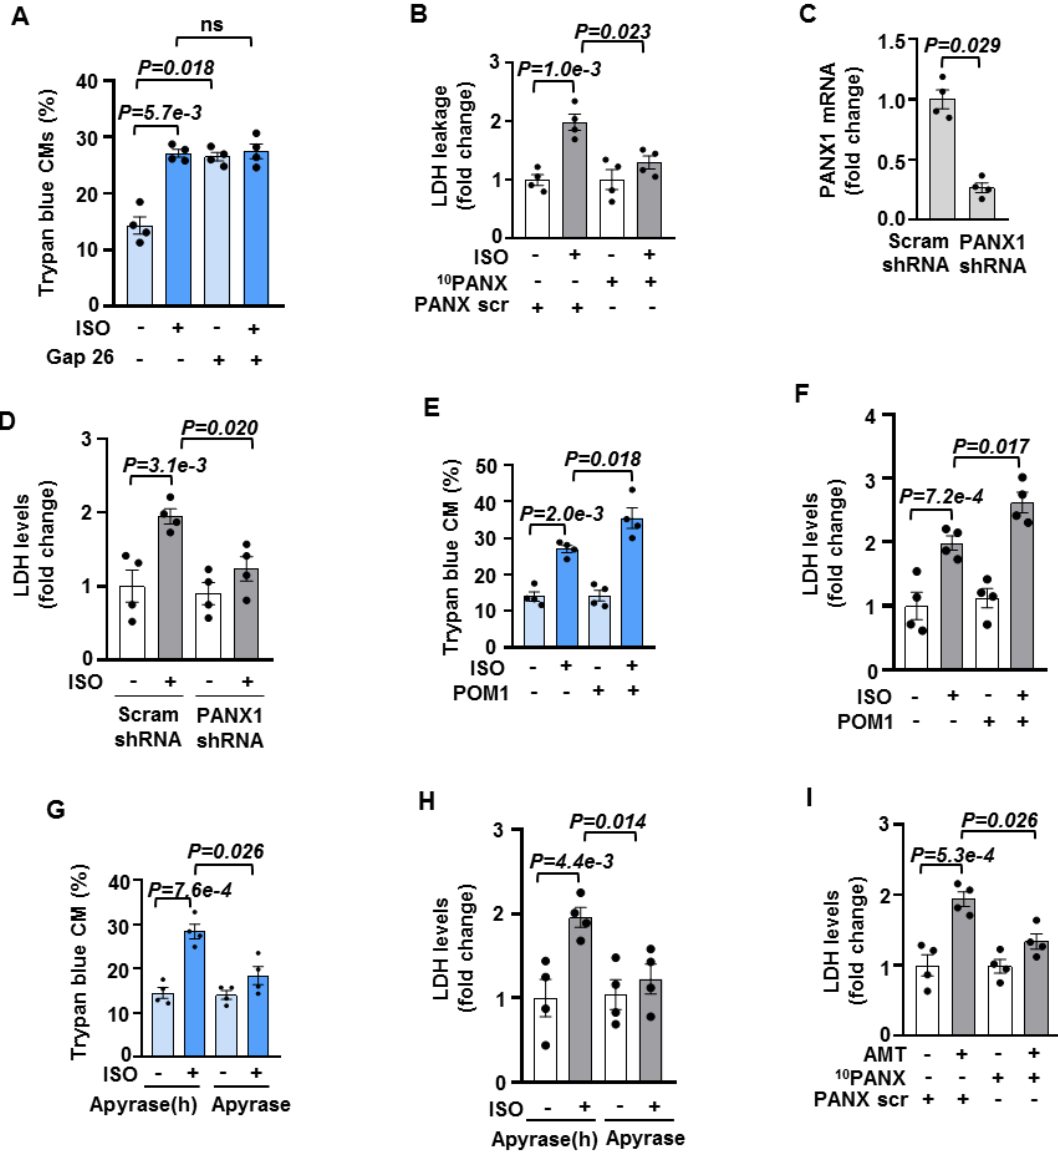

1012 **Figure S5. The effect of connexin 43 inhibitor, PANX1 inhibitor, PANX1 shRNA, CD39**  
1013 **inhibitor, or ATPase on  $\beta$ 1AR- and H2R-induced CM death.**

1014 **A**, Quantitative results of trypan blue exclusion showing that connexin 43 (Cx43) inhibitor Gap 26  
1015 (100  $\mu$ M) directly induced CM death but did not alter CM death induced by ISO (10  $\mu$ M for 24 h),  
1016 n=4. **B**, Results of LDH levels in CM supernatants showing that LDH leakage induced by ISO (10  
1017  $\mu$ M for 24 h) was largely reduced by PANX1 peptide inhibitor  $^{10}$ PANX (100  $\mu$ M) but not scramble  
1018 peptide (PANX scr, 100  $\mu$ M), n=4. **C**, Results of RT-qPCR showing mRNA levels of PANX1 in  
1019 CMs treated with PANX1 shRNA lentivirus. PANX1 shRNA largely reduced PANX1 mRNA  
1020 expression in CMs, n=4. Data were normalized by the housekeeping gene GAPDH. The result  
1021 was presented as the fold change of the control group average. **D**, Results of LDH leakage  
1022 showing that PANX1 shRNA largely reduced ISO-induced LDH leakage, n=4. **E** and **F**,  
1023 Quantitative results of trypan blue exclusion and LDH leakage showing that CD39 inhibitor POM1  
1024 (20  $\mu$ M) enhanced ISO-induced CM death and LDH leakage, n=4. **G** and **H**, Quantitative results  
1025 of trypan blue exclusion and LDH leakage showing that depleting e[ATP] with active apyrase (2  
1026 U/mL) largely inhibited ISO-induced CM death and LDH leakage. Heat inactivate apyrase (h) was  
1027 used as a negative control, n=4. **I**, Results of LDH levels in CM supernatants showing that LDH  
1028 leakage induced by H2R agonist AMT (10  $\mu$ M for 24 h) was largely reduced by  $^{10}$ PANX but not  
1029 PANX scr, n=4. Data were mean  $\pm$  SEM. Data in **Figure S5A** was analyzed by the two-way ART  
1030 ANOVA with Bonferroni post-hoc test corrections for 3 comparisons, **Figures S5B** and **S5D-S5I**  
1031 by the two-way ART ANOVA with Bonferroni post-hoc test corrections for 2 comparisons, and  
1032 **Figure S5C** by the Mann-Whitney test. All reported P-values have been adjusted for a  
1033 predetermined number of multiple comparisons, as specified in the corresponding figures, except  
1034 in **Figure S5C**, where raw P-value is reported. P <0.05 was statistically significant. ns: no  
1035 significant difference.

1036  
1037

1038

1039

1040

1041

1042

1043

1044

1045

1046

1047  
1048  
1049  
1050  
1051  
1052  
1053  
1054  
1055  
1056  
1057  
1058  
1059  
1060  
1061  
1062  
1063  
1064  
1065  
1066  
1067  
1068  
1069  
1070  
1071  
1072  
  
1073  
  
1074  
  
1075  
  
1076  
  
1077  
  
1078  
  
1079  
  
1080  
  
1081

## Figure S6

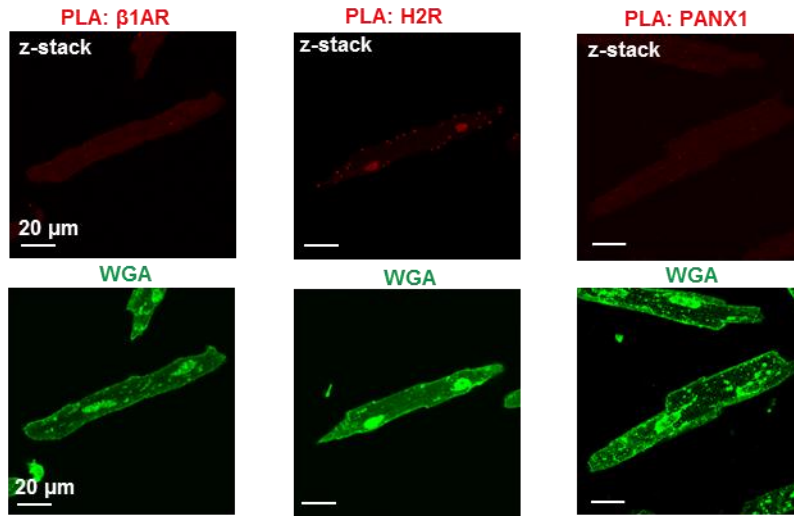

**Figure S6. PLA images of negative controls for PANX1,  $\beta$ 1AR, or H2R in CMs.**

PLA results show negative controls performed with  $\beta$ 1AR, H2R, or PANX1 antibody alone in CMs. WGA images showing CMs in the corresponding fields. There was no significant PLA signal detected in negative controls.

1082 **Figure S7**

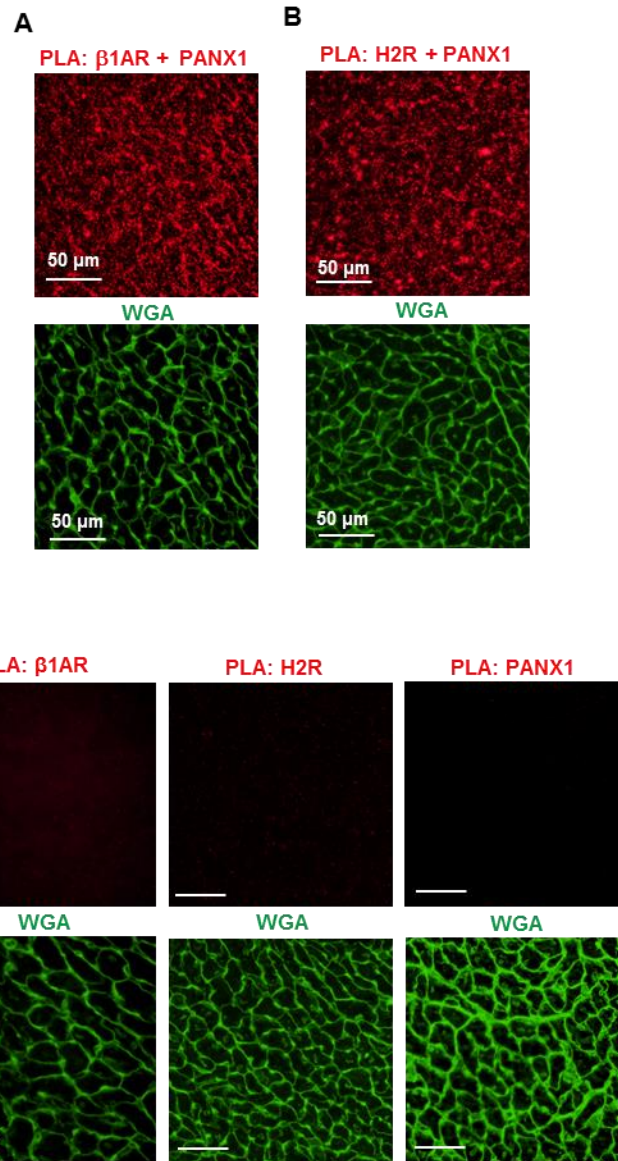

1123 **Figure S7. PLA images of PANX1 with  $\beta$ 1AR or H2R in the heart.**

1124 **A and B**, Images of PLA performed with PANX1 plus  $\beta$ 1AR or H2R antibodies in heart sections.  
1125 There were significant red PLA positive signals detected in the heart. WGA images showing  
1126 myocardium in the corresponding fields. **C**, PLA results showing negative controls performed with  
1127  $\beta$ 1AR, H2R, or PANX1 antibody alone in heart sections. WGA images showing myocardium in  
1128 the corresponding fields. There was no significant PLA signal detected in negative controls.

1133  
1134 **Figure S8**  
1135  
1136  
1137

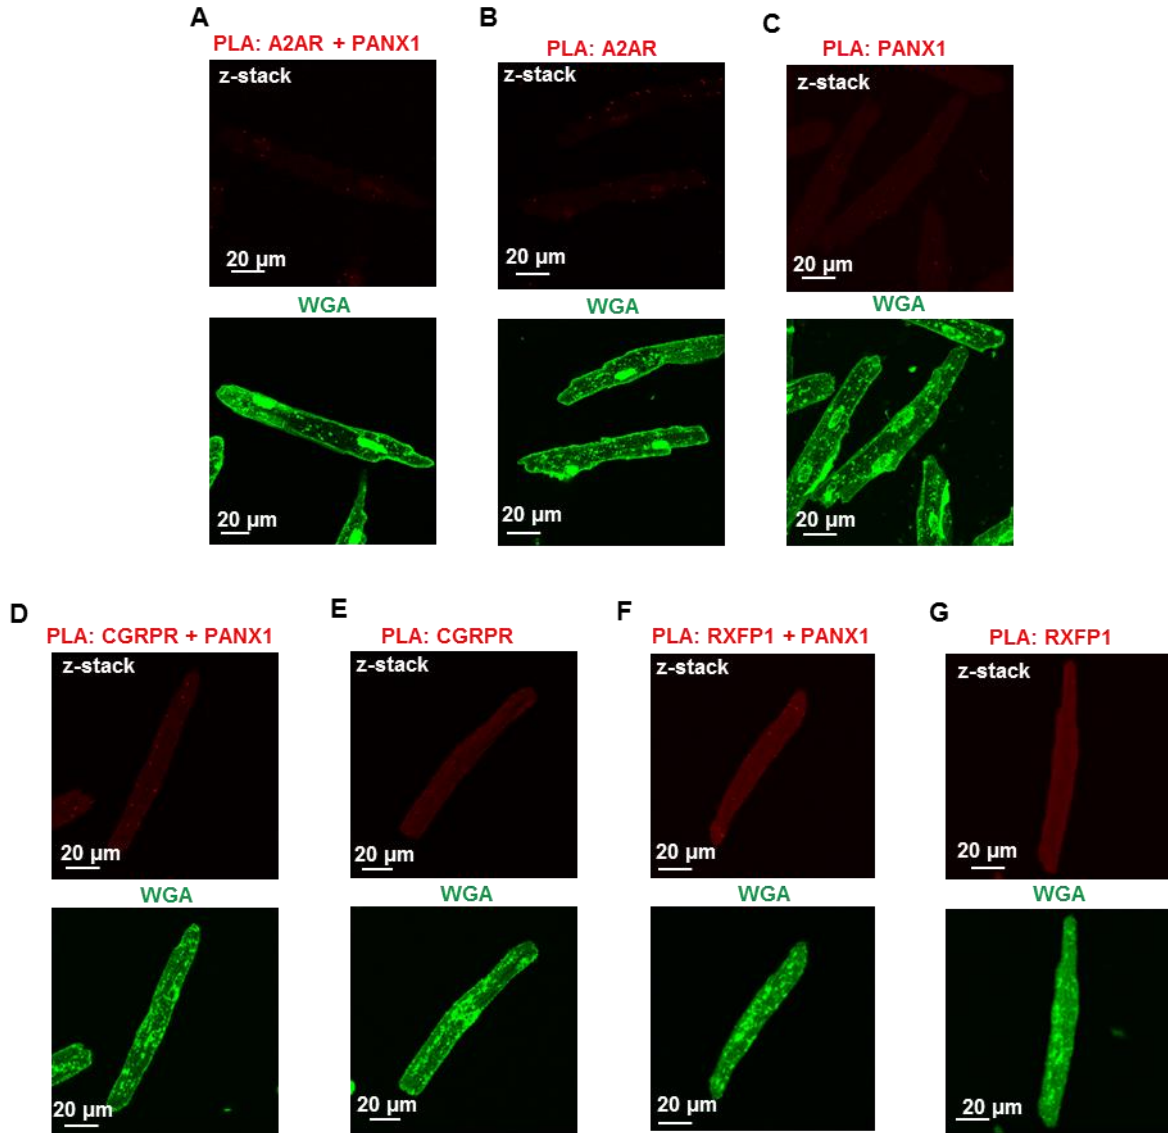

1174 **Figure S8. PLA images of PANX1 with A2AR, CGRPR, or RXFP1 and their negative**  
1175 **controls in CMs.**

1176 **A, D, and F,** Images of PLA performed with PANX1 plus A2AR, CGRPR, or RXFP1 antibodies  
1177 together in CMs. WGA images showing CMs in the corresponding fields. No significant PLA  
1178 positive signals detected PANX1 with A2AR, CGRPR, or RXFP1, indicating no apparent  
1179 interaction between PANX1 and A2AR, CGRPR, or RXFP1 detected. **B, C, E, and G,** PLA  
1180 results showing negative controls performed with A2AR, PANX1, CGRPR, or RXFP1 antibody  
1181 alone in CMs. WGA images showing CMs in the corresponding fields. There was no significant  
1182 PLA signal detected in negative controls.  
1183



1184  
1185  
1186  
1187  
1188  
1189  
1190  
1191  
1192  
1193  
1194  
1195  
1196  
1197  
1198  
1199  
1200  
1201  
1202  
1203  
1204  
1205  
1206  
1207  
1208  
1209  
1210  
1211  
1212  
1213  
1214  
1215  
  
1216  
  
1217  
  
1218  
  
1219  
  
1220  
  
1221  
  
1222

## Figure S9

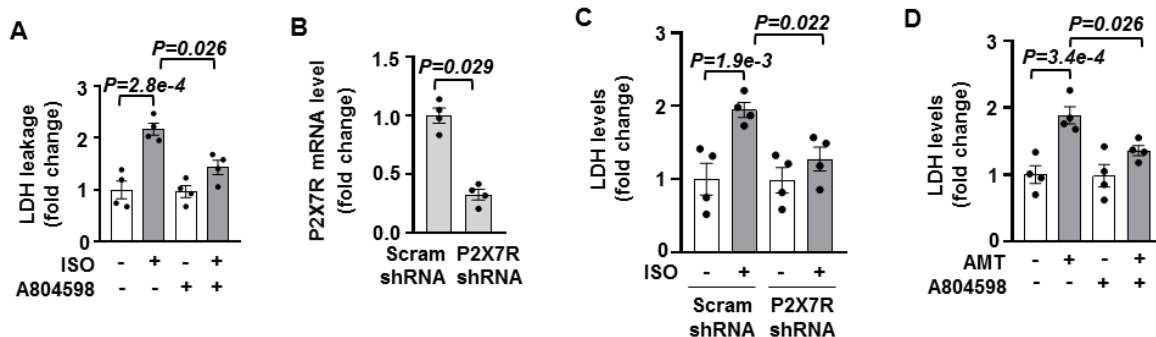

**Figure S9. The role of P2X7R in  $\beta$ 1AR- or H2R-induced CM death using P2X7R shRNA or antagonist.**

**A**, Results of LDH levels in CM supernatants showing that P2X7R antagonist A804598 (1  $\mu$ M) significantly inhibited LDH leakage induced by ISO (10  $\mu$ M for 24 h),  $n=4$ . **B**, Results of RT-qPCR showing mRNA levels of P2X7R in CMs treated with P2X7R shRNA lentivirus. P2X7R shRNA largely reduced P2X7R mRNA expression in CMs,  $n=4$ . Data were normalized by the housekeeping gene GAPDH. The result was presented as the fold change of the control group average. **C**, Results of LDH leakage showing that P2X7R shRNA largely reduced ISO-induced LDH leakage,  $n=4$ . **D**, Results of LDH levels in CM supernatants showing that A804598 largely inhibited AMT-induced LDH leakage,  $n=4$ . Data were presented as mean  $\pm$  SEM. Data in **Figures S9A**, **S9C**, and **S9D** were statistically analyzed by the two-way ART ANOVA with Bonferroni post-hoc test corrections for 2 comparisons, and **Figure S9B** by the Mann-Whitney test. All reported P-values have been adjusted for a predetermined number of multiple comparisons, as specified in the corresponding figures, except in **Figure S9B**, where raw P-value is reported.  $P < 0.05$  was statistically significant.

1223 **Figure S10**

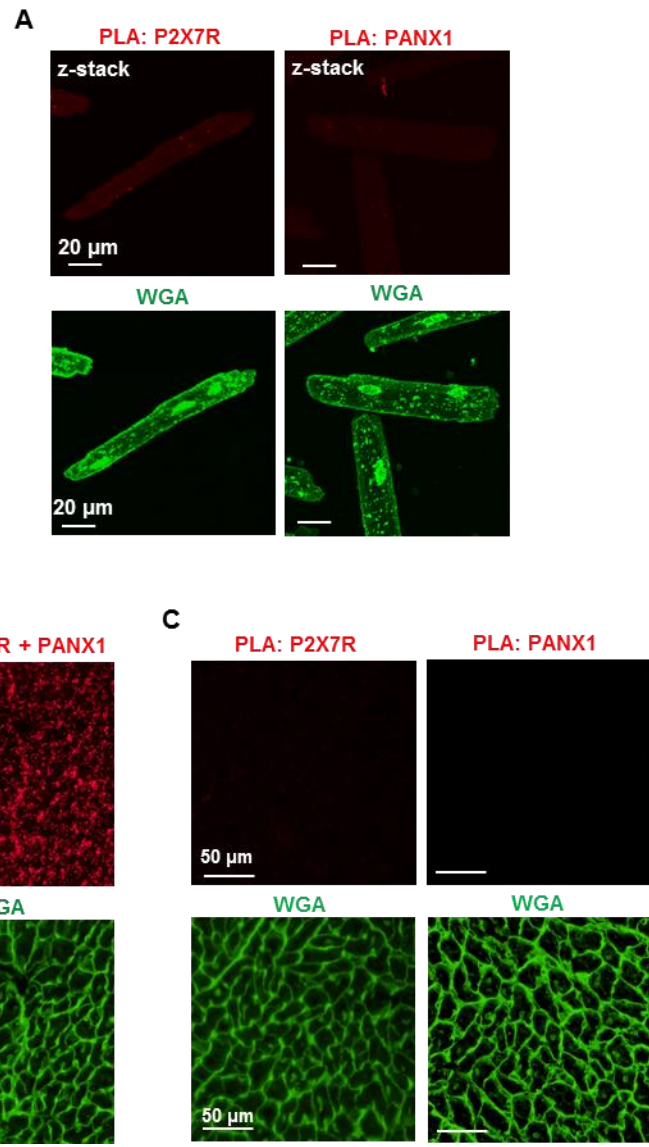

1263 **Figure S10. PLA images of PANX1 with P2X7R and their negative controls in CMs or hearts.**  
1264 **A**, PLA results showing negative controls performed with P2X7R or PANX1 antibody alone in  
1265 CMs. WGA images showing CMs in the corresponding fields. There was no significant PLA signal  
1266 detected in negative controls. **B**, Image of PLA performed by P2X7R plus PANX1 antibodies  
1267 together in heart sections. There were significant red PLA positive signals detected in the heart.  
1268 WGA image showing myocardium in the corresponding fields. **C**, PLA results showing negative  
1269 controls performed with P2X7R or PANX1 antibody alone in heart sections. WGA image showing  
1270 myocardium in the corresponding fields. There was no significant PLA signal detected in negative  
1271 controls.

1274  
1275  
1276  
1277  
1278  
1279  
1280  
1281  
1282  
1283  
1284  
1285  
1286  
1287  
1288  
1289  
1290  
1291  
1292  
1293  
1294  
1295  
1296  
1297  
1298  
1299  
1300  
1301  
1302  
1303  
1304  
1305  
1306  
1307  
1308  
1309  
1310  
1311  
1312  
1313  
1314  
1315  
1316  
  
1317  
  
1318  
  
1319

# Figure S11

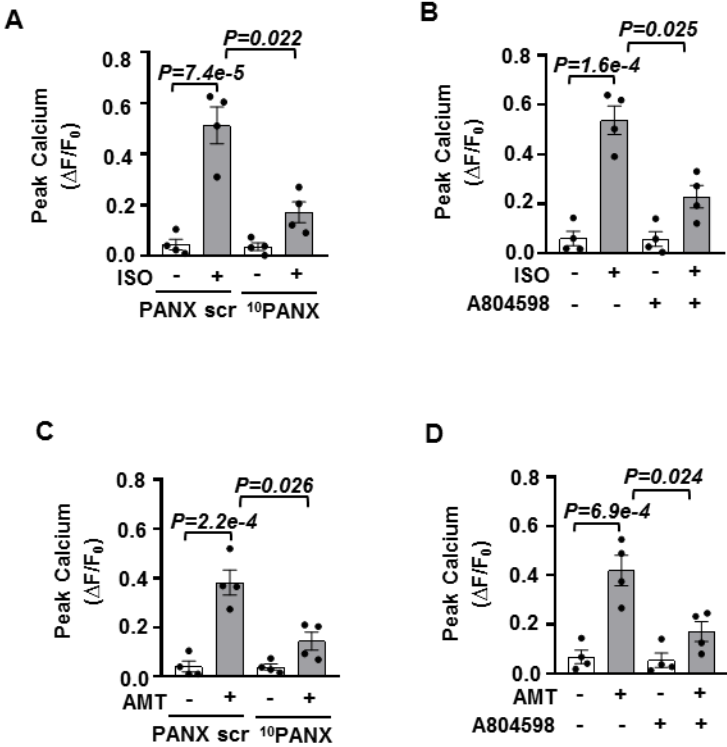

**Figure S11. The role of PANX1 or P2X7R in  $\beta$ 1AR- or H2R-induced calcium change in CMs.**

Fluo-4 was used for evaluating intracellular calcium change in CMs; the result was calculated as the peak change of Fluo-4 fluorescence intensity versus that at 0 min ( $\Delta F/F_0$ ). Approximately 40 CMs from each sample were used for data collection. **A** and **C**, Results of calcium changes show that ISO (10  $\mu$ M) or AMT (10  $\mu$ M) significantly increased intracellular calcium in CMs, which was largely reduced by PANX1 peptide inhibitor <sup>10</sup>PANX (100  $\mu$ M) but not scramble peptide (PANX scr, 100  $\mu$ M), n=4. **B** and **D**, Results of calcium changes show that ISO- or AMT-induced calcium was largely reduced by P2X7R antagonist A804598 (1  $\mu$ M), n=4. Data were presented as mean  $\pm$  SEM. Data in **Figures S11A-S11D** were statistically analyzed by the two-way ART ANOVA with Bonferroni post-hoc test corrections for 2 comparisons. All reported P-values have been adjusted for a predetermined number of multiple comparisons, as specified in the corresponding figures. P <0.05 was statistically significant.

1320

Figure S12

1321  
1322  
1323  
1324  
1325  
1326  
1327  
1328  
1329  
1330  
1331  
1332  
1333  
1334  
1335  
1336  
1337  
1338  
1339  
1340  
1341  
1342  
1343  
1344  
1345  
1346  
1347  
1348  
1349  
1350  
1351  
1352  
1353  
1354  
1355  
1356  
1357  
1358  
1359  
1360  
1361  
1362  
1363  
1364  
1365  
1366  
1367

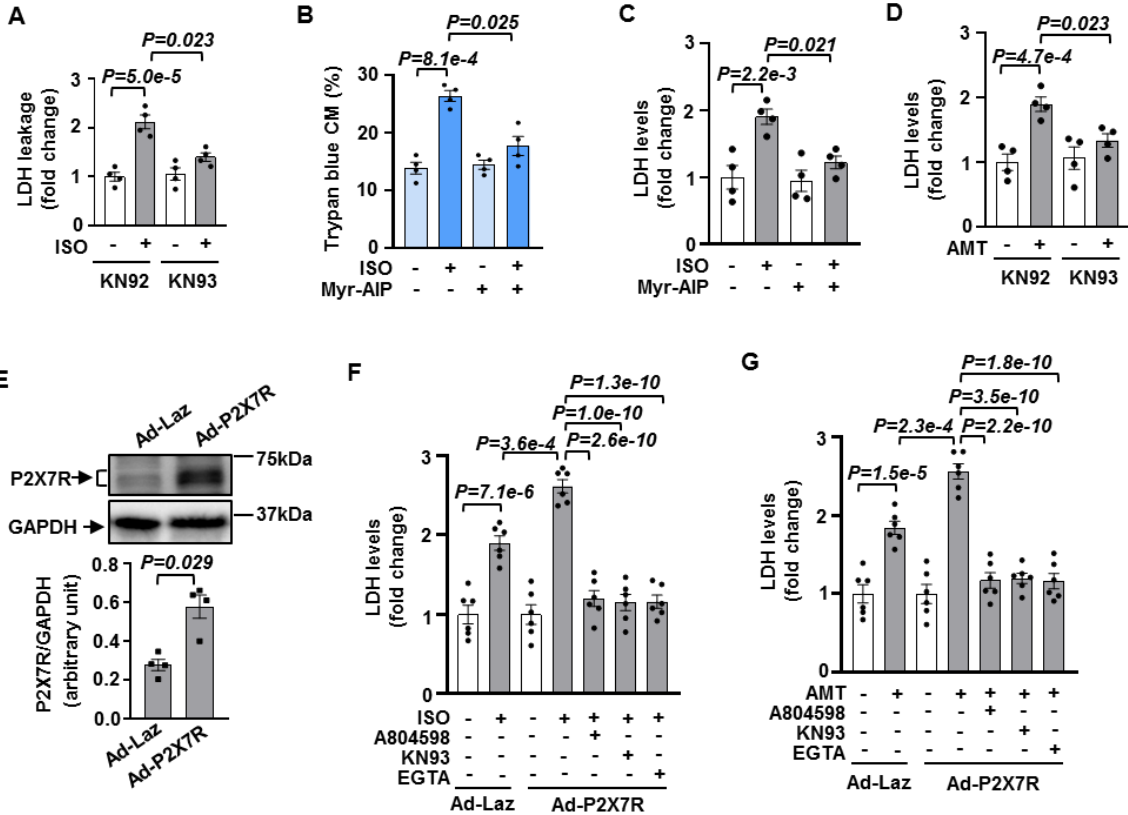

1368 **Figure S12. The effect of CaMKII or P2X7R inhibition on  $\beta$ 1AR- or H2R-induced CM death;**  
1369 **the effect of P2X7R overexpression on  $\beta$ 1AR- or H2R-induced CM death.**  
1370 **A and D,** Results of LDH leakage showing that CaMKII inhibitor KN93 (2  $\mu$ M) significantly reduced  
1371 LDH leakage induced by ISO (10  $\mu$ M for 24 h) or AMT (10  $\mu$ M for 24 h) in CMs, but the control  
1372 inhibitor KN92 (2  $\mu$ M) did not, n=4. **B and C,** Results of trypan blue exclusion assay and LDH  
1373 leakage showing that CaMKII peptide inhibitor myr-AIP (autocamtide-2-related inhibitory peptide  
1374 myristoylated, 2  $\mu$ M) inhibited ISO-induced CM death and LDH leakage, n=4. **E,** Results of P2X7R  
1375 protein levels showing that P2X7R protein expression was largely increased in CMs treated with  
1376 human P2X7R adenovirus (Ad-P2X7R) compared with Laz adenovirus (Ad-LacZ), n=4. Data were  
1377 normalized to GAPDH. **F and G,** Effects of A804598 (1  $\mu$ M), KN93 or calcium chelate EGTA (1  
1378  $\mu$ M) on ISO- or AMT-induced LDH leakage in CMs ectopically expressing Laz or human P2X7R  
1379 via adenovirus. P2X7R overexpression via adenovirus enhanced ISO- or AMT-induced LDH  
1380 leakage, and P2X7R inhibition, CaMKII inhibition, or calcium chelate largely blocked ISO- or AMT-  
1381 induced LDH leakage, n=6. The representative images were chosen based on their quality and  
1382 to most accurately reflect the group average across all the available data. Data were presented  
1383 as mean  $\pm$  SEM. Data in **Figures S12F and S12G** were statistically analyzed by the one-way  
1384 ANOVA followed by post-hoc comparisons with Bonferroni corrections for 5 comparisons,  
1385 **Figures S12A-S12D** by the two-way ART ANOVA with Bonferroni post-hoc test corrections for 2  
1386 comparisons, and **Figure S12E** by the Mann-Whitney test. All reported P-values have been  
1387 adjusted for a predetermined number of multiple comparisons, as specified in the corresponding  
1388 figures, except in **Figure S12E**, where raw P-value is reported. P <0.05 was statistically significant.  
1389

1390

1391

1392

1393

1394

1395

1396

1397

1398

1399

1400

1401 **Figure S13**

1402

1403

1404

1405

1406

1407

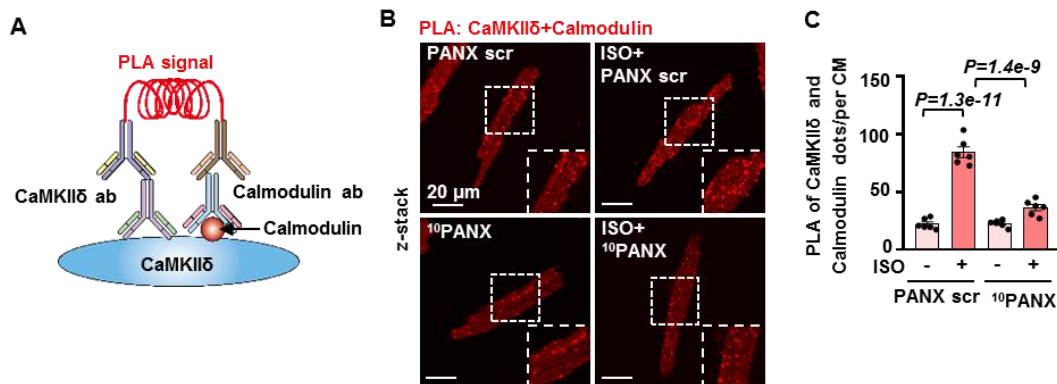

1408

1409

1410

1411

1412

1413

1414

1415

1416

1417

1418

1419

1420

1421

1422

1423

1424

1425

1426

1427

1428

1429

1430

1431

1432

1433

1434

1435

1436

1437

1438

1439

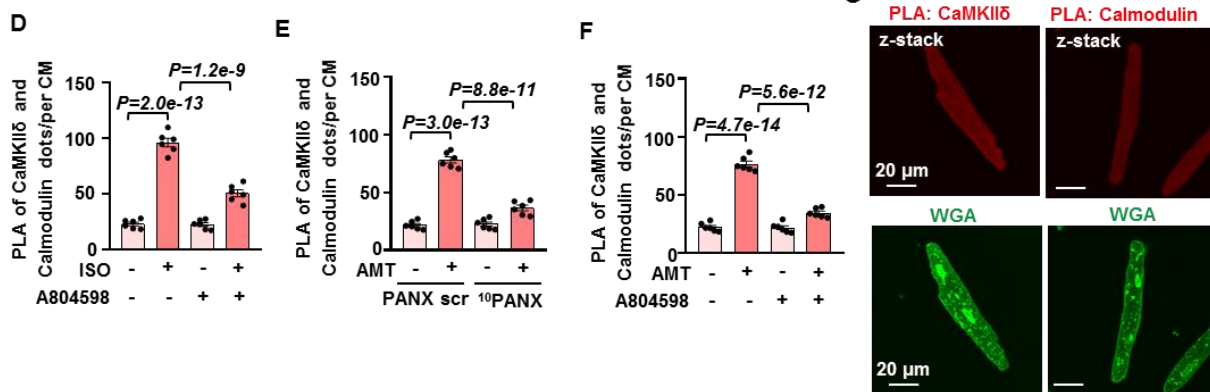

1440 **Figure S13. The role of PANX1 and P2X7R in  $\beta$ 1AR- or H2R-induced CaMKII activation.**  
1441 **A**, Schematic diagram showing the PLA principle for detecting CaMKII $\delta$  binding with calmodulin  
1442 to reflect CaMKII activation using CaMKII $\delta$  and calmodulin antibodies. **B** and **C**, PLA images and  
1443 quantitative results showing CaMKII $\delta$  binding with calmodulin in CMs treated with ISO (10  $\mu$ M for  
1444 30 min) with PANX1 peptide inhibitor <sup>10</sup>PANX (100  $\mu$ M) or scramble peptide (PANX scr, 100  $\mu$ M).  
1445 Insets are zoomed areas with white dash lines. ISO significantly induced CaMKII $\delta$  binding with  
1446 calmodulin in CMs, and 10PANX, but not PANX scr, largely inhibited ISO-induced CaMKII $\delta$   
1447 binding with calmodulin, n=6. **D**, Quantitative results showing that P2X7R antagonist A804598 (1  
1448  $\mu$ M) largely inhibited ISO-induced CaMKII $\delta$  binding with calmodulin, n=6. **E**, Quantitative results  
1449 showing that AMT (10  $\mu$ M for 30 min) significantly stimulated CaMKII $\delta$  binding with calmodulin in  
1450 CMs, and 10PANX, but not PANX scr, largely inhibited AMT-induced CaMKII $\delta$  binding with  
1451 calmodulin, n=6. **F**, Quantitative results showing that A804598 largely inhibited AMT-induced  
1452 CaMKII $\delta$  binding with calmodulin, n=6. **G**, Images of PLA negative controls performed by CaMKII $\delta$   
1453 or calmodulin antibody alone in CMs. WGA images showing CMs in the corresponding fields.  
1454 There was no significant PLA signal detected in negative controls. The representative images of  
1455 PLA quantitative results were chosen based on their quality and to most accurately reflect the  
1456 group average across all the available data. Data were presented as mean  $\pm$  SEM. Data in  
1457 **Figures S13C-S13F** were statistically analyzed by the two-way ANOVA followed by post-hoc  
1458 comparisons with Bonferroni corrections for 2 comparisons. All reported P-values have been  
1459 adjusted for a predetermined number of multiple comparisons, as specified in the corresponding  
1460 figures. P <0.05 was statistically significant.

1461  
1462  
1463  
1464  
1465  
1466  
1467  
1468  
1469  
1470  
1471  
1472  
1473  
1474  
1475  
1476  
1477  
1478  
1479  
1480  
1481  
1482  
1483  
1484  
1485  
1486  
1487  
1488  
1489  
1490  
1491  
1492  
1493  
1494  
1495  
1496  
1497  
1498  
1499  
1500  
1501  
1502  
1503  
1504  
1505  
1506  
1507  
1508  
1509

# Figure S14

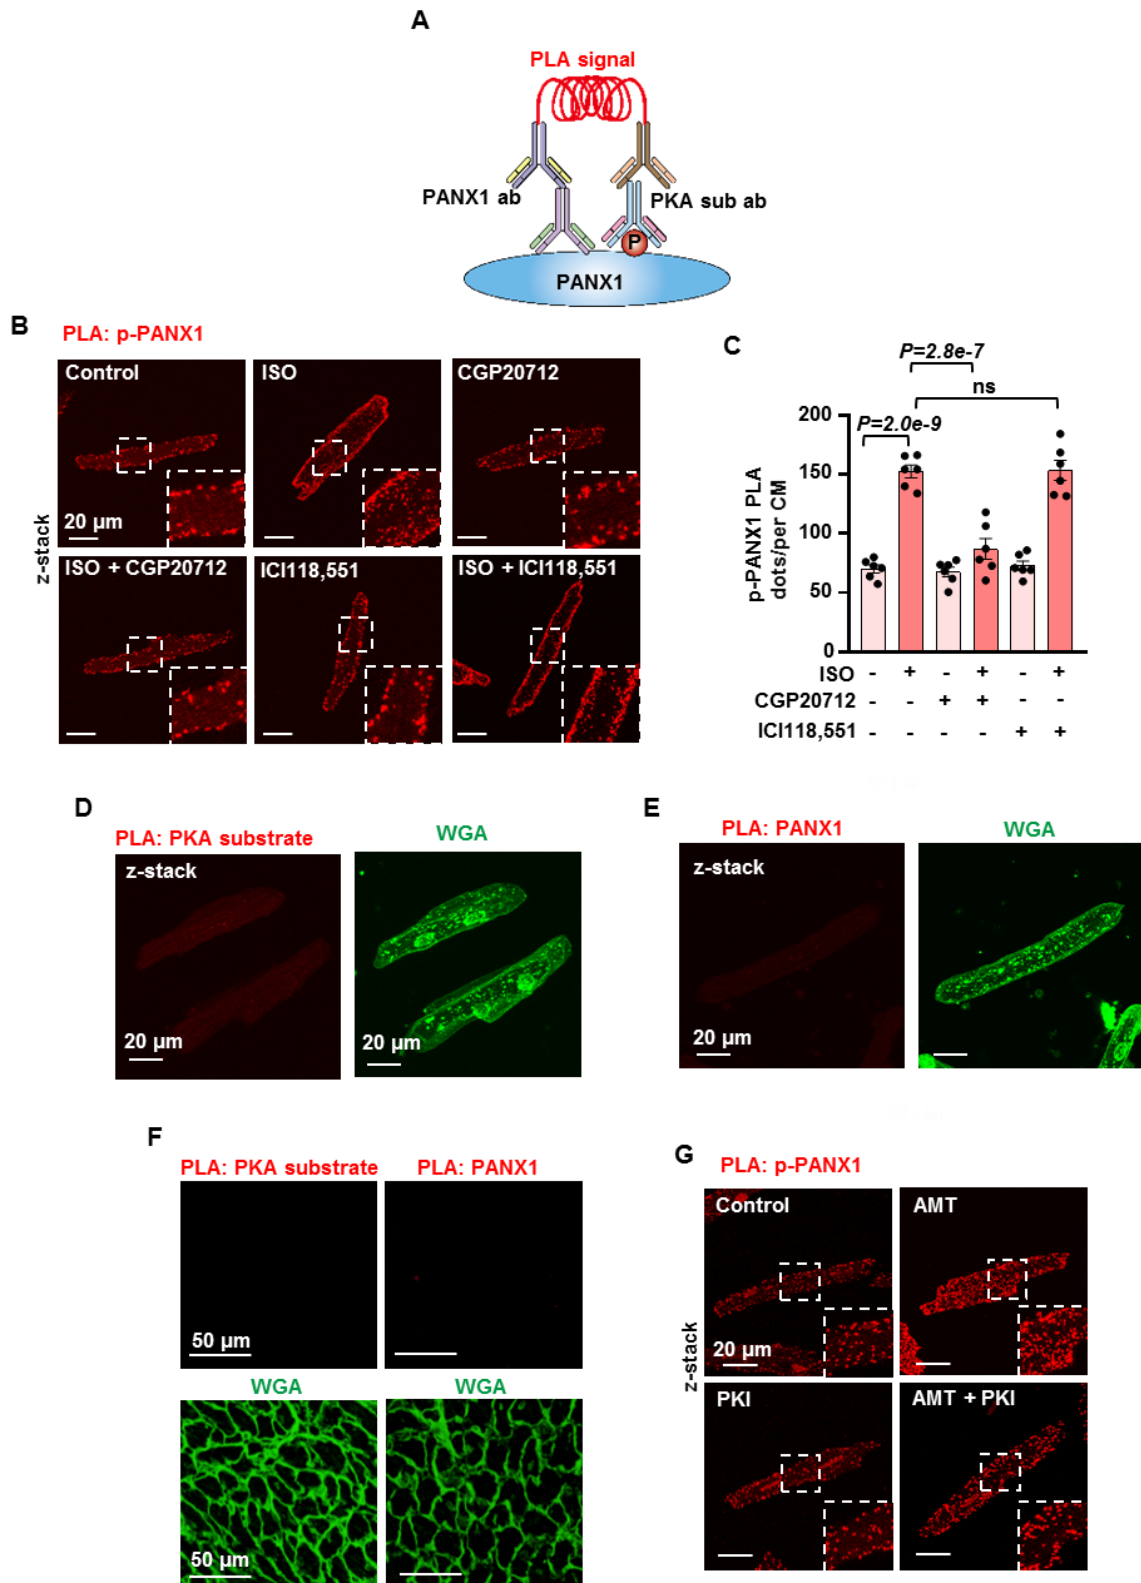



1510 **Figure S14. The role of  $\beta$ 1AR or  $\beta$ 2AR in ISO-induced PKA-mediated PANX1**  
1511 **phosphorylation in CMs; PLA negative controls for PANX1 phosphorylation in CMs and**  
1512 **heart; PLA results of PANX1 phosphorylation induced by AMT.**

1513 **A**, Schematic diagram showing the PLA principle for detecting PANX1 phosphorylation using  
1514 PANX1 and PKA-substrate antibodies. **B** and **C**, PLA images and quantitative results showing  
1515 PKA-mediated PANX1 phosphorylation in CMs treated with ISO (10  $\mu$ M for 30 min) with or without  
1516  $\beta$ 1AR antagonist CGP20712 (0.5  $\mu$ M) or  $\beta$ 2AR antagonist ICI118,551 (0.5  $\mu$ M). Insets are  
1517 zoomed areas with white dash lines.  $\beta$ 1AR inhibition, but not  $\beta$ 2AR inhibition, significantly reduced  
1518 ISO-induced p-PANX1, n=6. **D** and **E**, Images of PLA negative controls performed by PKA  
1519 substrate or PANX1 antibody alone in CMs. WGA images showing CMs in the corresponding  
1520 fields. There was no significant PLA signal detected in negative controls. **F**, PLA results showing  
1521 negative controls performed with PKA substrate or PANX1 antibody alone in heart sections. WGA  
1522 images showing myocardium in the corresponding fields. There was no significant PLA signal  
1523 detected in the heart. **G**, PLA images showing PKA-mediated PANX1 phosphorylation in CMs  
1524 treated with H2R agonist AMT (10  $\mu$ M for 30 min) with or without PKA inhibitor PKI (5  $\mu$ M). Insets  
1525 are zoomed areas with white dash lines, n=6. The representative images of PLA quantitative  
1526 results were chosen based on their quality and to most accurately reflect the group average  
1527 across all the available data. Data were presented as mean  $\pm$  SEM. Data in **Figure S14C** was  
1528 statistically analyzed by the one-way ANOVA followed by post-hoc comparisons with Bonferroni  
1529 corrections for 3 comparisons. All reported P-values have been adjusted for a predetermined  
1530 number of multiple comparisons, as specified in the corresponding figures. P <0.05 was  
1531 statistically significant. ns: no significant difference.

1532  
1533  
1534

1535

1536

1537

1538

1539

1540

1541

1542

1543

Figure S15

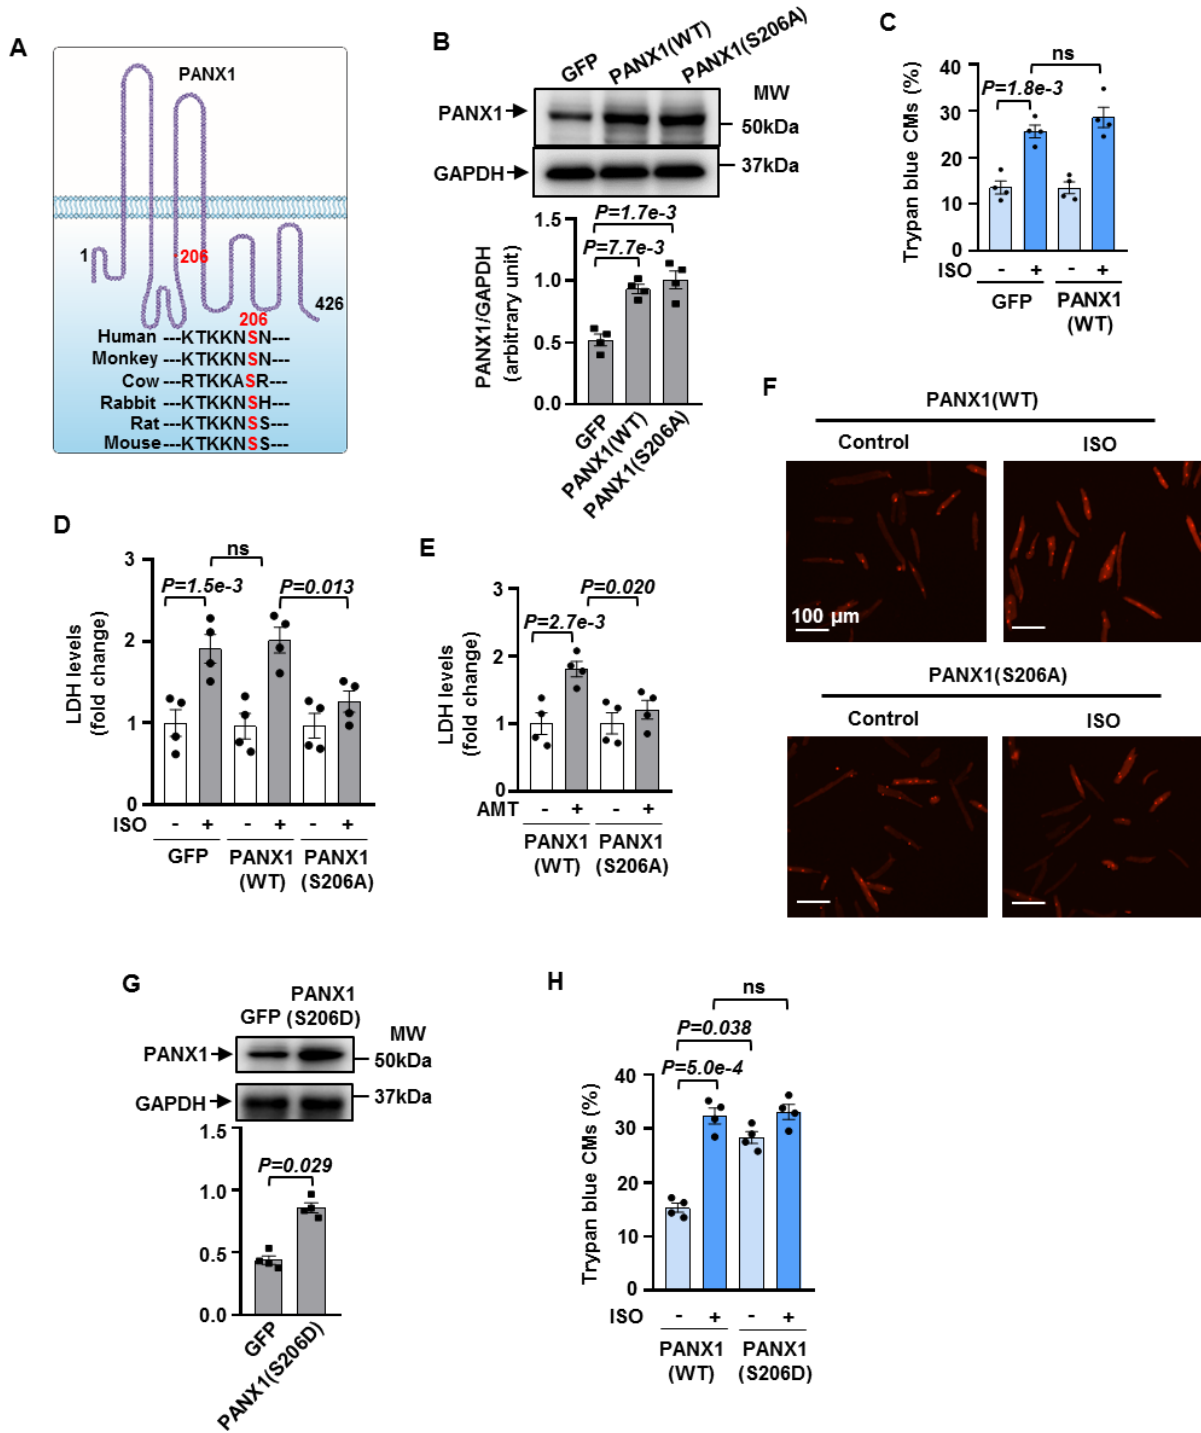

1545 **Figure S15. The role of PANX1 phosphorylation at Ser206 in  $\beta$ AR- or H2R-induced CM**  
1546 **death and PANX1 activation.**

1547 **A**, Diagram showing the PANX1 structure with a putative PKA phosphorylation site at Ser206 that  
1548 is conserved among different species. **B**, Western blots and quantitative results showing PANX1  
1549 protein levels in CMs treated with GFP, PANX1(WT), or PANX1(S206A) lentivirus. PANX1(WT)  
1550 and PANX1(S206A) lentivirus increased PANX1 protein to similar levels in CM total lysates, n=4.  
1551 Data were normalized to GAPDH. **C**, Quantitative results of trypan blue exclusion assay showing  
1552 that CM death induced by ISO (10  $\mu$ M for 24 h) was similar in CMs expressing GFP or PANX1(WT)  
1553 via lentivirus, n=4. **D**, Results of LDH leakage showing that ISO-induced LDH leakage was similar  
1554 in CMs expressing GFP or PANX1(WT) via lentivirus, and LDH leakage was significantly reduced  
1555 in CMs expressing PANX1(S206A) via lentivirus, n=4. **E**, Results of LDH leakage showing that  
1556 LDH leakage induced by H2R agonist AMT (10  $\mu$ M for 24 h) was significantly attenuated in CMs  
1557 expressing PANX1(S206A) via lentivirus, n=4. **F**, Representative images of YO-PRO3 (1  $\mu$ M)  
1558 influx in CMs transfected with PANX1(WT) or PANX1(S206A) lentivirus in the presence or  
1559 absence of ISO (10  $\mu$ M) for 20 min. The cellular red signals in CMs reflected YO-PRO3 influx. An  
1560 average of 200 CMs/each isolation was counted to evaluate YO-PRO3 influx, n=6. **G**, Western  
1561 blots and quantitative results showing PANX1 protein levels in CMs treated with GFP or  
1562 PANX1(S206D) lentivirus. PANX1(S206D) lentivirus increased PANX1 protein in CM total lysates,  
1563 n=4. Data were normalized to GAPDH. **H**, Quantitative results of trypan blue exclusion showing  
1564 that PANX1(S206D) expression directly induced CM death but did not alter ISO-induced CM  
1565 death, n=4. The representative images were chosen based on their quality and to most accurately  
1566 reflect the group average across all the available data. Data were presented as mean  $\pm$  SEM.  
1567 Data in **Figure S15B** was analyzed by the Kruskal-Wallis test followed by Conover-Iman post-hoc  
1568 test with Bonferroni corrections for 2 comparisons, **Figure S15D** by the Kruskal-Wallis test  
1569 followed by Conover-Iman post-hoc test with Bonferroni corrections for 3 comparisons, **Figures**  
1570 **S15C**, **S15E** by the two-way ART ANOVA with Bonferroni post-hoc test corrections for 2  
1571 comparisons, **Figure S15H** by the two-way ART ANOVA with Bonferroni post-hoc test corrections  
1572 for 3 comparisons, and **Figure S15G** by the Mann-Whitney test. All reported P-values have been  
1573 adjusted for a predetermined number of multiple comparisons, as specified in the corresponding  
1574 figures, except in **Figure S15G** where raw P-value is reported. P <0.05 was statistically significant.  
1575 ns: no significant difference.

1576  
1577

1578

1579

1580

1581

1582

1583

1584  
1585  
1586  
1587  
1588  
1589  
1590  
1591  
1592  
1593  
1594  
1595  
1596  
1597  
1598  
1599  
1600  
1601  
1602  
1603  
1604  
1605  
1606  
1607  
1608  
1609  
1610  
1611  
1612  
1613  
1614  
1615  
1616  
1617  
1618  
1619  
1620  
1621  
1622  
1623  
1624  
1625  
1626  
1627  
1628  
1629  
1630  
1631  
1632  
1633  
1634

## Figure S16

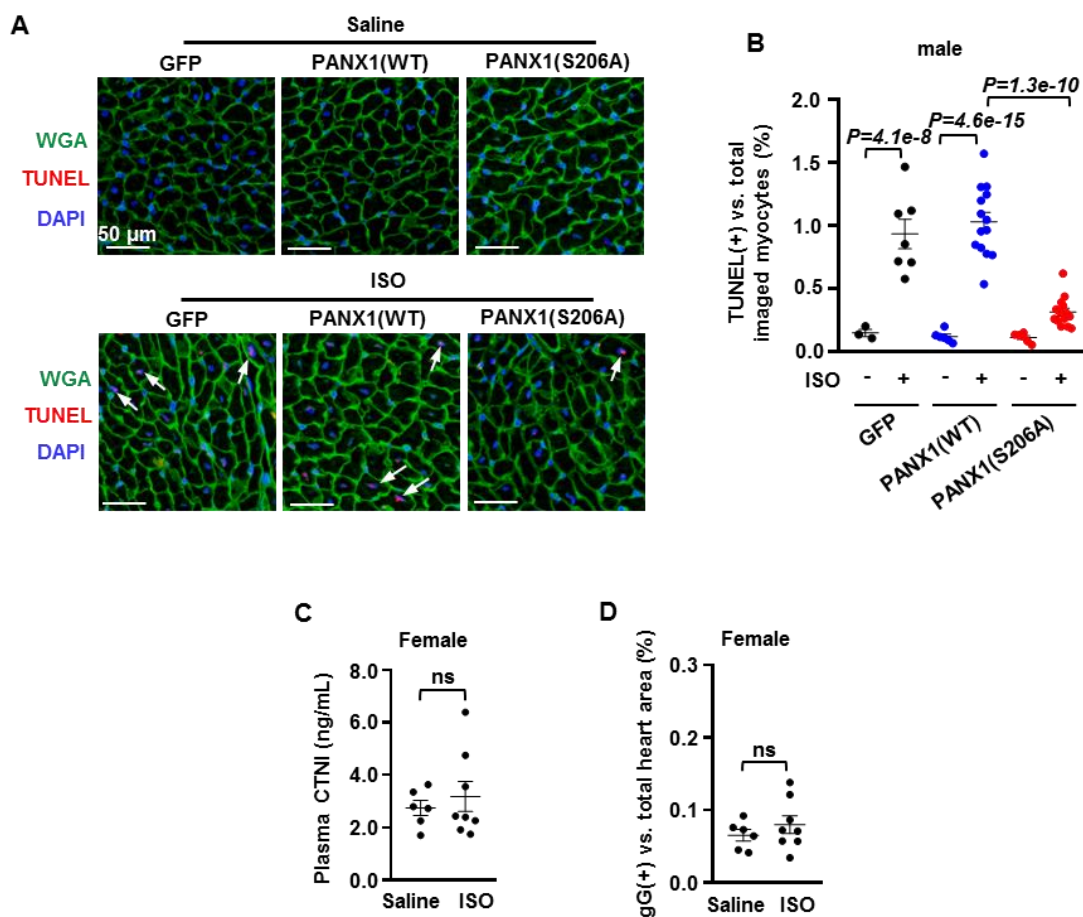

### Figure S16. The role of PANX1 phosphorylation at Ser206 in ISO-induced CM apoptosis in male mice; the effect of ISO acute treatment on female mice heart.

**A** and **B**, Images and quantitative results of TUNEL staining showing PANX1 phosphorylation site mutation significantly reduced ISO-induced CM apoptosis in male mouse hearts. White arrows indicated apoptotic myocardia with TUNEL-positive nuclei. DAPI indicated nuclei, and WGA indicated myocardium in the corresponding fields of heart sections,  $n=3$  (Vehicle/GFP), 7 (ISO/GFP), 6 (Vehicle/PANX1(WT)), 14 (ISO/PANX1(WT)), 6 (Vehicle/PANX1(S206A)), and 14 (ISO/PANX1(S206A)). **C** and **D**, Results of plasma cardiac troponin I (cTNI) levels and myocardial IgG accumulation in female mice. There were no significant changes in plasma cTNI and myocardial IgG staining in female mice with ISO treatment (100 mg/kg, every 8 h twice in 24 h s.c.),  $n=6$  (saline), and 8 (ISO). The representative images were chosen based on their quality and to most accurately reflect the group average across all the available data. Data were presented as mean  $\pm$  SEM. Data in **Figure S16B** were analyzed by the Kruskal-Wallis test followed by Conover-Iman post-hoc test with Bonferroni corrections for 3 comparisons, **Figures S16C** and **S16D** by the unpaired t-test. The P-value in **Figure S16B** has been adjusted for a predetermined number of multiple comparisons, as specified in the figure, and the raw P-values of **Figures S16C** and **S16D** are reported.  $P<0.05$  was statistically significant. ns: no significant difference.

1635  
1636  
1637  
1638  
1639  
1640  
1641  
1642  
1643  
1644  
1645  
1646  
1647  
1648  
1649  
1650  
1651  
1652  
1653  
1654  
1655  
1656  
1657  
1658  
1659  
1660  
1661  
1662  
1663  
1664  
1665  
1666  
1667  
1668  
1669  
1670  
1671  
1672  
1673  
1674  
1675  
1676  
1677  
1678  
1679  
1680  
1681  
1682  
1683  
1684

Figure S17

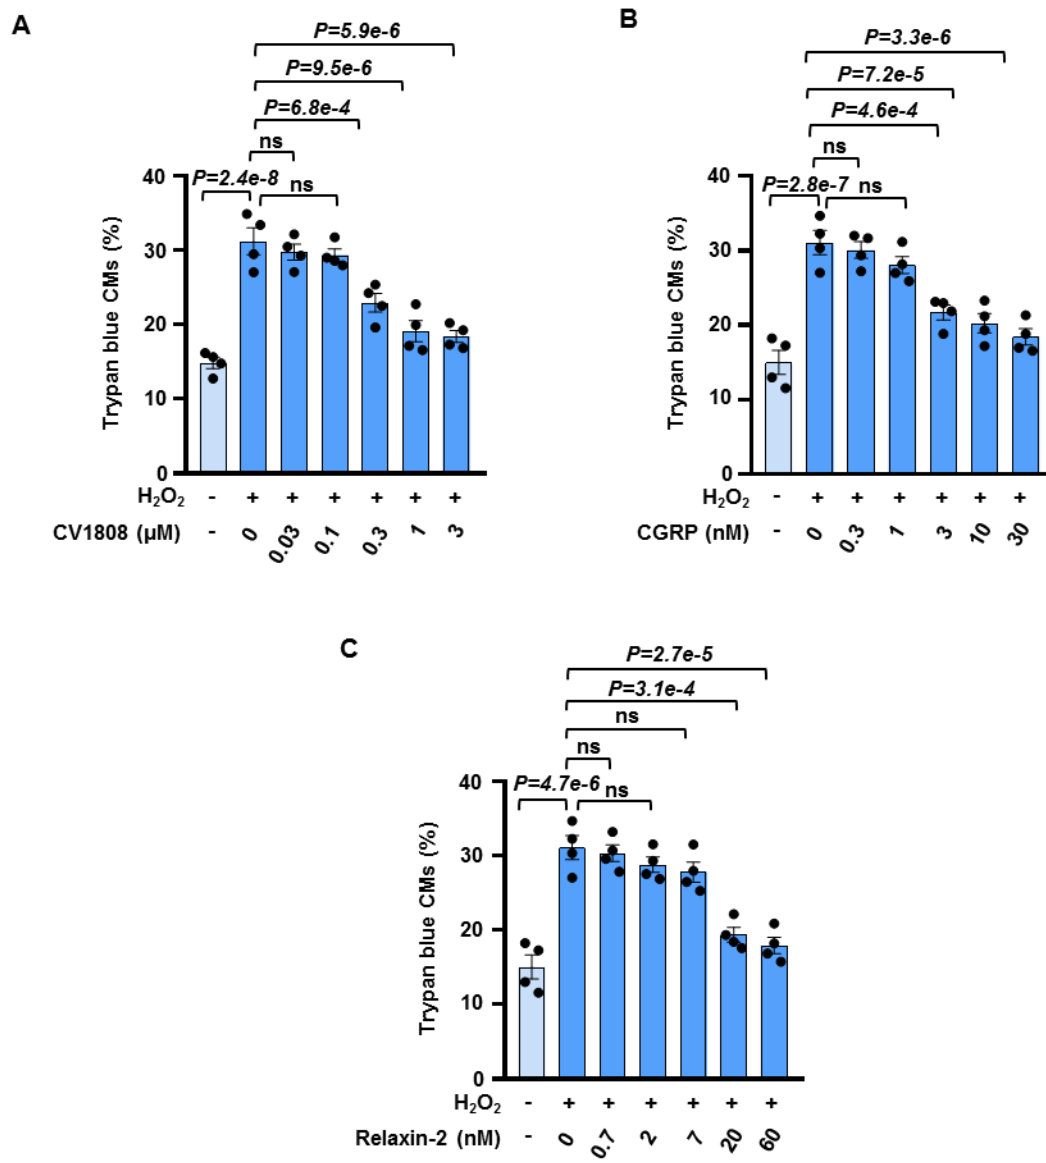

1685 **Figure S17. The dose-response studies of the A2AR, CGRPR, or RXFP1 agonist on CM**  
1686 **death induced by H<sub>2</sub>O<sub>2</sub>.**  
1687 **A**, Quantitative result of trypan blue exclusion assay showing that A2AR agonist CV1808  
1688 protected against CM death induced by H<sub>2</sub>O<sub>2</sub> (5 μM for 24 h) in a dose-dependent manner, n=4.  
1689 **B**, Quantitative result of trypan blue exclusion assay showing that CGRPR agonist CGRP  
1690 protected against H<sub>2</sub>O<sub>2</sub>-induced CM death in a dose-dependent manner, n=4. **C**, Quantitative  
1691 result of trypan blue exclusion assay showing that RXFP1 agonist relaxin-2 protected against  
1692 H<sub>2</sub>O<sub>2</sub>-induced CM death in a dose-dependent manner, n=4. Data were presented as mean ± SEM.  
1693 Data in **Figures S17A-S17C** were analyzed by the Kruskal-Wallis test followed by Conover-Iman  
1694 post-hoc test with Bonferroni corrections for 6 comparisons. All reported P-values have been  
1695 adjusted for a predetermined number of multiple comparisons, as specified in the corresponding  
1696 figures. P <0.05 was statistically significant. ns: no significant difference.

1697  
1698  
1699  
1700  
1701  
1702  
1703  
1704  
1705  
1706  
1707  
1708  
1709  
1710  
1711  
1712  
1713  
1714  
1715  
1716  
1717  
1718  
1719  
1720  
1721  
1722  
1723  
1724  
1725  
1726  
1727  
1728  
1729  
1730  
1731  
1732  
1733  
1734  
1735  
1736  
1737  
1738  
1739  
1740  
1741  
1742  
1743  
1744  
1745  
1746

Figure S18

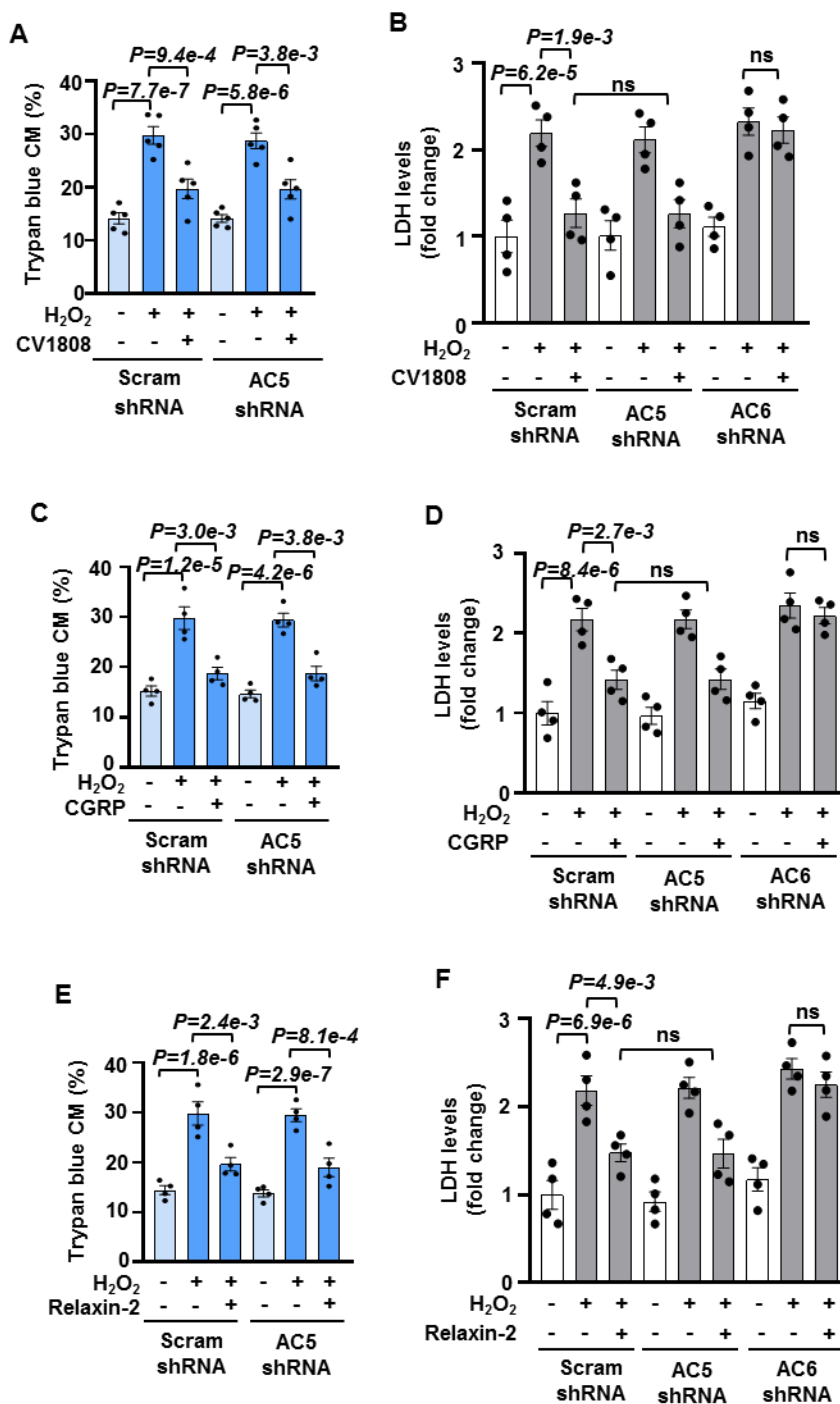

1747 **Figure S18. The role of AC5 or AC6 in the protective effect of A2R, CGRPR, or RXFP1**  
1748 **against CM death.**

1749 **A, C and E**, Quantified results of trypan blue exclusion assay showing that AC5 shRNA did not  
1750 alter the protective effect of A2R agonist CV1808 (1  $\mu$ M), CGRPR agonist CGRP (10 nM) or  
1751 RXFP1 agonist relaxin-2 (20 nM) against CM death induced by H<sub>2</sub>O<sub>2</sub> (5  $\mu$ M for 24 h), n=5 for **A**,  
1752 4 for **C** and **E**. **B, D and F**, Results of LDH leakage showing that AC6 shRNA, but not AC5 shRNA,  
1753 abolished the protective effect of CV1808, CGRP, or relaxin-2 against CM death, n=4. Data were  
1754 mean  $\pm$  SEM. Data in **Figures S18A-S18F** were analyzed by the Kruskal-Wallis test followed by  
1755 Conover-Iman post-hoc test with Bonferroni corrections for 4 comparisons. All reported P-values  
1756 have been adjusted for a predetermined number of multiple comparisons, as specified in the  
1757 corresponding figures. P <0.05 was statistically significant. ns: no significant difference.  
1758  
1759

1760

1761

1762

1763

1764

1765

1766

1767

1768

1769

1770

1771

1772

1773



1774

# Figure S19

1775

1776

1777

1778

1779

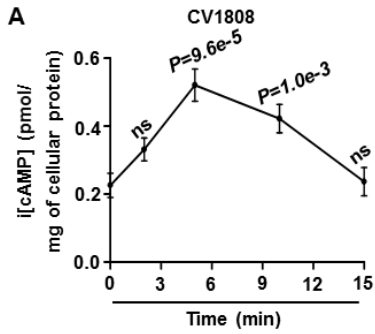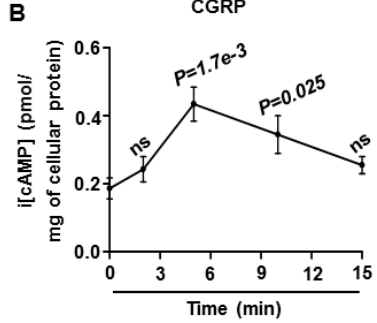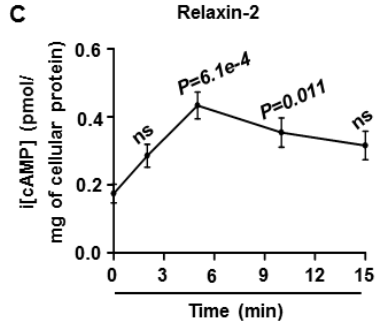

1780

1781

1782

1783

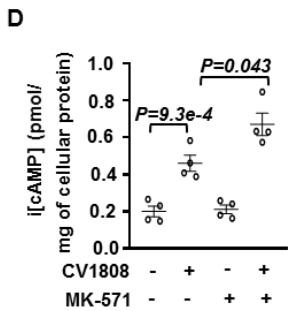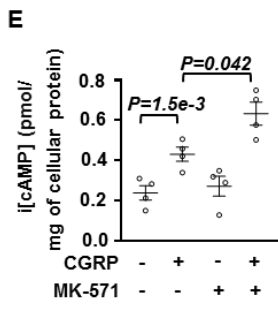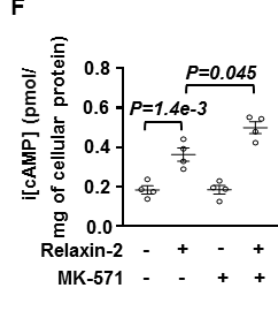

1784

1785

1786

1787

1788

1789

1790

1791

1792

1793

1794

1795

1796

1797

1798

1799

1800

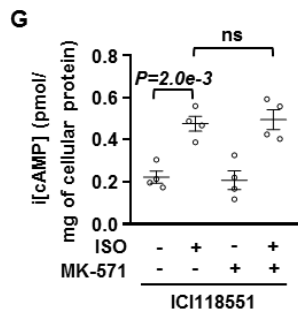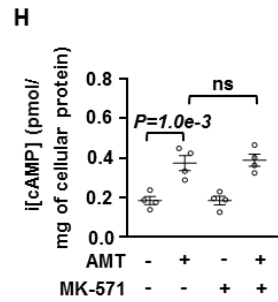

1801 **Figure S19. Time course of A2R-, CGRPR- or RXFP1-induced i[cAMP] in CMs; the role of**  
1802 **MRP in various GsPCR-induced i[cAMP].**

1803 **A-C**, Time course of i[cAMP] levels induced by A2R agonist CV1808 (1  $\mu$ M), CGRPR agonist  
1804 CGRP (10 nM), or RXFP1 agonist relaxin-2 (20 nM) as indicated. CV1808-, CGRP- or relaxin-2-  
1805 induced i[cAMP] peaked at 5 min, n=4. The statistics were performed by comparing to the 0-min  
1806 time point. **D-F**, Results of i[cAMP] levels showing that pan MRP blocker MK-571 (10  $\mu$ M)  
1807 enhanced CV1808-, CGRP- or relaxin-2- induced elevation of i[cAMP]. It implicates that CV1808-,  
1808 CGRP- or relaxin-2-induced i[cAMP] could efflux via MRPs, n=4. **G** and **H**, Results of i[cAMP]  
1809 levels showing that MK-571 had no significant effect on elevation of i[cAMP] induced by  $\beta$ AR  
1810 agonist ISO (10  $\mu$ M for 5 min) or H2R agonist AMT (10  $\mu$ M for 5 min). It implies that ISO- or AMT-  
1811 induced i[cAMP] could not efflux via MRPs, n=4. Data were mean  $\pm$  SEM. Data in **Figures S19A-**  
1812 **S19C** were analyzed by the Kruskal-Wallis test followed by Conover-Iman post-hoc test with  
1813 Bonferroni corrections for 4 comparisons, and **Figures S19D-S19H** by the two-way ART ANOVA  
1814 with Bonferroni post-hoc test corrections for 2 comparisons. All reported P-values have been  
1815 adjusted for a predetermined number of multiple comparisons, as specified in the corresponding  
1816 figures. P <0.05 was statistically significant. ns: no significant difference.

1817  
1818

1819

1820

1821

1822

1823

1824

1825

1826

1827

1828

1829

1830

1831  
1832  
1833  
1834  
1835  
1836  
1837  
1838  
1839  
1840  
1841  
1842  
1843  
1844  
1845  
1846  
1847  
1848  
1849  
1850  
1851  
1852  
1853  
1854  
1855  
1856  
1857  
1858  
1859  
1860  
1861  
1862  
1863  
1864  
1865  
1866  
1867  
1868  
1869  
1870  
1871  
1872  
1873  
1874  
1875  
1876  
1877  
1878  
1879  
1880

Figure S20

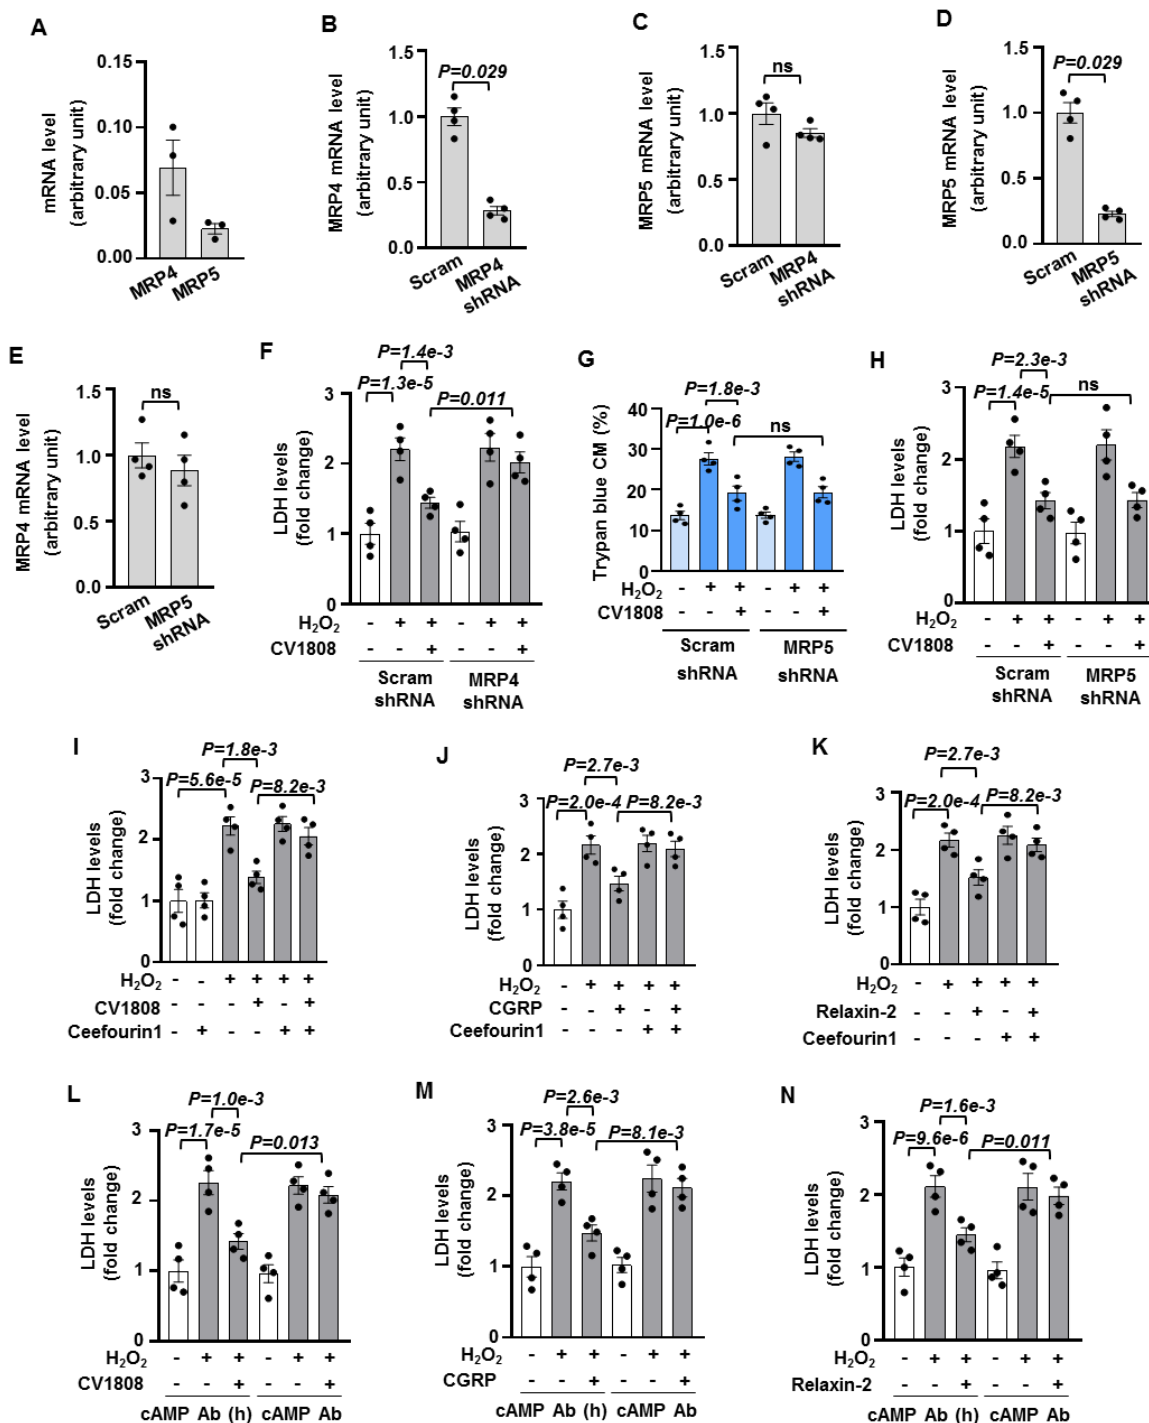

1881 **Figure S20. The role of MRP-induced e[cAMP] in the protective effect of A2R, CGRPR, and**  
1882 **RXFP1 against CM death using MRP4 or MRP5 shRNA, MRP4 inhibitor or cAMP antibody.**  
1883 **A**, RT-qPCR results showing relative mRNA levels of MRP4 and MRP5 in adult mouse CMs, n=3.  
1884 Data were normalized by the housekeeping gene GAPDH. **B** and **C**, RT-qPCR results showing  
1885 mRNA levels of MRP4 or MRP5 in CMs treated with MRP4 shRNA via lentivirus. MRP4 shRNA  
1886 largely reduced MRP4 expression but did not significantly affect MRP5 expression. These results  
1887 demonstrated the efficiency and specificity of MRP4 gene knocking down (KD) , n=4. Data were  
1888 normalized by the housekeeping gene GAPDH. The result was presented as the fold change of  
1889 the control group average. **D** and **E**, RT-qPCR results showing mRNA levels of MRP4 or MRP5  
1890 in CMs treated with MRP5 shRNA via lentivirus. MRP5 shRNA largely reduced MRP5 expression  
1891 but did not significantly affect MRP4 expression. These results demonstrated the efficiency and  
1892 specificity of MRP5 KD, n=4. Data were normalized by the housekeeping gene GAPDH. The  
1893 result was presented as the fold change of the control group average. **F**, Results of LDH leakage  
1894 showing that MRP4 shRNA abolished the protective effect of A2R agonist CV1808 (1  $\mu$ M) against  
1895 CM death induced by H<sub>2</sub>O<sub>2</sub> (5  $\mu$ M for 24 h), n=4. **G** and **H**, Results of trypan blue exclusion assay  
1896 and LDH leakage showing that MRP5 shRNA did not significantly affect the protective effect of  
1897 CV1808, n=4. **I-K**, Results of LDH leakage showing that MRP4 inhibitor ceefourin1 (20  $\mu$ M)  
1898 abolished the effect of CV1808, CGRPR agonist CGRP (10 nM), or RXFP1 agonist relaxin-2 (20  
1899 nM) on CM viability, n=4. **L-N**, Results of LDH leakage showing that the cAMP antibody (0.25  
1900  $\mu$ g/mL), but not the heat-inactivated one, blocked the effect of CV1808, CGRP, or relaxin-2 on  
1901 CM viability, n=4. Data were mean  $\pm$  SEM. Data in **Figures S20F-S20N** were analyzed by the  
1902 Kruskal-Wallis test followed by Conover-Iman post-hoc test with Bonferroni corrections for 3  
1903 comparisons, and **Figures S20B-S20E** by the Mann-Whitney test. All reported P-values have  
1904 been adjusted for a predetermined number of multiple comparisons, as specified in the  
1905 corresponding figures, except in **Figures S20B-S20E**, where raw P-values are reported. P <0.05  
1906 was statistically significant. ns: no significant difference.

1908

1909

1910

1911

1912

1913

1914

1915

1916

1917  
1918  
1919  
1920  
1921  
1922  
1923  
1924  
1925  
1926  
1927  
1928  
1929  
1930  
1931  
1932  
1933  
1934  
1935  
1936  
1937  
1938  
1939  
1940  
1941  
1942  
1943  
1944  
1945  
1946  
1947  
1948  
1949  
1950  
1951  
1952  
1953  
1954  
1955  
1956  
1957  
1958  
1959

# Figure S21

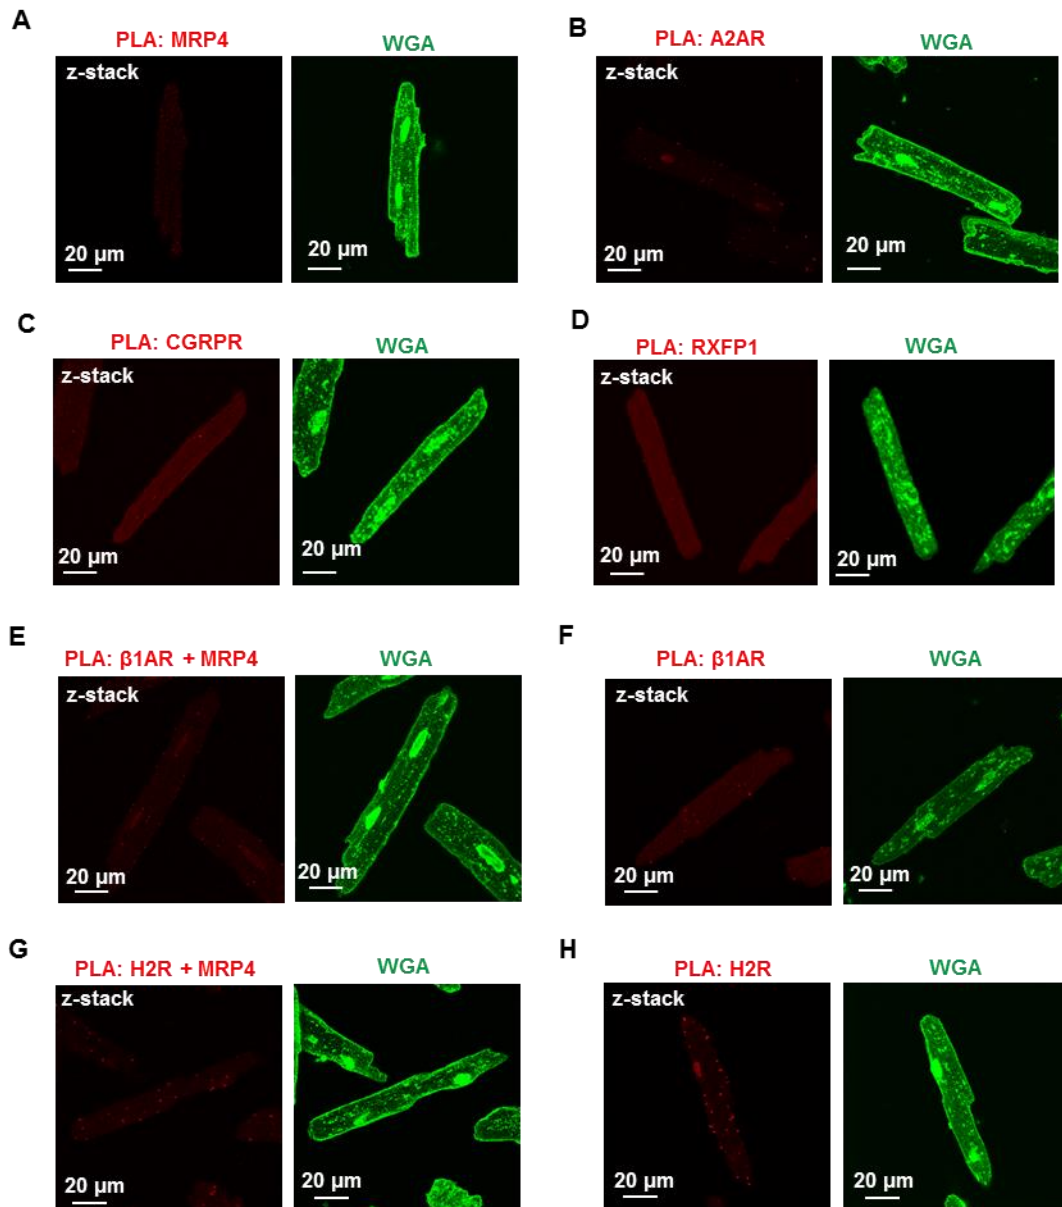

1960  
1961  
1962

1963 **Figure S21. PLA negative controls for MRP4, A2AR, CGRPR, RXFP1,  $\beta$ 1AR or H2R in**  
1964 **CMs; PLA of MRP4 with  $\beta$ 1AR or H2R in CMs.**

1965 **A-D**, PLA results showing negative controls performed with MRP4, A2AR, CGRPR, or RXFP1  
1966 antibody alone in CMs. WGA images showing CMs in the corresponding fields. There was no  
1967 significant PLA signal detected in negative controls. **E** and **G**, Images of PLA performed by MRP4  
1968 plus  $\beta$ 1AR or H2R antibodies together in CMs. WGA images showing CMs in the corresponding  
1969 fields. No significant PLA positive signals were detected between MRP4 and  $\beta$ 1AR or H2R,  
1970 indicating no apparent interaction between MRP4 and  $\beta$ 1AR or H2R detected. **F** and **H**, PLA  
1971 results showing negative controls performed with  $\beta$ 1AR or H2R antibody alone in CMs. WGA  
1972 images showing CMs in the corresponding fields. There was no significant PLA signal detected  
1973 in negative controls.

1974  
1975

1976

1977

1978

1979

1980

1981

1982

1983

1984

1985

1986

1987

1988

1989

1990  
1991  
1992  
1993  
1994  
1995  
1996  
1997  
1998  
1999  
2000  
2001  
2002  
2003  
2004  
2005  
2006  
2007  
2008  
2009  
2010  
2011  
2012  
2013  
2014  
2015  
2016  
2017  
2018  
2019  
2020  
2021  
2022  
2023  
2024  
2025  
2026  
2027  
2028  
2029  
2030  
2031  
2032  
2033  
2034  
2035  
2036  
2037  
2038  
2039  
2040

**Figure S22**

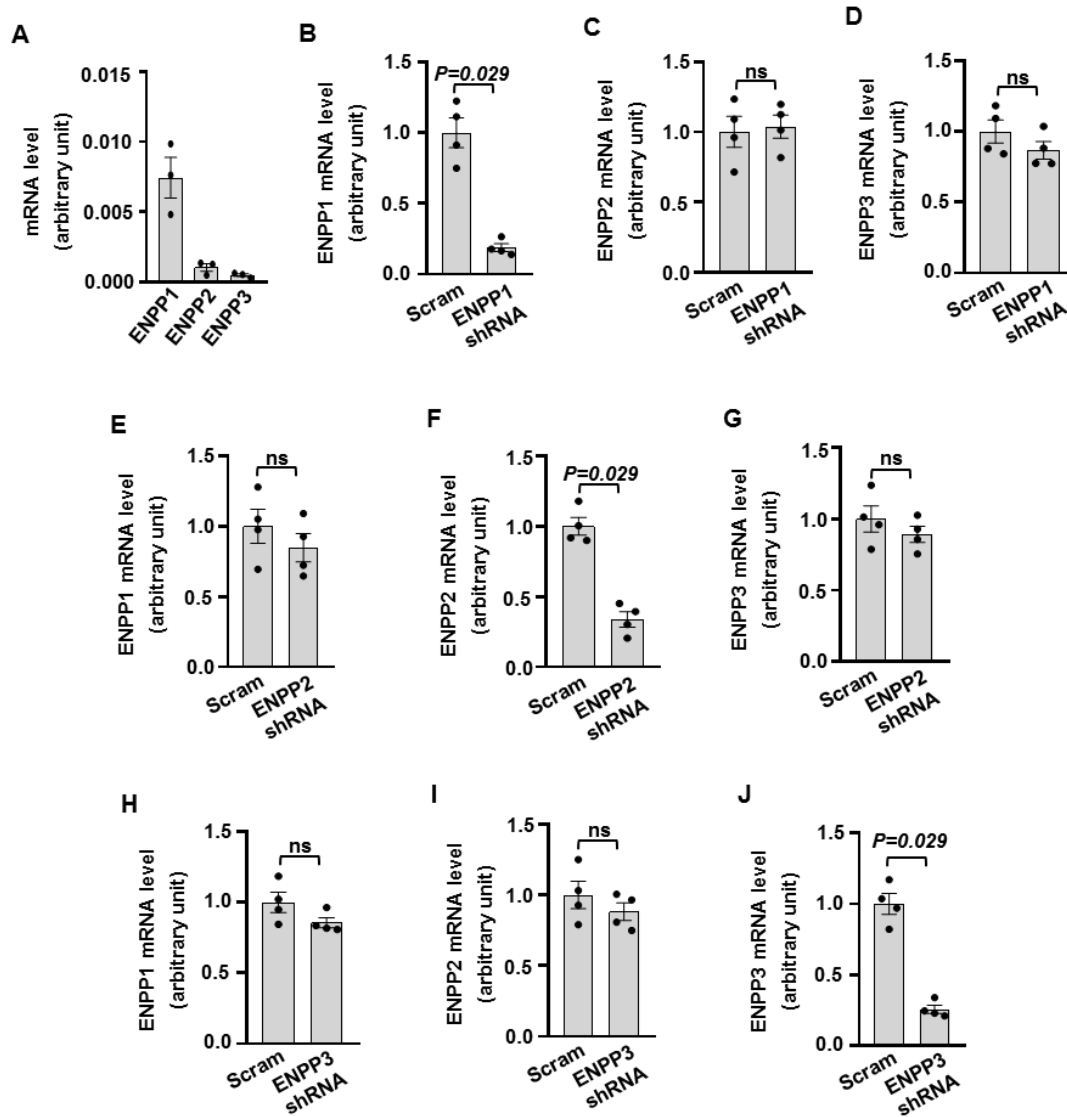

2041 **Figure S22. ENPP1, ENPP2, or ENPP3 shRNA efficiency and specificity.**  
2042 **A**, RT-qPCR results showing relative mRNA expression levels of ENPP1, 2, and 3 in adult mouse  
2043 CMs, n=3. Data were normalized by the housekeeping gene GAPDH. **B-D**, RT-qPCR results  
2044 showing ENPP1, ENPP2, or ENPP3 mRNA in CMs treated with ENPP1 shRNA via lentivirus.  
2045 ENPP1 shRNA largely reduced ENPP1 expression but had no significant effect on ENPP2 or  
2046 ENPP3 expression. These results demonstrated the efficiency and specificity of ENPP1 gene KD,  
2047 n=4. **E-G**, RT-qPCR results showing ENPP1, ENPP2, or ENPP3 mRNA in CMs treated with  
2048 ENPP2 shRNA via lentivirus. ENPP2 shRNA largely reduced ENPP2 expression but did not  
2049 significantly affect ENPP1 or ENPP3 expression. These results demonstrated the efficiency and  
2050 specificity of ENPP2 gene KD, n=4. **H-J**, RT-qPCR results showing mRNA levels of ENPP1,  
2051 ENPP2, or ENPP3 in CMs treated with ENPP3 shRNA via lentivirus. ENPP3 shRNA largely  
2052 reduced ENPP3 expression but did not significantly affect ENPP1 or ENPP2 expression. These  
2053 results demonstrated the efficiency and specificity of ENPP3 gene KD, n=4. Data for quantification  
2054 gene expression were normalized by the housekeeping gene GAPDH. The result was presented  
2055 as the fold change of the control group average. Data were mean  $\pm$  SEM. Data in **Figures S22B-**  
2056 **S22J** were analyzed by the Mann-Whitney test. All raw P-values are reported. P <0.05 was  
2057 statistically significant. ns: no significant difference.  
2058

2059

2060

2061

2062

2063

2064

2065

2066

2067

2068

2069

2070



Figure S23

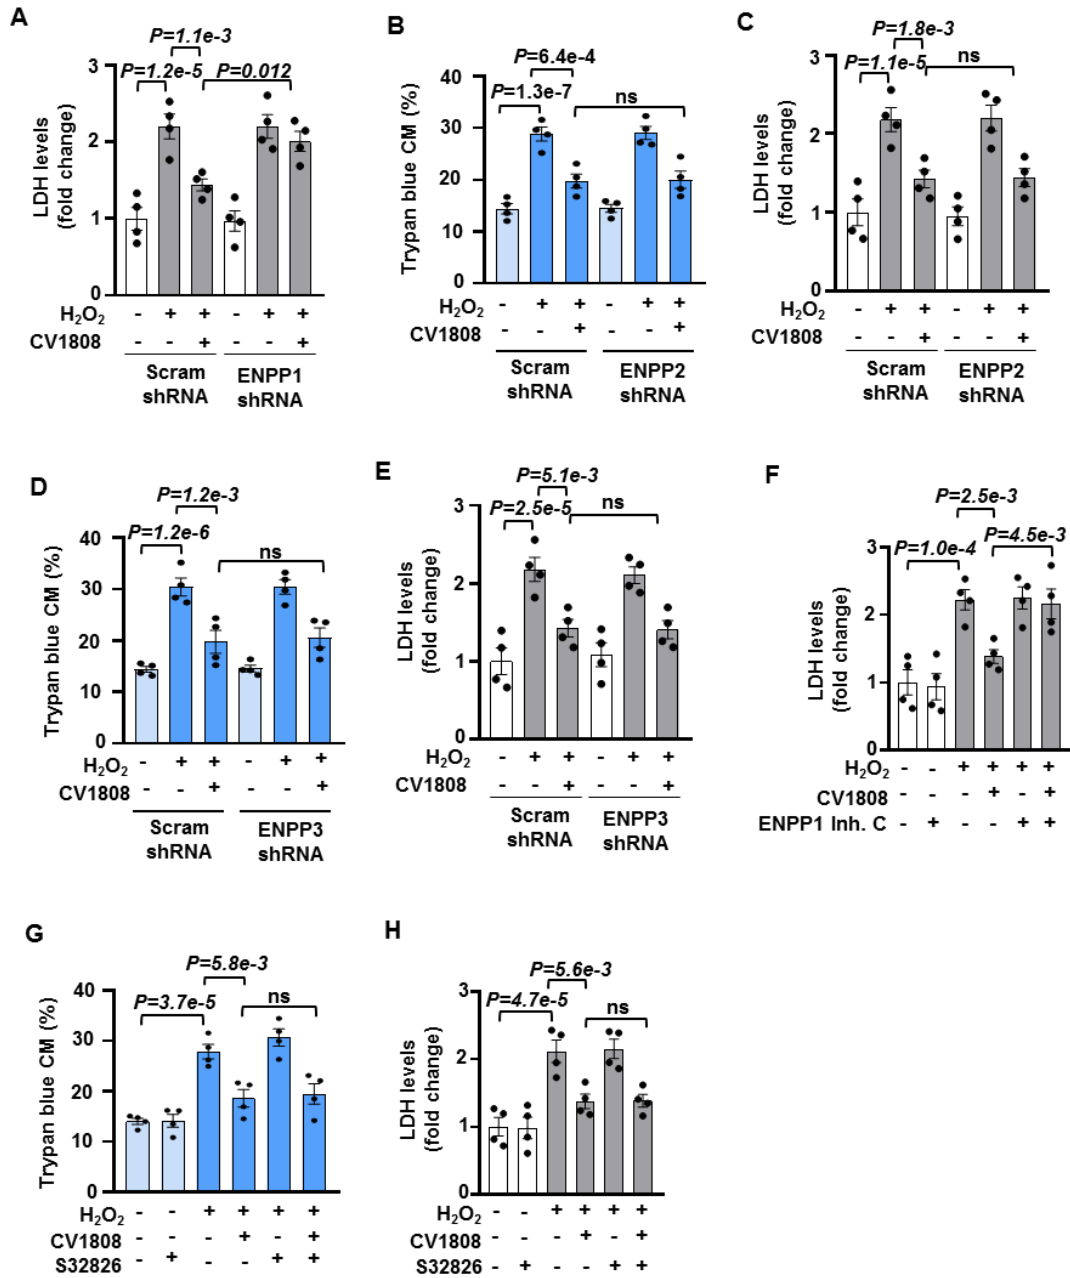

2122 **Figure S23. The role of ENPP1, 2, or 3 in the protective effect of A2R against CM death.**  
2123 **A**, Results of LDH leakage showing that ENNP1 shRNA significantly abolished the effect of A2R  
2124 agonist CV1808 (1  $\mu$ M) on LDH leakage induced by H<sub>2</sub>O<sub>2</sub> (5  $\mu$ M for 24 h), n=4. **B** and **C**, Results  
2125 of trypan blue exclusion assay and LDH leakage showing that ENNP2 shRNA did not alter the  
2126 protective effect of CV1808 against H<sub>2</sub>O<sub>2</sub>-induced CM death and LDH leakage, n=4. **D** and **E**,  
2127 Results of trypan blue exclusion assay and LDH leakage showing that ENNP3 shRNA did not  
2128 alter the effect of CV1808 on CM viability, n=4. **F**, Results of LDH leakage showing that ENPP1  
2129 inhibitor (ENPP1 inhibitor C, 10  $\mu$ M) significantly abolished the protective effect of CV1808 against  
2130 H<sub>2</sub>O<sub>2</sub>-induced LDH leakage, n=4. **G** and **H**, Results of trypan blue exclusion assay and LDH  
2131 leakage show that ENPP2 inhibitor S32826 (10  $\mu$ M) did not significantly affect the protective effect  
2132 of CV1808 against H<sub>2</sub>O<sub>2</sub>-induced CM death and LDH leakage, n=4. Data were mean  $\pm$  SEM. Data  
2133 in **Figures S23A-S23H** were analyzed by the Kruskal-Wallis test followed by Conover-Iman post-  
2134 hoc test with Bonferroni corrections for 3 comparisons. All reported P-values have been adjusted  
2135 for a predetermined number of multiple comparisons, as specified in the corresponding figures. P  
2136 <0.05 was statistically significant. ns: no significant difference.  
2137

2138

2139

2140

2141

2142

2143

2144

2145

2146

2147

2148

2149

2150

2151  
2152  
2153  
2154  
2155  
2156  
2157  
2158  
2159  
2160  
2161  
2162  
2163  
2164  
2165  
2166  
2167  
2168  
2169  
2170  
2171  
2172  
2173  
2174  
2175  
2176  
2177  
2178  
2179  
2180  
2181  
2182  
2183  
2184  
2185  
2186  
2187  
2188  
2189  
2190  
2191  
2192  
2193  
  
2194  
  
2195  
  
2196

## Figure S24

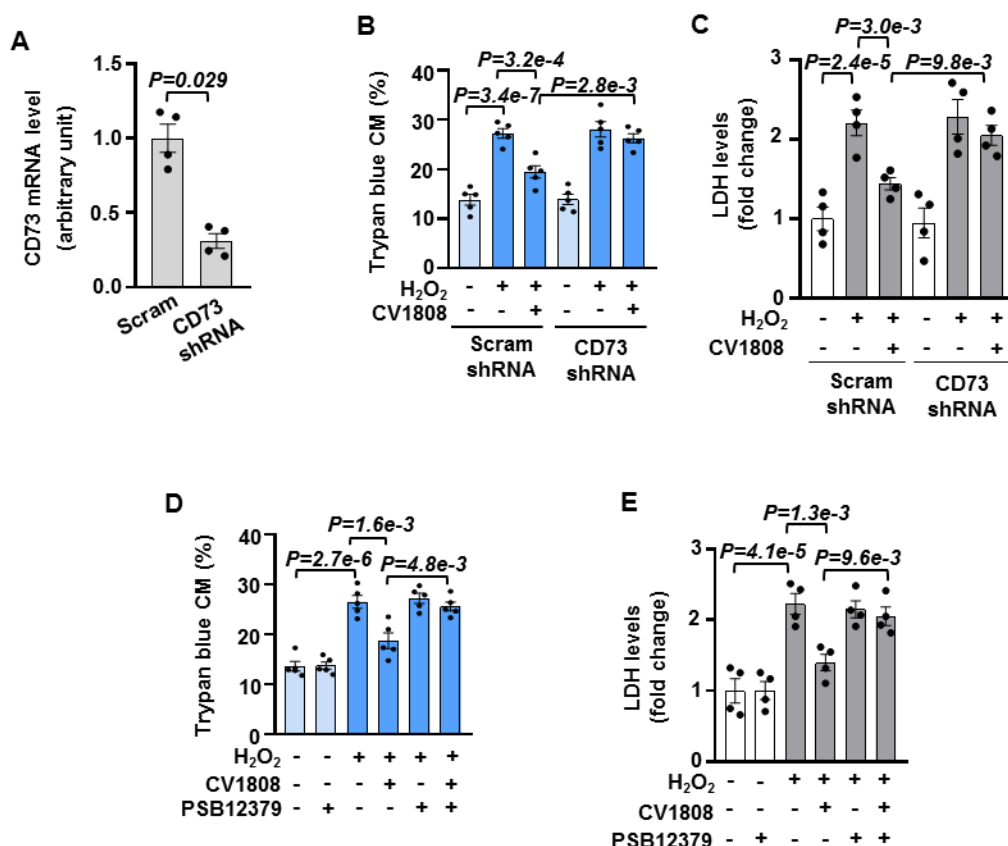

### Figure S24. The role of CD73 in the protective effect of A2R against CM death.

**A**, RT-qPCR results showing mRNA levels of CD73 in CMs treated with CD73 shRNA via lentivirus. CD73 shRNA largely reduced CD73 expression,  $n=4$ . Data were normalized by house keeping gene GAPDH. The result was presented as the fold change of the control group average. **B-E**, Results of trypan blue exclusion assay and LDH leakage showing that CD73 shRNA or CD73 inhibitor PSB12379 (10  $\mu$ M) abolished the protective effect of CV1808 on CM survival,  $n=5$  for **B** and **D**, 4 for **C** and **E**. Data were mean  $\pm$  SEM. Data in **Figures S24B-S24E** were analyzed by the Kruskal-Wallis test followed by Conover-Iman post-hoc test with Bonferroni corrections for 3 comparisons, and **Figure S24A** by the Mann-Whitney test. All reported P-values have been adjusted for a predetermined number of multiple comparisons, as specified in the corresponding figures, except in **Figure S24A** where raw P-value is reported.  $P < 0.05$  was statistically significant.

2197  
2198  
2199  
2200  
2201  
2202  
2203  
2204  
2205  
2206  
2207  
2208  
2209  
2210  
2211  
2212  
2213  
2214  
2215  
2216  
2217  
2218  
2219  
2220  
2221  
2222  
2223  
2224  
2225  
2226  
2227  
2228  
2229  
2230  
2231  
2232  
2233  
2234  
2235  
2236  
2237  
2238  
2239  
2240  
2241  
2242  
2243  
2244  
2245  
2246

# Figure S25

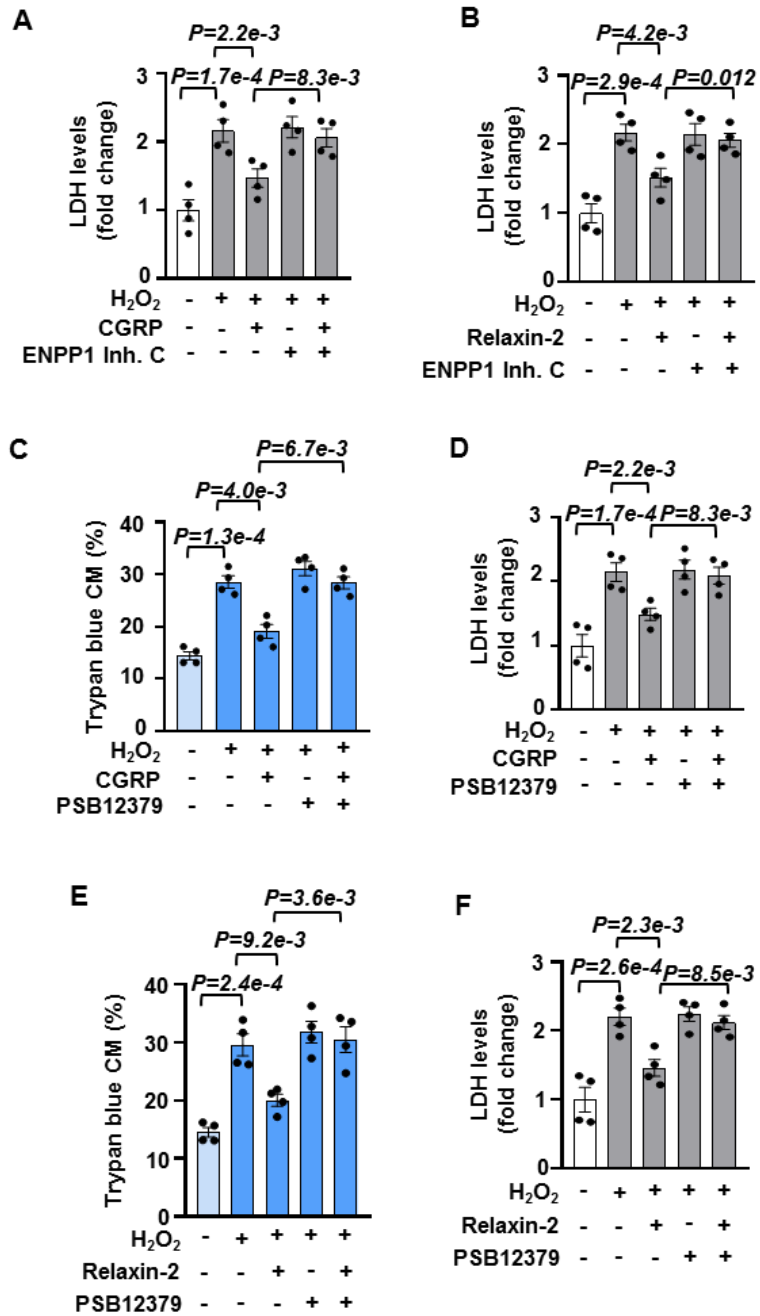

2247 **Figure S25. The role of ENPP1 and CD73 in the protective effect of CGRPR or RXFP1**  
2248 **against CM death.**

2249 **A** and **B**, Results of LDH leakage showing that ENPP1 inhibitor (ENPP1 inhibitor C, 10  $\mu$ M)  
2250 significantly abolished the protective effect of CGRPR agonist CGRP (10 nM) or RXFP1 agonist  
2251 relaxin-2 (20 nM) against CM death induced by H<sub>2</sub>O<sub>2</sub> (10  $\mu$ M for 24 h), n=4. **C-F**, Results of trypan  
2252 blue exclusion assay and LDH leakage showing that CD37 inhibitor PSB12379 (10  $\mu$ M) inhibited  
2253 the protective effect of CGRP or relaxin-2 on CM survival, n=4. Data were mean  $\pm$  SEM. Data in  
2254 **Figures S25A-S25F** were analyzed by the Kruskal-Wallis test followed by Conover-Iman post-  
2255 hoc test with Bonferroni corrections for 3 comparisons. All reported P-values have been adjusted  
2256 for a predetermined number of multiple comparisons, as specified in the corresponding figures. P  
2257 <0.05 was statistically significant. ns: no significant difference.  
2258

2259

2260

2261

2262

2263

2264

2265

2266

2267

2268

2269

2270

2271

2272

2273  
2274  
2275  
2276  
2277  
2278  
2279  
2280  
2281  
2282  
2283  
2284  
2285  
2286  
2287  
2288  
2289  
2290  
2291  
2292  
2293  
2294  
2295  
2296  
2297  
2298  
2299  
2300  
2301  
2302  
2303  
2304  
2305  
2306  
2307  
2308  
2309  
2310  
2311  
2312  
2313  
2314  
2315  
2316  
2317  
2318  
2319  
2320  
2321  
2322

Figure S26

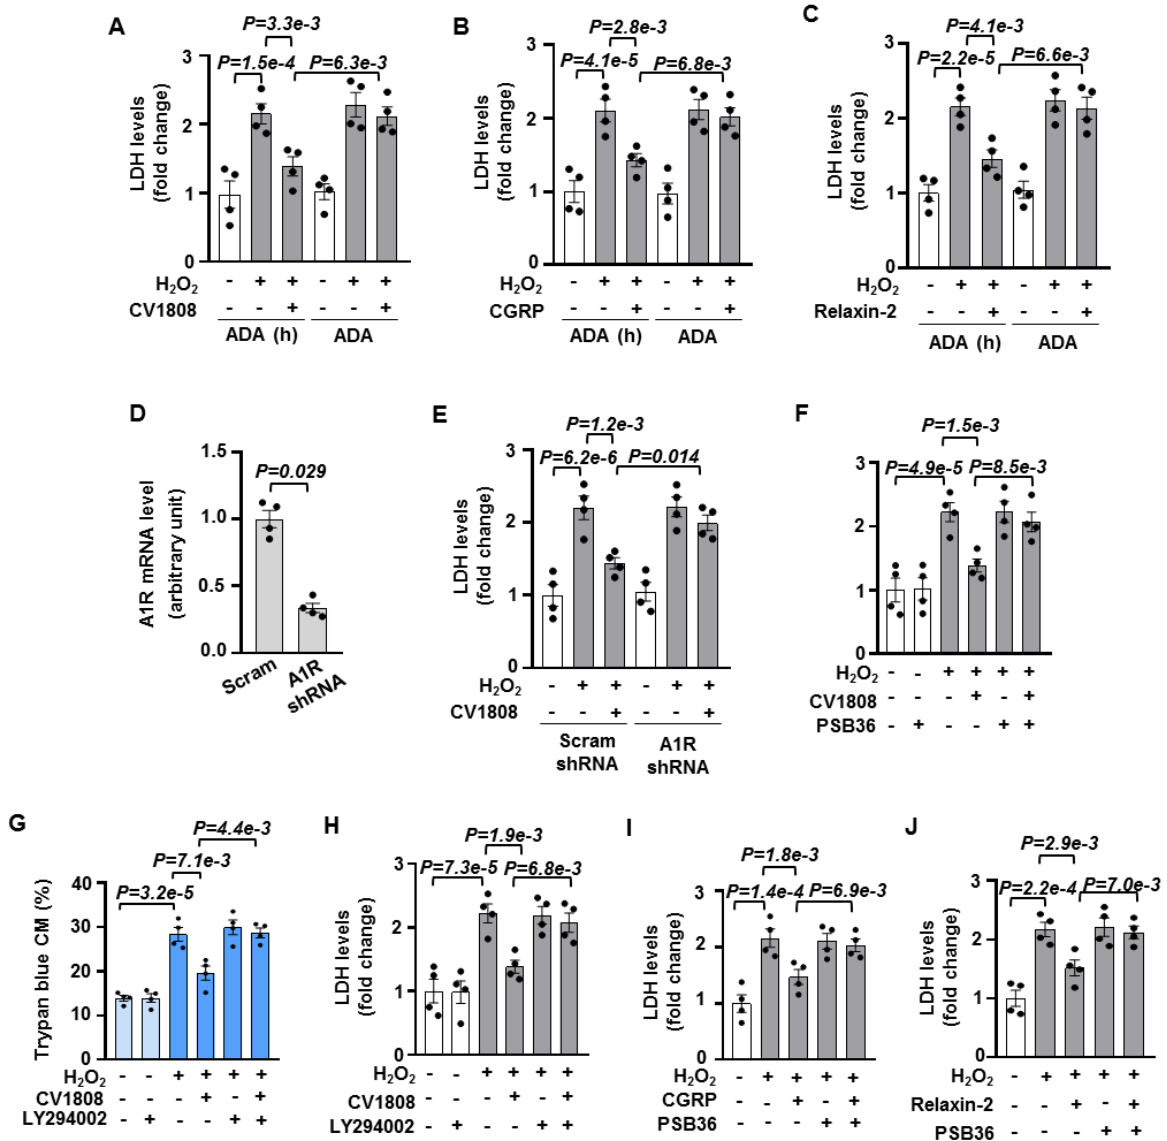

2323 **Figure S26. The role of e[ADO], A1R, or PI3K in the protective effect of pro-survival GsPCRs**  
2324 **against CM death.**

2325 **A-C**, Results of LDH leakage showing that depleting e[ADO] with active ADA (1.2 U/mL)  
2326 significantly inhibited the protective effect of A2R agonist CV1808 (1  $\mu$ M), CGRPR agonist CGRP  
2327 (10 nM) or RXFP1 agonist (20 nM) against LDH leakage induced by H<sub>2</sub>O<sub>2</sub> (5  $\mu$ M for 24 h). The  
2328 heat-inactivated ADA was used as a negative control, n=4. **D**, RT-qPCR results showing mRNA  
2329 levels of A1R in CMs treated with A1R shRNA via lentivirus. A1R shRNA largely reduced A1R  
2330 expression, n=4. Data were normalized by the housekeeping gene GAPDH. The result was  
2331 presented as the fold change of the control group average. **E** and **F**, Results of LDH leakage  
2332 showing that A1R shRNA or A1R antagonist PSB36 (10 nM) significantly abolished the protective  
2333 effect of CV1808 on CM survival, n=4. **G** and **H**, Results of trypan blue exclusion assay and LDH  
2334 leakage showing that PI3K inhibitor LY284002 (10  $\mu$ M) significantly abolished the protective effect  
2335 of CV1808 against H<sub>2</sub>O<sub>2</sub>-induced CM death and LDH leakage, n=4. **I** and **J**, Results of LDH  
2336 leakage showing that PSB36 abolished the protective effect of CGRP or relaxin-2 on CM survival,  
2337 n=4. Data were mean  $\pm$  SEM. Data in **Figures S26A-S26C** and **S26E-S26J** were analyzed by  
2338 the Kruskal-Wallis test followed by Conover-Iman post-hoc test with Bonferroni corrections for 3  
2339 comparisons, and **Figure S26D** by the Mann-Whitney test. All reported P-values have been  
2340 adjusted for a predetermined number of multiple comparisons, as specified in the corresponding  
2341 figures, except in **Figure S26D** where raw P-value is reported. P <0.05 was statistically significant.  
2342

2343

2344

2345

2346

2347

2348

2349

2350

2351

2352

2353

2354  
2355  
2356  
2357  
2358  
2359  
2360  
2361  
2362  
2363  
2364  
2365  
2366  
2367  
2368  
2369  
2370  
2371  
2372  
2373  
2374  
2375  
2376  
2377  
2378  
2379  
2380  
2381  
2382  
2383  
2384  
2385  
2386  
2387  
2388  
2389  
2390  
2391  
2392  
2393  
2394  
2395  
2396  
2397  
2398  
2399  
2400  
2401  
2402  
2403  
2404

## Figure S27

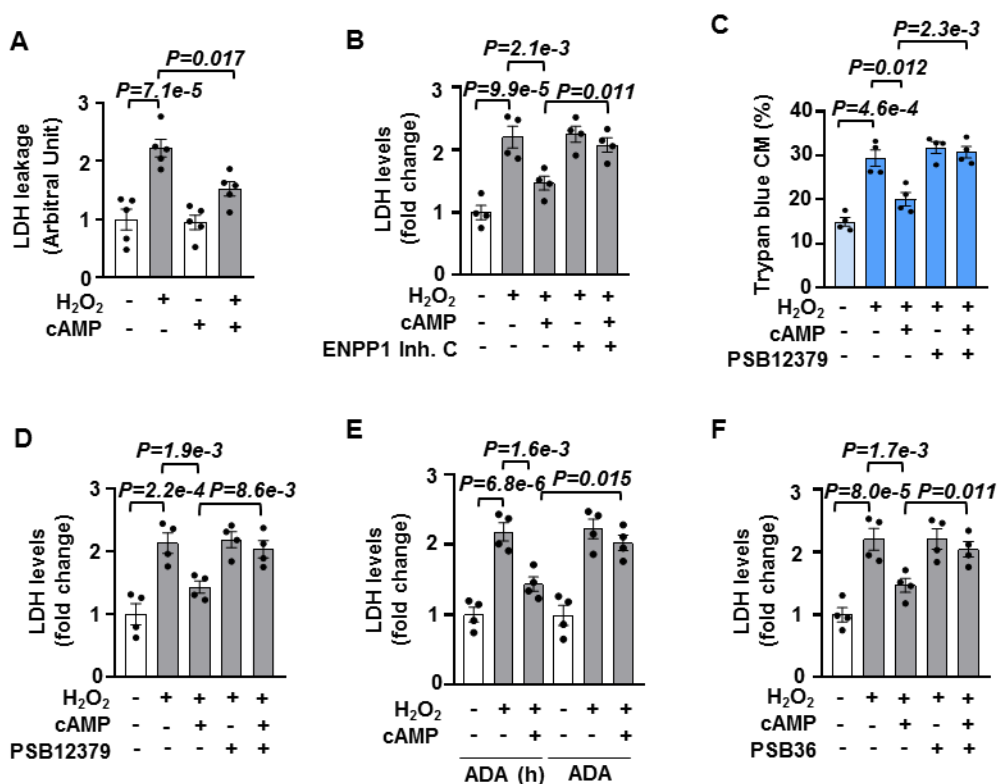

### Figure S27. The role of ENPP1, CD73, e[ADO], and A1R in the protective effect of e[cAMP] on CM survival.

**A**, Results of LDH leakage showing that exogenous membrane impermeable cAMP (cAMP, 10  $\mu$ M) largely inhibited LDH leakage induced by H<sub>2</sub>O<sub>2</sub> (5  $\mu$ M for 24 h), n=5. **B**, Results of LDH leakage showing that ENPP1 inhibitor (ENPP1 inhibitor C, 10  $\mu$ M) significantly abolished the protective effect of cAMP on CM survival, n=4. **C** and **D**, Results of trypan blue exclusion assay and LDH leakage showing that CD73 inhibitor PSB12379 (10  $\mu$ M) significantly abolished the protective effect of cAMP against CM death and LDH leakage induced by H<sub>2</sub>O<sub>2</sub> (5  $\mu$ M for 24 h), n=4. **E**, Result of LDH leakage showing that depleting e[ADO] with active ADA (1.2 U/mL) significantly inhibited the protective effect of cAMP on CM survival. The heat-inactivated ADA was used as a negative control, n=4. **F**, Results of LDH leakage showing that A1R antagonist PSB36 (10 nM) significantly inhibited the protective effect of cAMP on CM survival, n=4. Data were mean  $\pm$  SEM. Data in **Figures S27B-S27F** were analyzed by the Kruskal-Wallis test followed by Conover-Iman post-hoc test with Bonferroni corrections for 3 comparisons, and **Figure S27A** by the two-way ART ANOVA with Bonferroni post-hoc test corrections for 2 comparisons. All reported P-values have been adjusted for a predetermined number of multiple comparisons, as specified in the corresponding figures. P < 0.05 was statistically significant.



## Figure S28

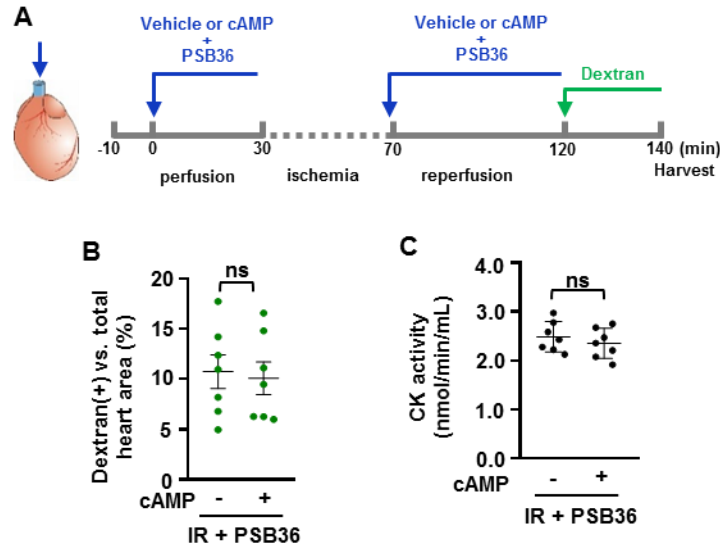

**Figure S28. The role of A1R in the protective effect of exogenous cAMP against myocardial IR injury in *ex vivo* hearts.**

**A**, Diagram of the *ex vivo* experiment design: Isolated mouse hearts were connected to a Langendorff perfusion system and subjected to 30 min equilibration, 40 min global ischemia with no flow, followed by 50 min reperfusion with A1R antagonist PSB36 (20 nM) or PSB36 plus cAMP (20  $\mu$ M). **B**, Quantified results of myocardial FITC-dextran accumulation (an indicator of cardiac injury) showing that PSB36 largely abrogated the protective effect of exogenous membrane impermeable cAMP against IR-induced myocardial injury *ex vivo*,  $n=7$ . **C**, Results of CK activity in coronary outflow showing that PSB36 significantly inhibited the protective effect of cAMP reducing CK activity from mouse hearts with *ex vivo* IR,  $n=7$ . Data were presented as mean  $\pm$  SEM. Data in **Figures S28B** and **S28C** were analyzed by the unpaired t-test. All raw P-values are reported.  $P < 0.05$  was statistically significant. ns: no significant difference.

2446  
2447  
2448  
2449  
2450  
2451  
2452  
2453  
2454  
2455  
2456  
2457  
2458  
2459  
2460  
2461  
2462  
2463  
2464  
2465  
2466  
2467  
2468  
2469  
2470  
2471  
2472  
2473  
2474  
2475  
2476  
2477  
2478  
2479  
2480  
2481  
2482  
2483  
2484  
2485  
2486  
2487  
2488  
2489  
2490  
2491  
2492  
2493  
2494  
2495

## Figure S29

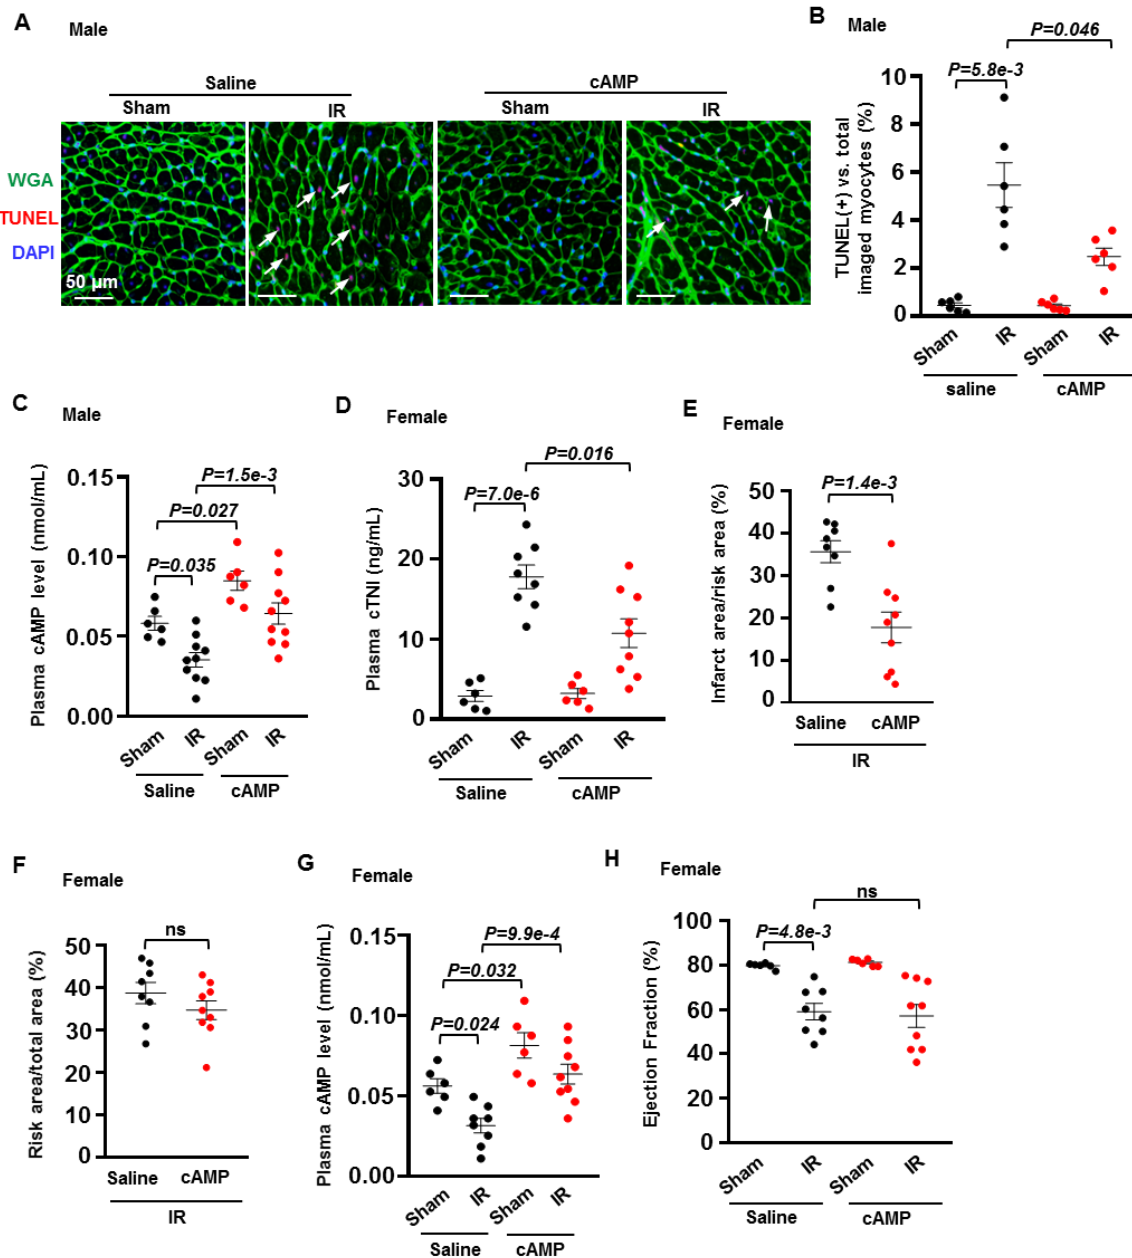

2496 **Figure S29. The effect of exogenous cAMP on *in vivo* cardiac IR injury and plasma cAMP**  
2497 **level in male or female mice**

2498 **A** and **B**, Images and quantified results of TUNEL staining showing that exogenous membrane  
2499 impermeable cAMP significantly reduced IR-induced CM apoptosis in male mouse hearts. White  
2500 arrows indicated apoptotic myocardia with TUNEL-positive nuclei. DAPI indicated nuclei, and  
2501 WGA indicated the myocardium in the corresponding fields of heart sections, n=6. The  
2502 representative images were chosen based on their quality and to most accurately reflect the group  
2503 average across all the available data. **C** and **G**, Results of endpoint plasma cAMP levels in male  
2504 and female mice. IR mice had significantly decreased plasma cAMP levels In control mice without  
2505 cAMP administration compared to sham mice. Exogenous cAMP administration significantly  
2506 increased plasma cAMP levels in both sham and IR mice. After the cAMP treatment, plasma  
2507 cAMP levels of IR mice were almost equivalent to those of normal mice (sham mice without cAMP  
2508 treatment), n=6 (Sham/Vehicle), 10 (IR/Vehicle), 6 (Sham/cAMP), and 10 (IR/cAMP) for male  
2509 mice, n=6 (Sham/Vehicle), 8 (IR/Vehicle), 6 (Sham/cAMP), and 9 (IR/cAMP) for female mice. **D**,  
2510 Results of plasma cTnI levels showing that cAMP significantly inhibited IR-induced plasma cTnI  
2511 increase in female mice, n=6 (Sham/Vehicle), 8 (IR/Vehicle), 6 (Sham/cAMP), and 9 (IR/cAMP).  
2512 **E**, Quantitative results of cardiac TTC staining showing that cAMP significantly reduced IR-  
2513 induced myocardial infarction in female mice, n=8 (IR/Vehicle) and 9 (IR/cAMP). **F**, Results of the  
2514 area at risk in female mouse hearts with IR surgery showed no significant difference between IR  
2515 (saline) and IR (cAMP) groups, which reflects the repeatability and stability of cardiac IR surgery,  
2516 n=8 (IR/Vehicle) and 9 (IR/cAMP). **H**, Results of cardiac ejection fraction assessed by  
2517 echocardiogram showing that exogenous cAMP did not significantly affect IR-induced cardiac  
2518 systolic dysfunction in female mice, n=6 (Sham/Vehicle), 8 (IR/Vehicle), 6 (Sham/cAMP), and 9  
2519 (IR/cAMP). The representative images were chosen based on their quality and to most accurately  
2520 reflect the group average across all the available data. Data were mean  $\pm$  SEM. Data in **Figures**  
2521 **S29C** and **S29G** were analyzed by the one-way ANOVA followed by post-hoc comparisons with  
2522 Bonferroni corrections for 3 comparisons, **Figures S29B, S29D**, and **S29H** by the Welch ANOVA  
2523 with Dunnett T3 post hoc tests for 2 comparisons, **Figures S29E** and **S29F** by the unpaired t-test.  
2524 All reported P-values have been adjusted for a predetermined number of multiple comparisons,  
2525 as specified in the corresponding figures, except in **Figures S29E** and **S29F**, where raw P-values  
2526 are reported. P <0.05 was statistically significant. ns: no significant difference.

2527

2528

2529

2530

2531

2532

2533

2534

2535 **Figure S30**

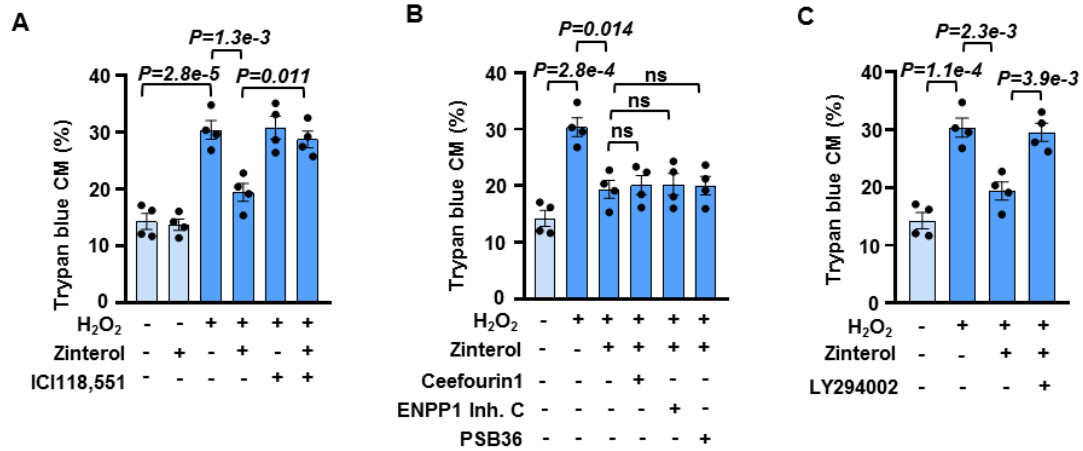

2556 **Figure S30. The role of MRP4, ENPP1, A1R, and PI3K in  $\beta$ 2AR-mediated CM protection.**

2557 **A**, Results of trypan blue exclusion assay showing that  $\beta$ 2AR agonist zinterol (10  $\mu$ M) largely  
 2558 attenuated CM death induced by H<sub>2</sub>O<sub>2</sub> (5  $\mu$ M for 24 h), and  $\beta$ 2AR antagonist ICI118,551 (0.5  $\mu$ M )  
 2559 significantly abolished the protective effect of zinterol against H<sub>2</sub>O<sub>2</sub>-induced CM, n=4. **B**, Results  
 2560 of trypan blue exclusion assay showing that MRP4 inhibitor ceefourin1 (20  $\mu$ M), ENPP1 inhibitor  
 2561 (ENPP1 inhibitor C, 10  $\mu$ M), or A1R antagonist PSB36 (10 nM) had no significant effect on the  
 2562 protective effect of zinterol on CM survival, n=4. **C**, Results of trypan blue exclusion assay  
 2563 showing that PI3K inhibitor LY284002 (10  $\mu$ M) significantly abolished the protective effect of  
 2564 zinterol against H<sub>2</sub>O<sub>2</sub>-induced CM death, n=4. Data were mean  $\pm$  SEM. Data in **Figures S30A**  
 2565 and **S30C** were analyzed by the Kruskal-Wallis test followed by Conover-Iman post-hoc test with  
 2566 Bonferroni corrections for 3 comparisons, and **Figure S30B** by the Kruskal-Wallis test followed  
 2567 by Conover-Iman post-hoc test with Bonferroni corrections for 5 comparisons. All reported P-  
 2568 values have been adjusted for a predetermined number of multiple comparisons, as specified in  
 2569 the corresponding figures. P <0.05 was statistically significant. ns: no significant difference.

2581  
2582  
2583  
2584  
2585  
2586  
2587  
2588  
2589  
2590  
2591  
2592  
2593  
2594  
2595  
2596  
2597  
2598  
2599  
2600  
2601  
2602  
2603  
2604  
2605  
2606  
2607  
2608  
2609  
2610  
2611  
2612  
2613  
2614  
2615  
2616  
2617  
2618  
2619  
2620  
2621  
2622  
2623  
2624  
2625  
2626  
2627  
2628  
2629  
2630

# Figure S31

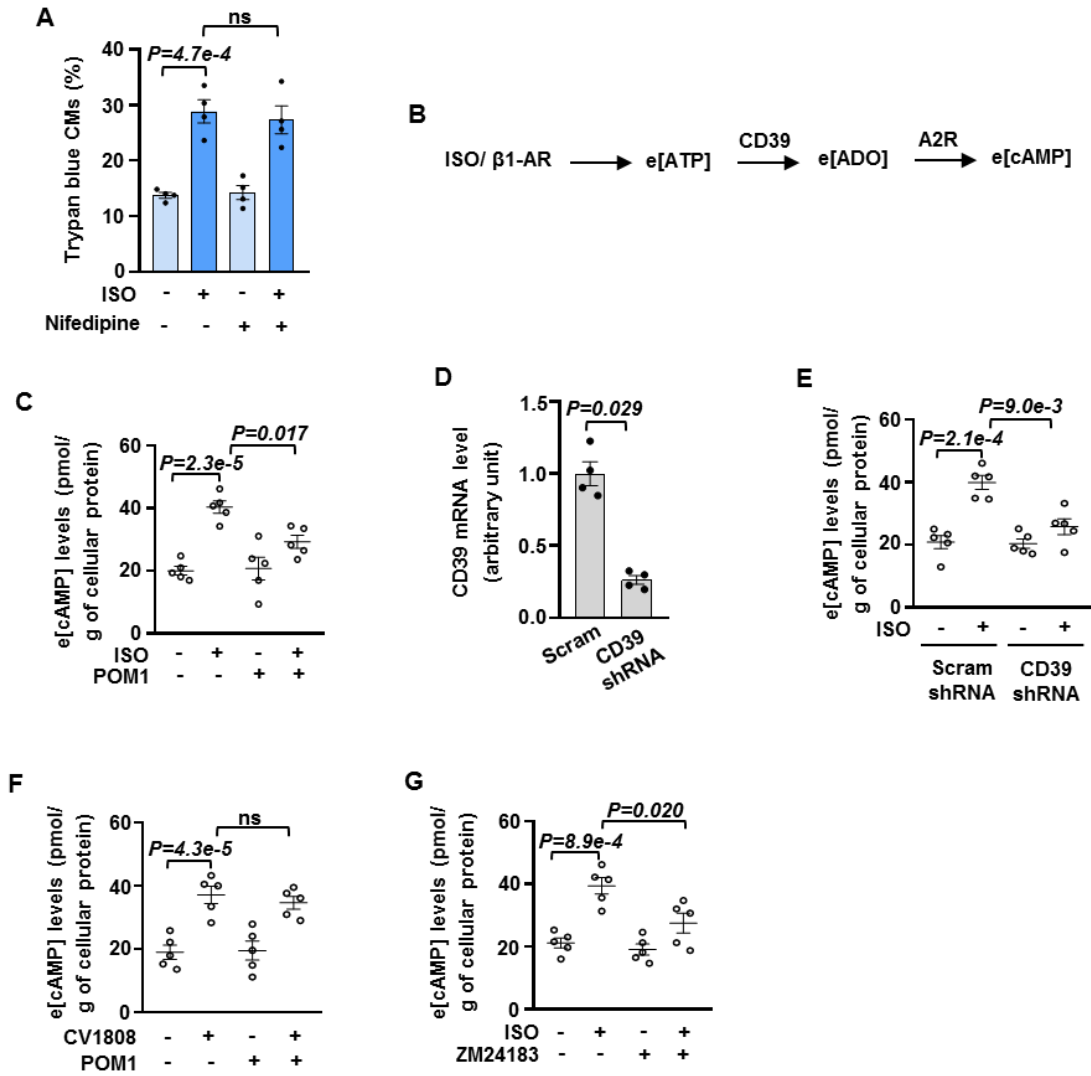

2631 **Figure S31. The role of L-type Ca<sup>2+</sup> Channel in ISO-induced CM death; the role of CD39**  
2632 **and A2AR in β1AR- or A2R-induced e[cAMP].**

2633 **A**, Quantitative results of trypan blue exclusion assay showing that L-type Ca<sup>2+</sup> Channel inhibitor  
2634 nifedipine (10 μM) did not have a significant effect on CM death induced by ISO (10 μM for 24 h),  
2635 n=4. **B**, Hypothetical model depicting the mechanism responsible for ISO-induced cAMP efflux  
2636 from CMs. **C**, Results of e[cAMP] levels in supernatants of CMs showing that CD39 inhibitor  
2637 POM1 (20 μM) significantly inhibited e[cAMP] elevation induced by ISO (10 μM for 30 min), n=5.  
2638 **D**, RT-qPCR results showing mRNA levels of CD39 in CMs treated with CD39 shRNA via  
2639 lentivirus. CD39 shRNA largely reduced CD39 expression, n=4. **E**, Results of e[cAMP] levels in  
2640 supernatants of CMs showing that CD39 shRNA significantly inhibited ISO-induced cAMP efflux  
2641 from CMs, n=5. **F**, Results of e[cAMP] levels showing that POM1 did not affect e[cAMP] elevation  
2642 induced by A2R agonist CV1808 (1 μM for 30 min), n=5. **G**, Results of e[cAMP] levels showing  
2643 that A2R antagonist ZM24183 (200 nM) significantly inhibited ISO-induced e[cAMP] elevation,  
2644 n=5. Data were mean ± SEM. Data in **Figures S31A, S31C, and S31E-S31G** were analyzed by  
2645 the two-way ART ANOVA with Bonferroni post-hoc test corrections for 2 comparisons, and **Figure**  
2646 **S31D** by the Mann-Whitney test. All reported P-values have been adjusted for a predetermined  
2647 number of multiple comparisons, as specified in the corresponding figures, except in **Figure S31D**,  
2648 where raw P-value is reported. P <0.05 was statistically significant. ns: no significant difference.  
2649
