# Supplementary material
Source: PubMed Central journal article supplement (PMC10807647)

# Full unedited gel for Figure 20

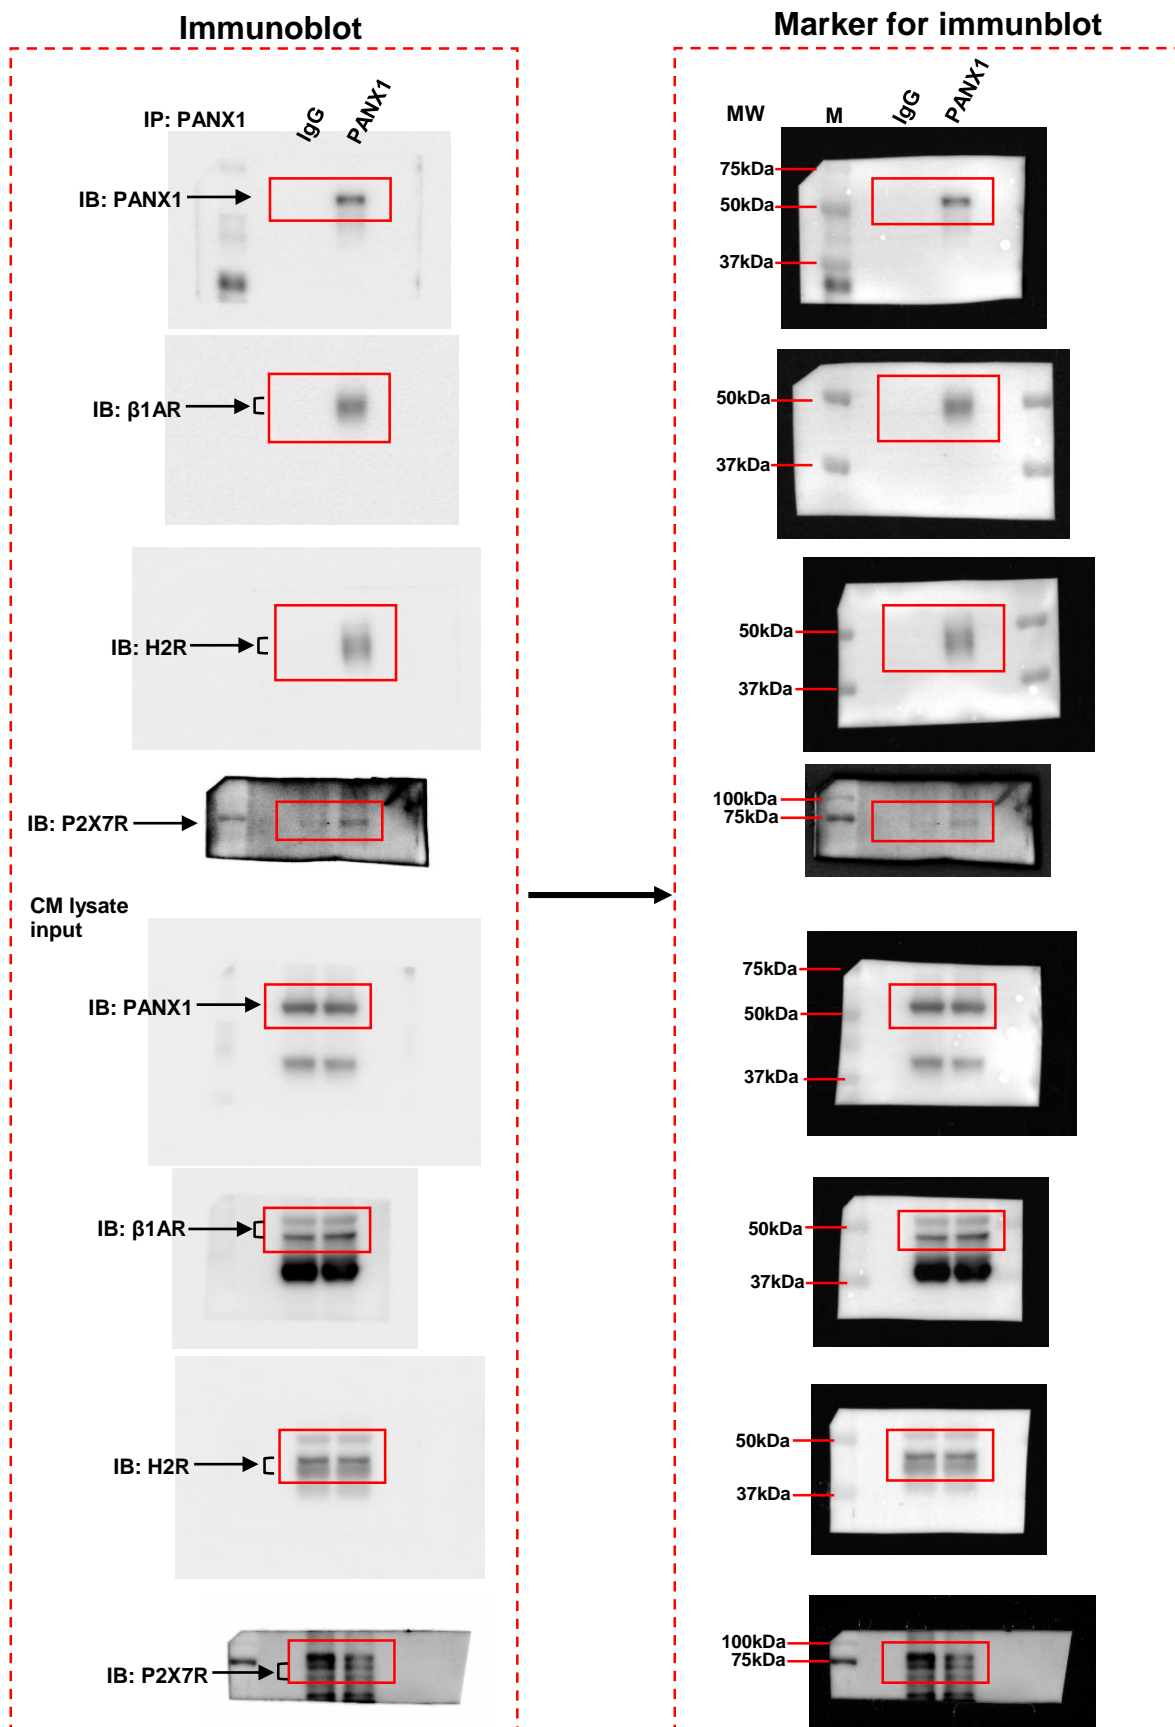

# Full unedited gel for Figure S12E

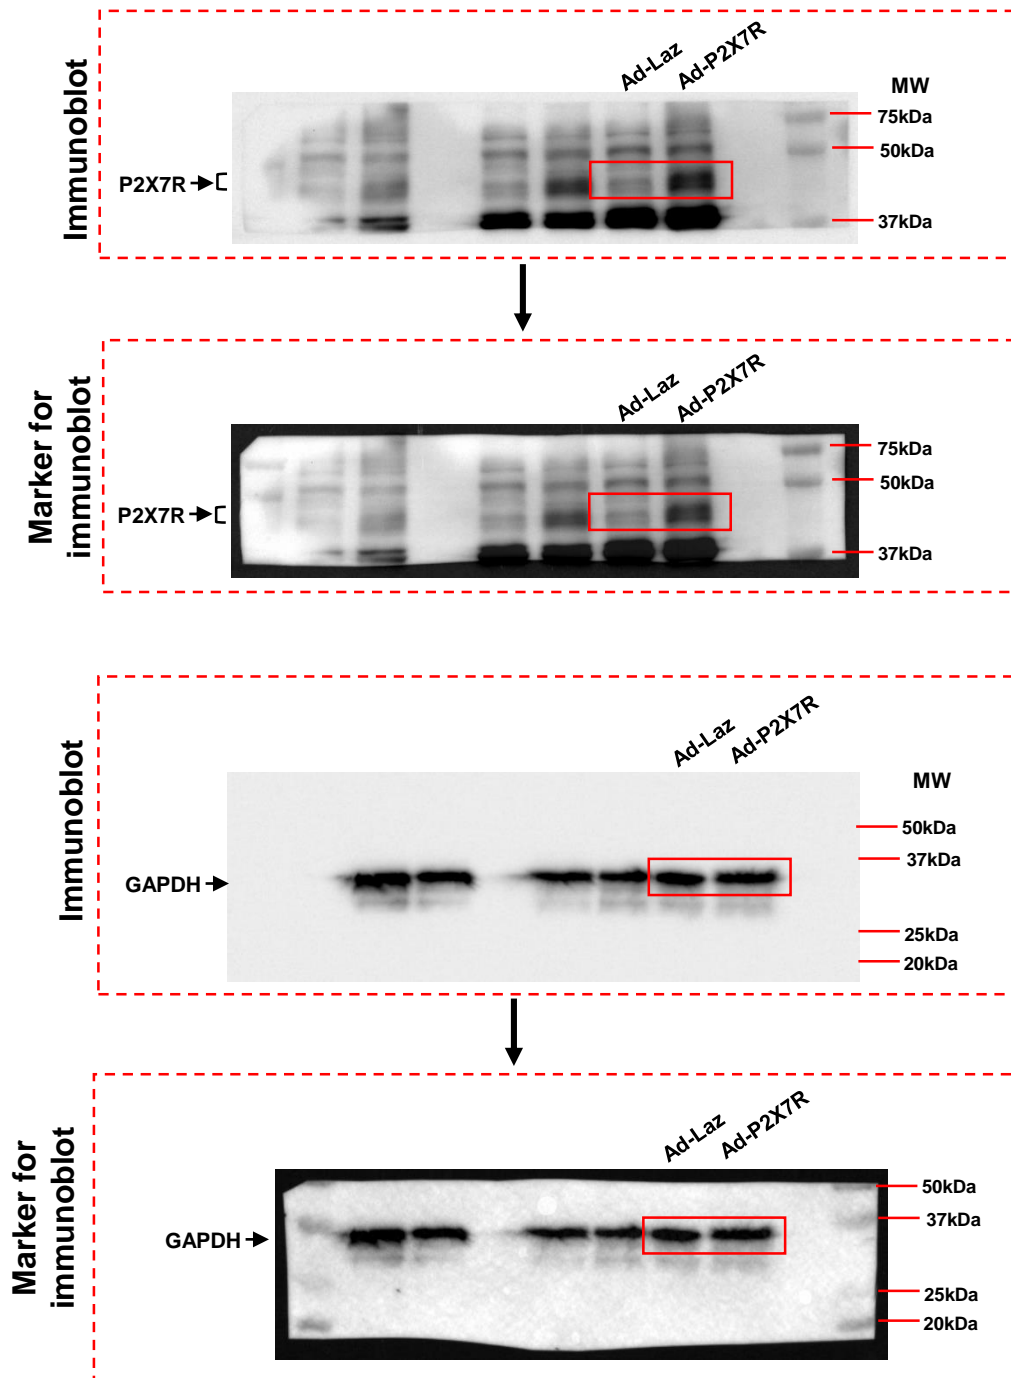

# Full unedited gel for Figure 3C

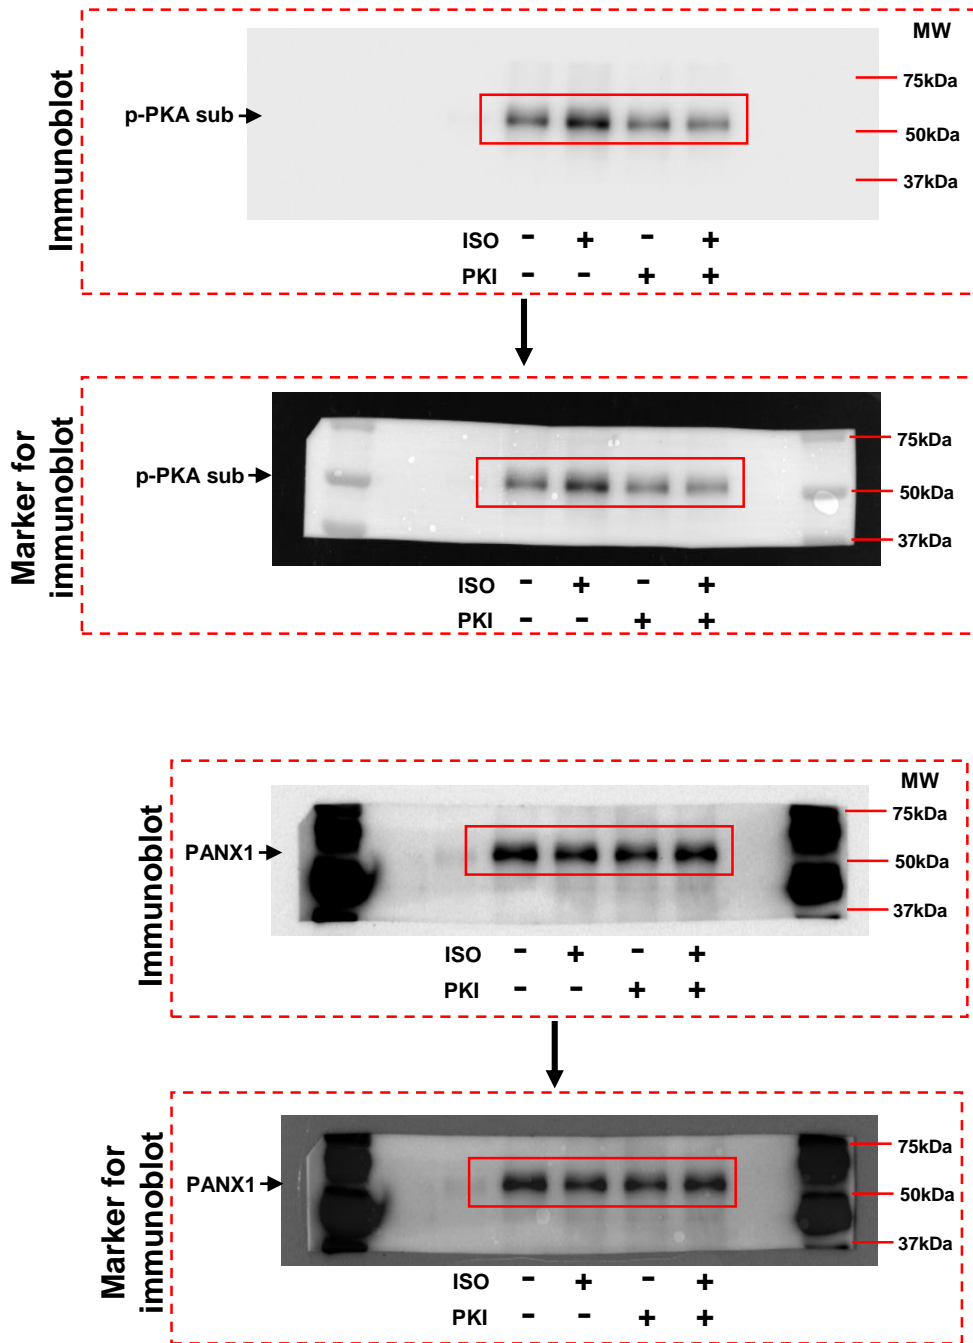

# Full unedited gel for Figure 3G

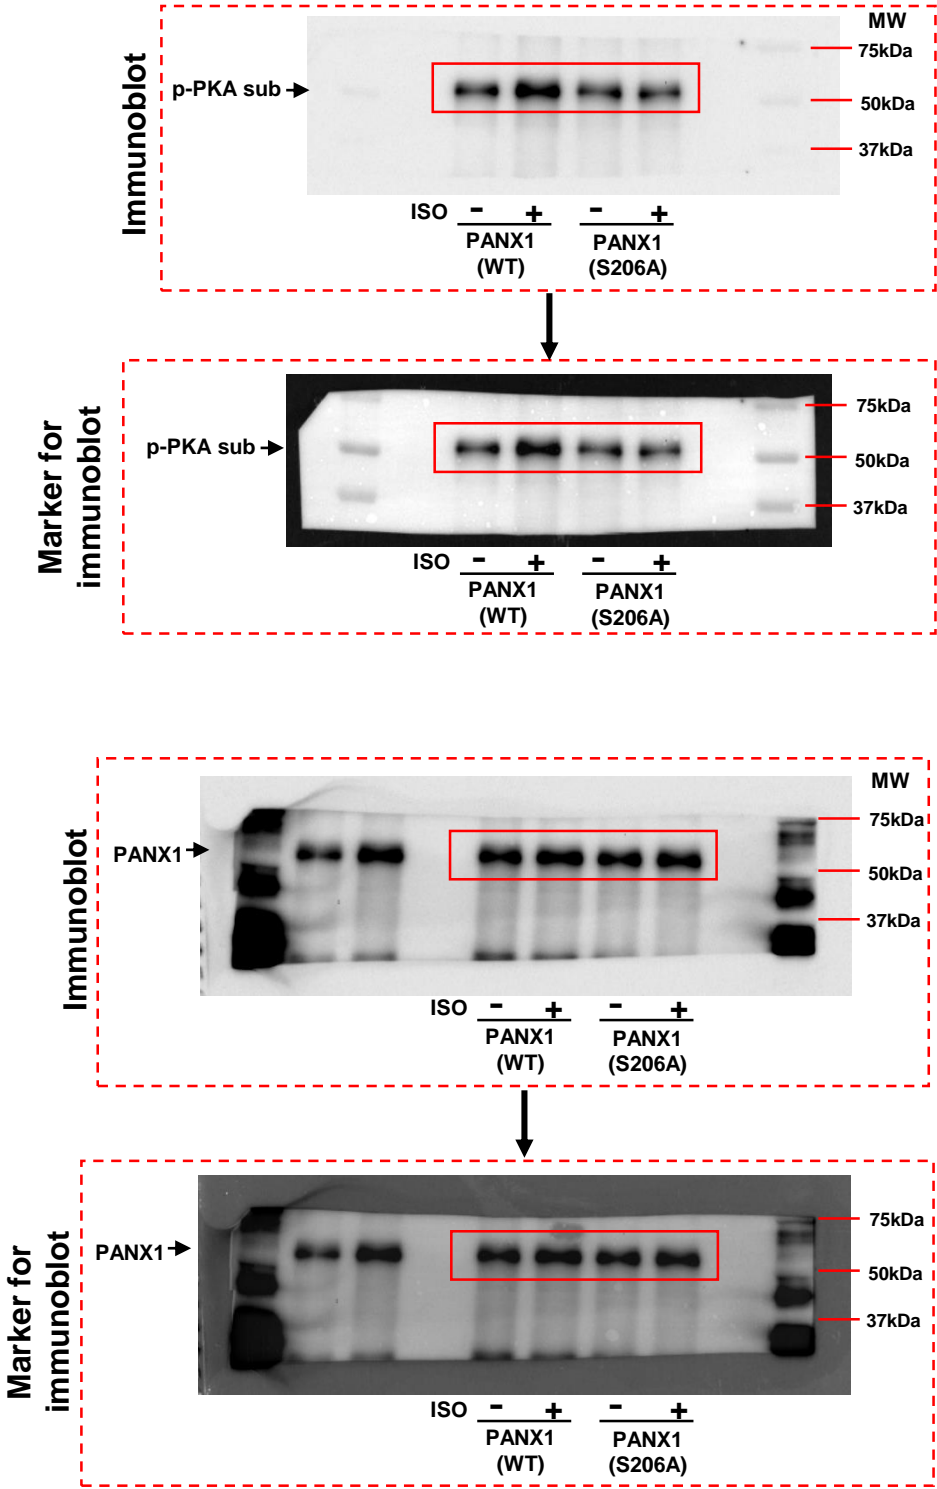

# Full unedited gel for Figure S15B

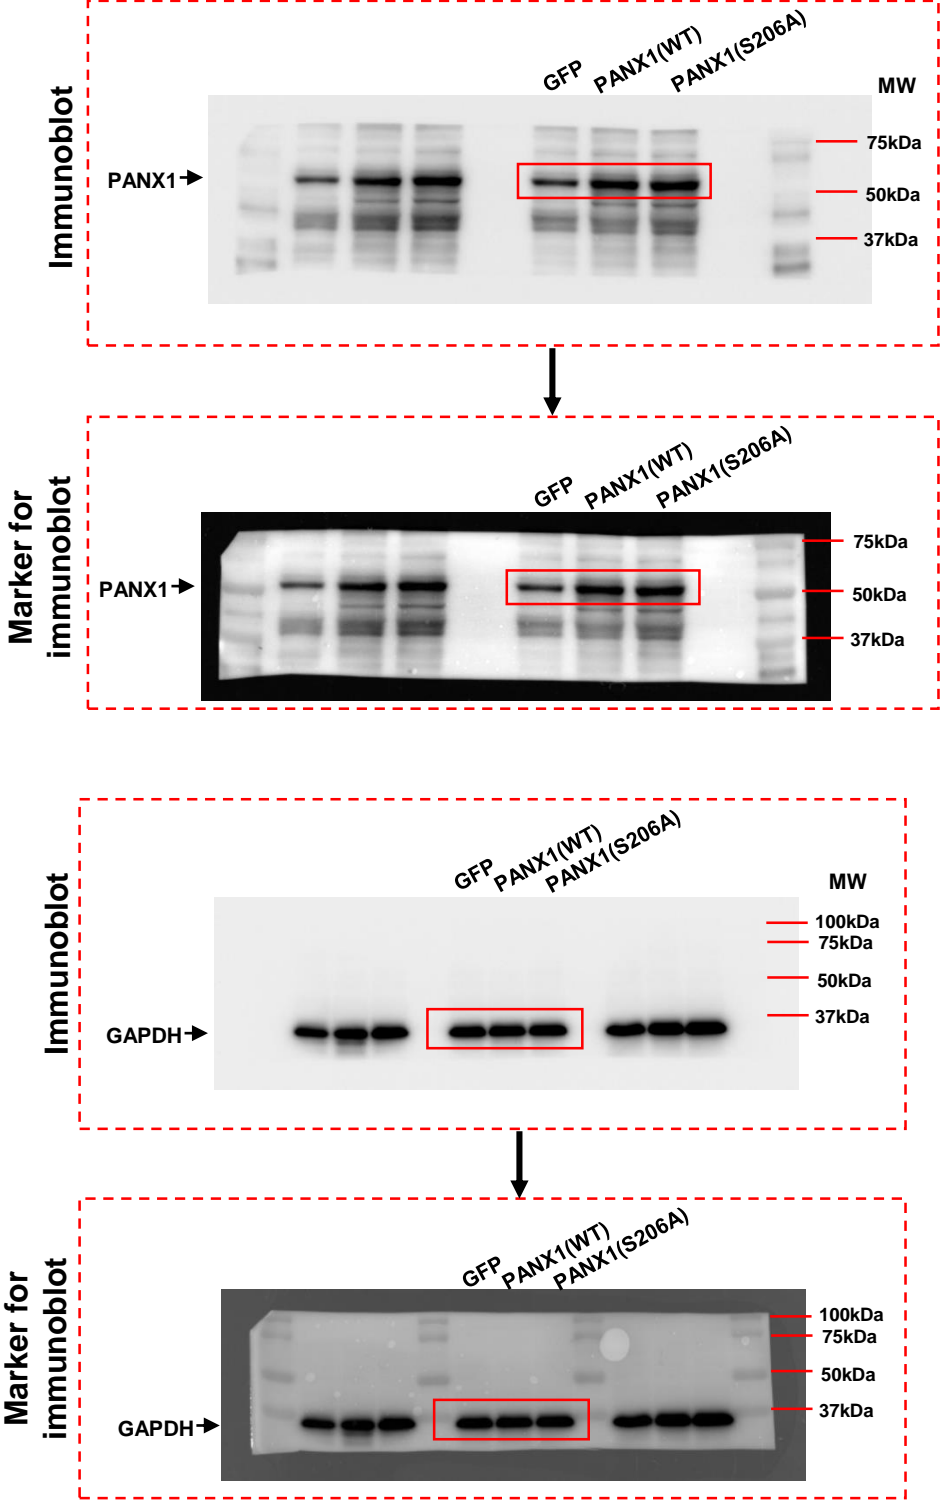

# Full unedited gel for Figure S15G

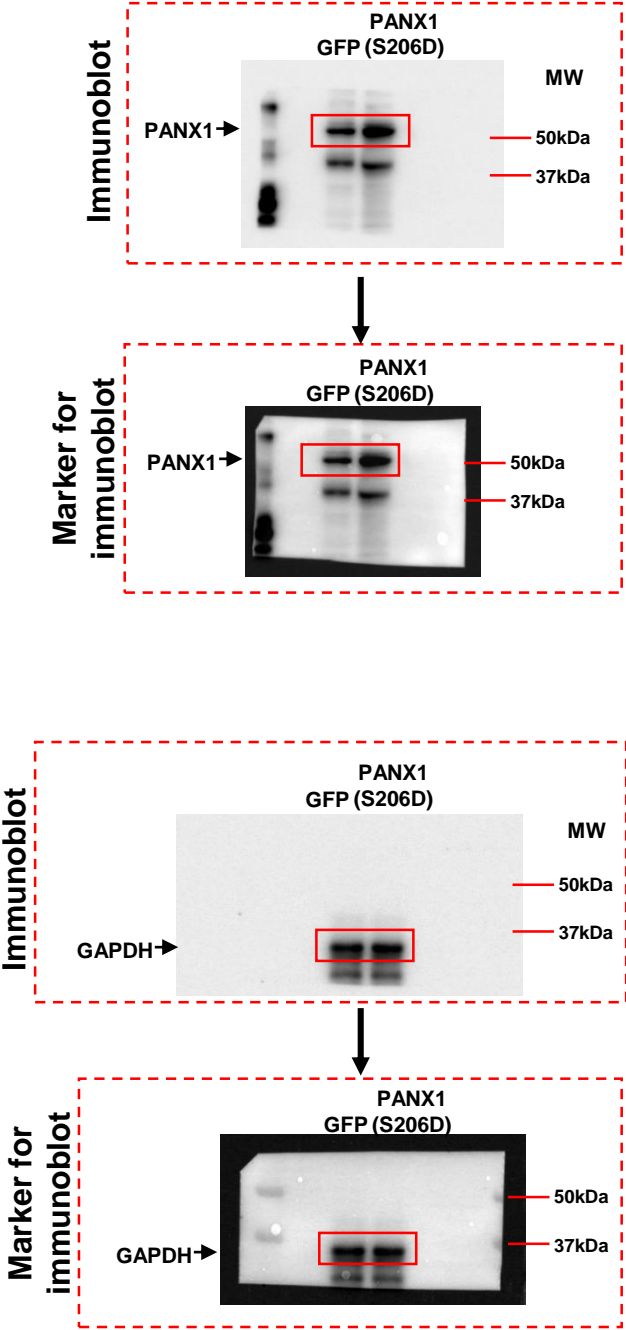

# Full unedited gel for Figure 4B

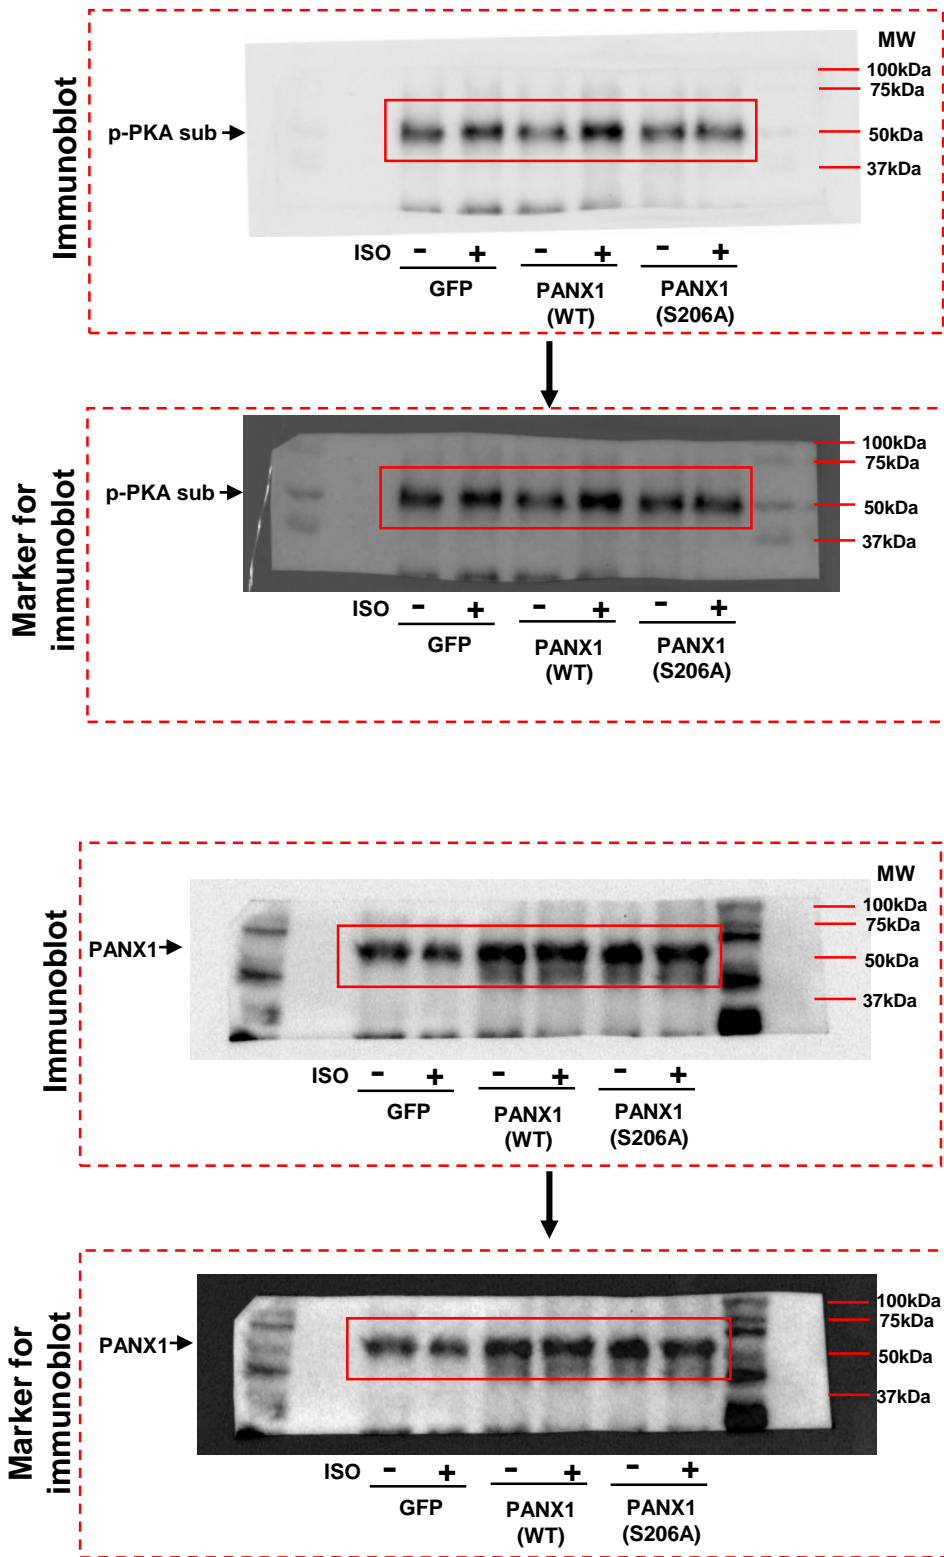

# Full unedited gel for Figure 6N

## Immunoblot

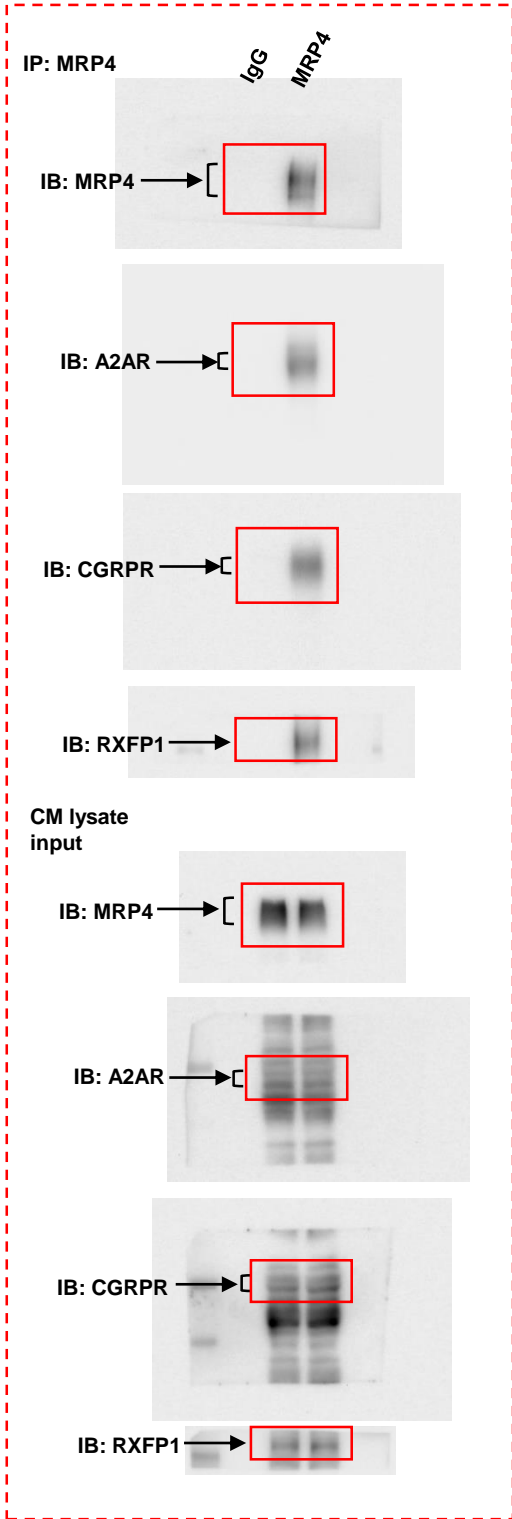

## Marker for immunoblot

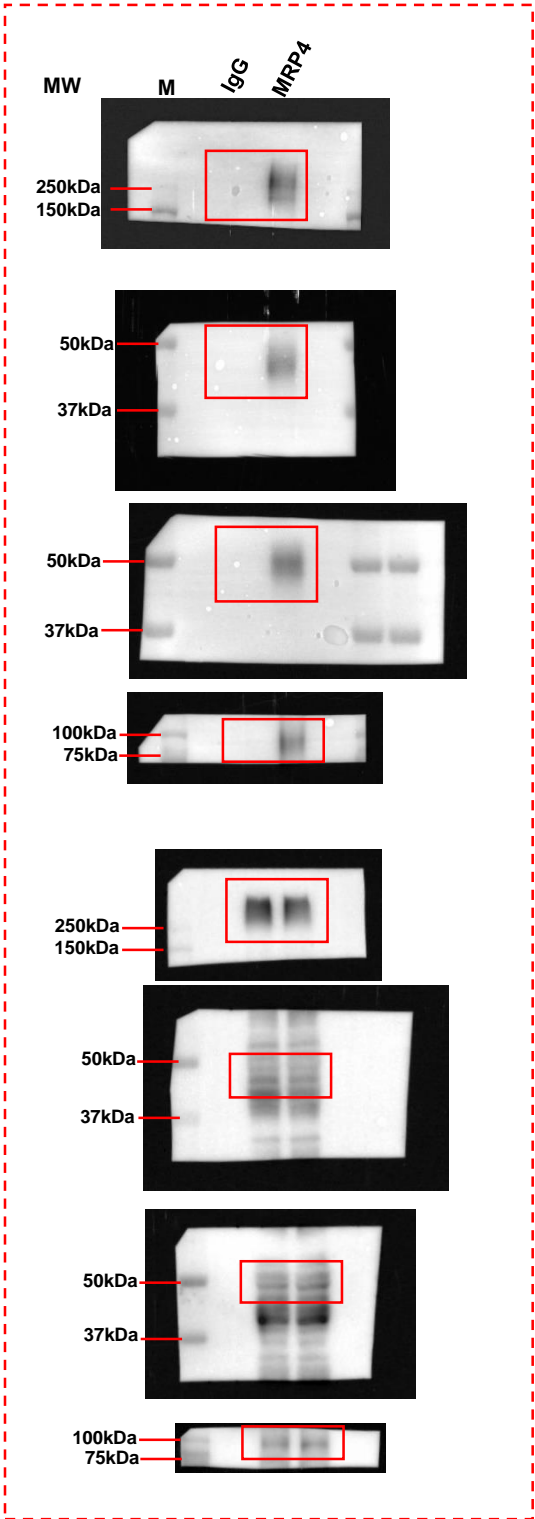

Supplement: NIHMS1937077-supplement-322652_Uncut_Gel_Blots.pdf [file NIHMS1937077-supplement-322652_Uncut_Gel_Blots.pdf]
